# Supplementary material for: Understanding Mental Health in Developmental Dyslexia: A Scoping Review
Source: MDPI journal article supplement (doi:10.3390/ijerph20021653), 2023-01-16
Supplement: s1 [file s1]

**Table S1: Source selection tool**

|                                          | YES                                                                                                                                                                                                                                                                                                                                           | No                                                                                                                                                                                                                                                                |
|------------------------------------------|-----------------------------------------------------------------------------------------------------------------------------------------------------------------------------------------------------------------------------------------------------------------------------------------------------------------------------------------------|-------------------------------------------------------------------------------------------------------------------------------------------------------------------------------------------------------------------------------------------------------------------|
| <b>Publication type</b>                  | <ul style="list-style-type: none"> <li>• Empirical studies – case study, qualitative, quantitative, intervention studies.</li> <li>• Reviews (meta-analysis, systematic, scoping)</li> <li>• Peer reviewed – don't worry about this one at title/abstract screening</li> <li>• Dissertation and thesis</li> <li>• English language</li> </ul> | <ul style="list-style-type: none"> <li>• Editorials</li> <li>• Opinion pieces</li> <li>• Policy/position papers</li> <li>• Book or article reviews</li> <li>• Learning modules</li> <li>• Study protocols</li> <li>• Introductions to special editions</li> </ul> |
| <b>Population</b>                        | <ul style="list-style-type: none"> <li>• Children (0-18)</li> <li>• Primary or secondary students</li> <li>• Parents/teachers/others reporting on childhood reading difficulties/mental health</li> <li>• Adults retrospectively reporting about childhood reading difficulties</li> </ul>                                                    | <ul style="list-style-type: none"> <li>• Adults</li> <li>• Non-human (e.g., rat studies)</li> <li>• College/Uni samples</li> <li>• second language</li> </ul>                                                                                                     |
| <b>Concept one: reading difficulties</b> | <ul style="list-style-type: none"> <li>• Children with dyslexia</li> <li>• Children with Specific Learning Disorder (sub-type not specified)</li> </ul>                                                                                                                                                                                       | <ul style="list-style-type: none"> <li>• Studies were a reading difficulties group or an SLD are not mentioned in the title/abstract</li> </ul>                                                                                                                   |

|                                                                      |                                                                                                                                                                                                                                                                                                                                                                                                                                                                                                                                                                                        |                                                                                                                                                                                                                                                                                                                                                    |
|----------------------------------------------------------------------|----------------------------------------------------------------------------------------------------------------------------------------------------------------------------------------------------------------------------------------------------------------------------------------------------------------------------------------------------------------------------------------------------------------------------------------------------------------------------------------------------------------------------------------------------------------------------------------|----------------------------------------------------------------------------------------------------------------------------------------------------------------------------------------------------------------------------------------------------------------------------------------------------------------------------------------------------|
|                                                                      | <ul style="list-style-type: none"> <li>• Learning difficulties/literacy difficulties</li> <li>• Word reading or reading fluency difficulties</li> <li>• Poor readers, struggling readers, children with reading difficulties, reading disorder</li> <li>• Neurodevelopmental disorders – is there a learning/reading difficulties group mentioned in the title/abstract? Then YES.</li> <li>• Poor comprehending in addition to poor word reading difficulties</li> <li>• Co-occurring ADHD, language difficulties, or additional learning difficulties are to be expected.</li> </ul> | <ul style="list-style-type: none"> <li>• Children who are only poor comprehenders</li> <li>• Poor reading due to:</li> <li>• Reading difficulties associated with: lack of educational opportunity (e.g. Head start schools), biomedical factors (e.g., brain injury, Fragile X, epilepsy), sensory issues (e.g., hearing loss); autism</li> </ul> |
|                                                                      | <b>YES</b>                                                                                                                                                                                                                                                                                                                                                                                                                                                                                                                                                                             | <b>NO</b>                                                                                                                                                                                                                                                                                                                                          |
| <b>Concept 2– internalising/externalising mental health concerns</b> | <b>YES</b> <ul style="list-style-type: none"> <li>• Internalising behaviour (emotional difficulties; anxiety, depression, somatic complaints)</li> <li>• Externalising behaviour (behaviour difficulties;</li> </ul>                                                                                                                                                                                                                                                                                                                                                                   | <b>No – in the absence of internalising/externalising</b> <ul style="list-style-type: none"> <li>• School refusal</li> <li>• Attentional difficulties</li> <li>• Incarceration</li> <li>• NSSI</li> <li>• Suicidal behaviour</li> </ul>                                                                                                            |

|                                |                                                                                                                                                                                                                                                                                                                                                                                                                                                                                                                        |                                                                                                                                                                                                                                                                                                                                                        |
|--------------------------------|------------------------------------------------------------------------------------------------------------------------------------------------------------------------------------------------------------------------------------------------------------------------------------------------------------------------------------------------------------------------------------------------------------------------------------------------------------------------------------------------------------------------|--------------------------------------------------------------------------------------------------------------------------------------------------------------------------------------------------------------------------------------------------------------------------------------------------------------------------------------------------------|
|                                | <p>(hyperactivity, impulsivity, conduct problems (e.g., aggression, rule-breaking)</p> <ul style="list-style-type: none"> <li>• Externalising disorders (ADHD, CD, ODD).</li> <li>• Internalising disorders (e.g., depression, anxiety disorder sub-types, reading/test anxiety)</li> <li>• Psycho-social or socio-emotional difficulties assessed by global measures</li> <li>• For qualitative studies parent, child, teacher report of mental health/emotional difficulties is sufficient for inclusion.</li> </ul> | <ul style="list-style-type: none"> <li>• Substance abuse</li> <li>• Eating disorders</li> <li>• Peer problems (e.g., bullying victimisation).</li> <li>• Psychosis</li> <li>• Self-esteem, self-concept, self-perception</li> <li>• Stress</li> </ul>                                                                                                  |
| <b>Concept 3: Third factor</b> | <ul style="list-style-type: none"> <li>• Qual studies – another factor other than internalising/externalising explored e.g., self-esteem, coping strategies.</li> <li>• Individual level (e.g., self-esteem, emotion regulation, theory of mind skills, executive function skills); family level (e.g., parental attachment, parental mental</li> </ul>                                                                                                                                                                | <ul style="list-style-type: none"> <li>• No third factor</li> <li>• Un-modifiable (once child at primary school) third factors – e.g., gender, age, antenatal conditions (e.g., maternal smoking), toxins</li> <li>• Gene studies</li> <li>• brain /fMRI studies</li> <li>• Institutional care/adoption</li> <li>• Fatty acids, medications</li> </ul> |

|                |                                                                                                                                                                                  |                                                                            |
|----------------|----------------------------------------------------------------------------------------------------------------------------------------------------------------------------------|----------------------------------------------------------------------------|
|                | health); community level (e.g., peer relationships, classroom modifications). <ul style="list-style-type: none"><li>• Motor coordination</li><li>• BMI/weight/exercise</li></ul> | <ul style="list-style-type: none"><li>• Attentional difficulties</li></ul> |
| <b>Context</b> | <ul style="list-style-type: none"><li>• Any country</li><li>• Kids in mainstream or special schooling</li><li>• Alphabetic languages</li></ul>                                   | <ul style="list-style-type: none"><li>• Non-alphabetic languages</li></ul> |

**Table S2: An example of a full search**

APA PsycInfo &lt;1806 to July Week 1 2021&gt;

| # | Query                                                                                                                                                                                                                                                                                                                                                                                                                                                       | Results from 11 Jul 2021 |
|---|-------------------------------------------------------------------------------------------------------------------------------------------------------------------------------------------------------------------------------------------------------------------------------------------------------------------------------------------------------------------------------------------------------------------------------------------------------------|--------------------------|
| 1 | (Child* or teen* or adolescen* or youth or young).mp. [mp=title, abstract, heading word, table of contents, key concepts, original title, tests & measures, mesh]                                                                                                                                                                                                                                                                                           | 1,224,590                |
| 2 | exp Dyslexia/                                                                                                                                                                                                                                                                                                                                                                                                                                               | 6,969                    |
| 3 | (dyslexi* or "poor reader*" or "reading abilit*" or "reading skill*" or "reading achievement" or "reading difficult*" or "reading disorder*" or "reading impair*" or "reading delay" or "reading defici*" or "reading disabilit*" or "literacy difficult*" or "learning disorder" or "struggl* adj3 read*").mp. [mp=title, abstract, heading word, table of contents, key concepts, original title, tests & measures, mesh]                                 | 38,823                   |
| 4 | exp Internalizing Symptoms/ or exp Externalizing Symptoms/                                                                                                                                                                                                                                                                                                                                                                                                  | 1,227                    |
| 5 | (internali?ing or "somatic complaint*" or anxious or anxiety or depression or depressed or "emotion* difficult*" or "emotion* problem*" or psycho?social or socio?emotion* or withdrawn or "mental health" or hyperactiv* or impulsiv* or externali?ing or "conduct problem*" or "behaviour* problem*" or "behavior* problem*" or aggress*).mp. [mp=title, abstract, heading word, table of contents, key concepts, original title, tests & measures, mesh] | 934,610                  |
| 6 | 2 or 3                                                                                                                                                                                                                                                                                                                                                                                                                                                      | 38,823                   |
| 7 | 4 or 5                                                                                                                                                                                                                                                                                                                                                                                                                                                      | 934,610                  |
| 8 | 1 and 6 and 7                                                                                                                                                                                                                                                                                                                                                                                                                                               | 2,296                    |
| 9 | limit 8 to (peer reviewed journal and english language)                                                                                                                                                                                                                                                                                                                                                                                                     | 1,523                    |

(Child\* or teen\* or adolescen\* or youth or young).mp. [mp=title, abstract, heading word, table of contents, key concepts, original title, tests & measures, mesh]  
exp Dyslexia/  
(dyslexi\* or "poor reader\*" or "reading abilit\*" or "reading skill\*" or "reading achievement" or "reading difficult\*" or "reading disorder\*" or "reading impair\*" or "reading delay" or "reading defici\*" or "reading disabilit\*" or "literacy difficult\*" or "learning disorder" or "struggl\* adj3 read\*").mp. [mp=title, abstract, heading word, table of contents, key concepts, original title, tests & measures, mesh]  
exp Internalizing Symptoms/ or exp Externalizing Symptoms/  
(internali?ing or "somatic complaint\*" or anxious or anxiety or depression or depressed or "emotion\* difficult\*" or "emotion\* problem\*" or psycho?social or so-cio?emotion\* or withdrawn or "mental health" or hyperactiv\* or impulsiv\* or externali?ing or "conduct problem\*" or "behaviour\* problem\*" or "behavior\* problem\*" or aggress\*).mp. [mp=title, abstract, heading word, table of contents, key concepts, original title, tests & measures, mesh]  
2 or 3  
4 or 5  
1 and 6 and 7  
limit 8 to (peer reviewed journal and english language)

**Table S3. Individual, Family, and Community-level factors associated with internalising/externalising symptoms among children with word-reading difficulties (dyslexia)**

\* Due to the referencing requirements of this journal the reference number for the studies in this table are different to those in Table 1 in the body of the article.

| Author (Date)                   | Title                                                                                                                             | Aim of study                                                                                                                                                                                         | Population                                                                                                                                                                                                                                                           | Learning/Reading Difficulties                                                                                                                                                                  | Context                                                                                                                                                                                         | Mental Health Concept                                                                                                                                            | Third factor of interest                                                                                                                                        | Methodology                                                                                                                                                                                     | Key findings                                                                                                                                                                            |
|---------------------------------|-----------------------------------------------------------------------------------------------------------------------------------|------------------------------------------------------------------------------------------------------------------------------------------------------------------------------------------------------|----------------------------------------------------------------------------------------------------------------------------------------------------------------------------------------------------------------------------------------------------------------------|------------------------------------------------------------------------------------------------------------------------------------------------------------------------------------------------|-------------------------------------------------------------------------------------------------------------------------------------------------------------------------------------------------|------------------------------------------------------------------------------------------------------------------------------------------------------------------|-----------------------------------------------------------------------------------------------------------------------------------------------------------------|-------------------------------------------------------------------------------------------------------------------------------------------------------------------------------------------------|-----------------------------------------------------------------------------------------------------------------------------------------------------------------------------------------|
| Abarrate (1993) Dissertation[1] | Behavior problems and social competence in attention deficit hyperactivity disorder children with and without a learning disorder | To investigate how children with ADHD with and without learning difficulties differ in relation to behaviour problems and social competence                                                          | Children aged 7-12 years (n = 26 with ADHD and n = 26 ADHD with comorbid learning difficulties)                                                                                                                                                                      | Learning disorder based on IQ-performance discrepancy criteria using standardised measures and/or placement in Special Education class                                                         | Lower Coachella Valley, USA                                                                                                                                                                     | Internalising/externalising symptoms measured by teacher report with the relevant sub-scale of the Child Behaviour Checklist (CBCL; Achenbach & Edelbrock, 1984) | <b>Community-level:</b> children's social problems (referred to as social competence) measured by teacher-report with the social problems sub-scale of the CBCL | Cross-sectional. Data was analysed with ANOVA / MANOVA. The analysis appears to have been confined to the social problems and externalising symptoms (not internalising) sub-scales of the CBCL | Results suggest that coexisting learning difficulty is the differentiating factor in determining whether a child with ADHD has poorer social competence and more externalising symptoms |
| Aitken et al., 2020[2]          | Profiles of co-occurring difficulties identified through school-based screening                                                   | To investigate patterns of co-occurrence among five common childhood difficulties: inattention/hyperactivity, internalising symptoms, externalising symptoms, peer problems and reading difficulties | 501 children (age range 6-9 years; 254 girls) were recruited from seven schools. 97% of the sample spoke English as their first language. Eligibility for participation was based on being in a mainstream class, and not having any sensory or physical impairments | A reading difficulties group was determined based on scores in the bottom quartile of the Dynamic Indicators of Basic Early Literacy Skills Oral Reading Fluency Task (Good & Kaminiski, 2002) | Participants were recruited from one suburban and one rural school board in Ontario Canada. 25% of the children were in a French immersion class in which most of the instruction is in French. | Internalising/externalising symptoms were reported on by parents with the Strengths and Difficulties Questionnaire (SDQ; Goodman, 1997)                          | <b>Community level:</b> Peer problems measured by parent and teacher report with the peer problems sub-scale of the SDQ                                         | Longitudinal. The data was collected at two time-points 1 year apart and analysed using latent class analysis                                                                                   | In the present study no co-occurring difficulties with reading, peer problems or internalising/externalizing symptoms were present                                                      |

| Author (Date)             | Title                                                                                                                  | Aim of study                                                                                                                                                                        | Population                                                                                                                                                                                   | Learning/Reading Difficulties                                                                                                                                                                                                             | Context                                                                                  | Mental Health Concept                                                                                                               | Third factor of interest                                                                                                                                                                                                                                                                                                                                                                                                                                                                                                             | Methodology                                                                                                                                                                                                 | Key findings                                                                                                                                                                                                                                                                                                                                                                                                                                                                                                                                                                                                                                    |
|---------------------------|------------------------------------------------------------------------------------------------------------------------|-------------------------------------------------------------------------------------------------------------------------------------------------------------------------------------|----------------------------------------------------------------------------------------------------------------------------------------------------------------------------------------------|-------------------------------------------------------------------------------------------------------------------------------------------------------------------------------------------------------------------------------------------|------------------------------------------------------------------------------------------|-------------------------------------------------------------------------------------------------------------------------------------|--------------------------------------------------------------------------------------------------------------------------------------------------------------------------------------------------------------------------------------------------------------------------------------------------------------------------------------------------------------------------------------------------------------------------------------------------------------------------------------------------------------------------------------|-------------------------------------------------------------------------------------------------------------------------------------------------------------------------------------------------------------|-------------------------------------------------------------------------------------------------------------------------------------------------------------------------------------------------------------------------------------------------------------------------------------------------------------------------------------------------------------------------------------------------------------------------------------------------------------------------------------------------------------------------------------------------------------------------------------------------------------------------------------------------|
| Alexander-Passe (2006)[3] | How dyslexic teenagers cope: An investigation of self-esteem, coping, and depression                                   | To investigate how adolescents with dyslexia cope with their difficulties and how this relates to their self-esteem and depression                                                  | 19 adolescents (12 male <i>M-academic year</i> = 11.17; 7 female, <i>M-academic year</i> = 11.86)                                                                                            | Recruitment occurred through dyslexia associations and an educational psychologist. No further description of criteria for dyslexia were provided                                                                                         | London, United Kingdom                                                                   | Depression was measured by self-report with the Beck-Depression Inventory (BDI-II; Beck et al., 1996)                               | <b>Individual-level:</b> Adolescents reported on their self-esteem with the Culture-free Self-Esteem Inventory (CFSEI; Battle, 1992) and their coping strategies with the Coping Scale for Stressful Situations (adolescent versions) (Endler & Parker, 1999)                                                                                                                                                                                                                                                                        | Cross-sectional. Results on variables of interest were compared with other studies                                                                                                                          | Results suggest that girls with dyslexia may be particularly susceptible to depression and low self-esteem and employ more emotional and avoidant coping strategies than boys                                                                                                                                                                                                                                                                                                                                                                                                                                                                   |
| Al-Yagon (2009)[4]        | Comorbid LD and ADHD in childhood: Socioemotional and behavioural adjustment and parents' positive and negative affect | To examine a variety of risk and protective factors for socio-emotional difficulties among children with co-morbid ADHD/LD relative to those considered to have typical development | The sample consisted of 118 father-mother-child (8-12 years) triads; 59 children with co-morbid ADHD/LD (42 boys, 17 girls) and 59 with a child with typical development (40 boys, 19 girls) | All children in the co-morbid ADHD/LD group had been formally diagnosed prior to participating in the study. Diagnostic criteria were reported as being consistent with DSM-4 criteria. Sub-type of learning difficulty was not described | Children were attending public schools in the urban areas of central and southern Israel | Internalising/externalising symptoms measured by father and mother report on the Child Behaviour Checklist (CBCL; Achenbach, 1991). | <b>Individual-level:</b> Children reported on their coping and resilience with the Children's Sense of Coherence Scale (Margalit & Efranti, 1995; the Effort Scale (ES; Lackaye & Margalit, 2006); the Children's Hope Scale (CHS; Lackaye & Margalit, 2006). <b>Family-level:</b> Children reported on child-parent relationships with the Attachment Security Scale (ASS; Kers et al., 1996) and parents reported on their own confidence and mental health with the Affect Scale (AS; Moos et al., 1987). <b>Community level:</b> | Cross-sectional. A group comparison (children/parents with/without disability) analysis was followed by an investigation of the various risk and protective factors to children's socio-emotional wellbeing | Relative to children with typical development, children with ADHD/LD self-reported more loneliness, lower sense of coherence (resilience) and less hope. Parents of these children, relative to those with typical development, also reported more socio-emotional and behavioural difficulties (internalising and externalising) among their children. Father's negative affect and depression, and mother's negative affect were associated with higher levels of child internalising/externalising symptoms. Children's attachment to parents did not appear to be associated with their internalising/externalising symptoms in this sample |



| Author (Date)      | Title                                                                                                                          | Aim of study                                                                                                                                                                                          | Population                                                                                                                                                                               | Learning/Reading Difficulties                                                                                                                                                                                | Context                                                                            | Mental Health Concept                                                                                                                                                  | Third factor of interest                                                                                                                                                                                                                                                                                                                                                                                                                                                                                                                                                                                                                | Methodology                                                                                                                                                                                                                         | Key findings                                                                                                                                                                                                                                                                                                                                                                                                                                                                                                                             |
|--------------------|--------------------------------------------------------------------------------------------------------------------------------|-------------------------------------------------------------------------------------------------------------------------------------------------------------------------------------------------------|------------------------------------------------------------------------------------------------------------------------------------------------------------------------------------------|--------------------------------------------------------------------------------------------------------------------------------------------------------------------------------------------------------------|------------------------------------------------------------------------------------|------------------------------------------------------------------------------------------------------------------------------------------------------------------------|-----------------------------------------------------------------------------------------------------------------------------------------------------------------------------------------------------------------------------------------------------------------------------------------------------------------------------------------------------------------------------------------------------------------------------------------------------------------------------------------------------------------------------------------------------------------------------------------------------------------------------------------|-------------------------------------------------------------------------------------------------------------------------------------------------------------------------------------------------------------------------------------|------------------------------------------------------------------------------------------------------------------------------------------------------------------------------------------------------------------------------------------------------------------------------------------------------------------------------------------------------------------------------------------------------------------------------------------------------------------------------------------------------------------------------------------|
|                    |                                                                                                                                |                                                                                                                                                                                                       |                                                                                                                                                                                          |                                                                                                                                                                                                              |                                                                                    |                                                                                                                                                                        | Children completed the Loneliness and Social Dissatisfaction Scale (LSDS; Asher et al., 1990)                                                                                                                                                                                                                                                                                                                                                                                                                                                                                                                                           |                                                                                                                                                                                                                                     |                                                                                                                                                                                                                                                                                                                                                                                                                                                                                                                                          |
| Al-Yagon (2014)[5] | Child-mother and child-father attachment security: links to internalizing adjustment among children with learning disabilities | To investigate the role of children's attachment to their father and mother in explaining internalising symptoms among children with learning disabilities relative to those with typical development | The sample consisted of 107 children with learning difficulties (52 girls and 54 boys) and 98 children (56 girls and 42 boys) with typical development aged 8–12 years and their parents | All children in the LD group had been formally diagnosed prior to participating in the study. Diagnostic criteria as being consistent with DSM-4 criteria. Sub-type of learning difficulty was not described | Children were recruited from 7 elementary schools in urban areas of central Israel | Fathers and mothers reported on their child's internalising symptomology with the internalising sub-scale of the Child Behaviour Checklist (CBCL; Israeli translation) | <b>Individual-level:</b> Children reported on their coping strategies (sense of coherence, hope, and effort (e.g., item "I don't give up even when it is difficult for me") with the Children's Sense of Coherence Scale (Margalit & Efranti, 1995) and Children's Hope and Effort Scale (Snyder et al., 1997; Lackaye & Margalit, 2006). <b>Family-level:</b> Children also reported on child-parent relationships with the Attachment Security Style (Kerns, Klepac & Cole, 1996). <b>Community-level:</b> loneliness and social (dis)satisfaction measured with the Loneliness and Social Dissatisfaction Scale (Asher et al., 1990) | Cross-sectional. Group differences on all variables were analysed followed by Structural Equation Modelling to analyse the influence of mother and father attachment on all the child variables (loneliness, internalising, coping) | Children with learning difficulties had more parent reported internalising symptoms, more self-reported loneliness, and poorer coping (effort, hope, and sense of coherence) than typically developing peers. The child and parent-reported internalising symptoms did not correlate in either group. However, findings suggest that children with learning difficulties may be more vulnerable to insecure attachment with their parents and indicate the possible protective function of secure relationships with mothers and fathers |
| Al-Yagon (2016)[6] | Perceived close relationships with parents, teachers, and                                                                      | To compare adolescent's attachment relationships with                                                                                                                                                 | 280 adolescents (15–17 years, 154 girls), 90 with a learning                                                                                                                             | Sub-samples of children with learning difficulties were all                                                                                                                                                  | Children came from regular public high schools in urban                            | Children self-reported on their mental health with the Hebrew adaptation of the Affect Scale (Moos et al., 1987) and the youth                                         | <b>Family and Community-level:</b> Inter-group differences in 3 forms of                                                                                                                                                                                                                                                                                                                                                                                                                                                                                                                                                                | Cross-sectional. Data was analysed via multigroup structural                                                                                                                                                                        | High quality of perceived friendship with a best friend seemed particularly important for the mental health (both                                                                                                                                                                                                                                                                                                                                                                                                                        |

| Author (Date)                  | Title                                                                                                           | Aim of study                                                                                                                                                                                      | Population                                                                                                                                                                                                         | Learning/Reading Difficulties                                                                                         | Context                                                                                            | Mental Health Concept                                                                                                                                                                                     | Third factor of interest                                                                                                                                                                                                                                                                                                                                                | Methodology                                                                                                                                                                                                                                           | Key findings                                                                                                                                                                                                                                                                                                                                                                                                                                                                           |
|--------------------------------|-----------------------------------------------------------------------------------------------------------------|---------------------------------------------------------------------------------------------------------------------------------------------------------------------------------------------------|--------------------------------------------------------------------------------------------------------------------------------------------------------------------------------------------------------------------|-----------------------------------------------------------------------------------------------------------------------|----------------------------------------------------------------------------------------------------|-----------------------------------------------------------------------------------------------------------------------------------------------------------------------------------------------------------|-------------------------------------------------------------------------------------------------------------------------------------------------------------------------------------------------------------------------------------------------------------------------------------------------------------------------------------------------------------------------|-------------------------------------------------------------------------------------------------------------------------------------------------------------------------------------------------------------------------------------------------------|----------------------------------------------------------------------------------------------------------------------------------------------------------------------------------------------------------------------------------------------------------------------------------------------------------------------------------------------------------------------------------------------------------------------------------------------------------------------------------------|
|                                | peers: Predictors of social, emotional, and behavioural features in adolescents with LD or comorbid LD and ADHD | parents, teachers, and friends and how these are related to children's mental health                                                                                                              | difficulties diagnosis, 91 with combined ADHD and learning difficulties, and 99 classified as typically developing                                                                                                 | formally diagnosed with an SLD in accordance with DSM-4 criteria. Subtype of learning difficulty was not described    | areas of Israel. First language wasn't mentioned but were all Hebrew language                      | version of the Child Behaviour Checklist (CBCL; Achenbach, 1991)                                                                                                                                          | attachment relationship (parents, teachers, peers) were investigated: Child-parent relationship (using the Attachment Security Style; Kerns et al., 1996), child-teacher relationship (using the Children's Appraisal of Teacher as a secure Base Scale (Al-Yagon & Mikulincer, 2006) and friendship (using the Friendship Quality Questionnaire; Parker & Asher, 1993) | equation modeling                                                                                                                                                                                                                                     | internalising and externalising) of children with learning difficulties (with and without ADHD). Having a caring teacher was associated with higher levels of positive affect among children with learning difficulties. Children with learning difficulties, compared to controls, appeared more vulnerable to the effects of insecure attachment to their mothers in terms of their mental health than the other groups                                                              |
| Antshel & Guy-Ronald (2006)[7] | Maternal stress in nonverbal learning disorder: A comparison with reading disorder                              | To investigate mothers' stress and coping in association with children's mental health among children with two subtypes of learning difficulty: reading disorder and non-verbal learning disorder | 75 mother-child dyads (8-11 years, 51 boys) including 31 children with a diagnosed reading disorder, 21 with non-verbal learning disorder and a "typically developing" control group matched by age, gender and IQ | Inclusion criteria to the reading disorder sub-group were that the children met DSM-4 criteria for a reading disorder | USA. The majority of participants were European American and all spoke English as a first language | Children's social, emotional, and behavioural wellbeing was measured by parent and teacher report using the relevant versions of the Behaviour Assessment for Children (BASC; Reynolds & Kamphaus, 1992). | <b>Family-level:</b> Mother's self-reported parenting stress, mental health, and perceived levels of social support measured respectively by the Parenting-Stress Index-Short Form (PSI-SF; Abidin, 1990) the Symptom Checklist 90-Revised (SCL-90-R; Derogatis, 1983) and Social Support Questionnaire (SSQ; Sarason et al., 1983)                                     | Cross-sectional. Regression analysis was used to investigate the contribution of the maternal variables to children's internalising and externalising symptoms by group (reading difficulties vs non-verbal learning disorder vs typical development) | Mothers of children with reading disorder reported higher levels of general distress than the other 2 groups and were more likely to report their child's behaviour as "difficult" relative to those who had children with no learning disabilities. Among those with reading difficulties, children's internalising symptoms were not related to their mother's level of stress but were associated with mother's mental health concerns and their perceived levels of social support |
| Baumeister et al., (2008)[8]   | Peer victimization in children                                                                                  | To investigate psychosocial correlates of                                                                                                                                                         | 77 children and adolescents with learning                                                                                                                                                                          | All participants had a learning difficulties                                                                          | USA                                                                                                | Internalising/externalising symptoms measured by parents with the Child Behaviour                                                                                                                         | <b>Community-level:</b> Peer victimisation was measured by                                                                                                                                                                                                                                                                                                              | Cross-sectional. Pearson correlations were used                                                                                                                                                                                                       | Peer victimisation was positively correlated with parent reports of children's internalising                                                                                                                                                                                                                                                                                                                                                                                           |

| Author (Date)              | Title                                                                                                                                              | Aim of study                                                                                                                                                                   | Population                                                                                                                                                                                                             | Learning/Reading Difficulties                                                                                                                                | Context                                                                                                 | Mental Health Concept                                                                                                                                                                                                                                                                                                                     | Third factor of interest                                                                                                                                                                                                                | Methodology                                                                                                                        | Key findings                                                                                                                                                                                                                                                                                                                                                                                                                            |
|----------------------------|----------------------------------------------------------------------------------------------------------------------------------------------------|--------------------------------------------------------------------------------------------------------------------------------------------------------------------------------|------------------------------------------------------------------------------------------------------------------------------------------------------------------------------------------------------------------------|--------------------------------------------------------------------------------------------------------------------------------------------------------------|---------------------------------------------------------------------------------------------------------|-------------------------------------------------------------------------------------------------------------------------------------------------------------------------------------------------------------------------------------------------------------------------------------------------------------------------------------------|-----------------------------------------------------------------------------------------------------------------------------------------------------------------------------------------------------------------------------------------|------------------------------------------------------------------------------------------------------------------------------------|-----------------------------------------------------------------------------------------------------------------------------------------------------------------------------------------------------------------------------------------------------------------------------------------------------------------------------------------------------------------------------------------------------------------------------------------|
|                            | with learning disabilities                                                                                                                         | peer victimisation among children with learning disabilities                                                                                                                   | difficulties (5-18 years, <i>Male</i> = 11.3 years, 68 males) referred for either learning difficulties diagnosis or psychiatric assessment                                                                            | diagnosis but criteria for diagnosis were not further described. The researchers accessed their clinical case files to conduct the research                  |                                                                                                         | Check-List (CBCL; Achenbach, 1991) and behaviour/attentional difficulties with Connors Parents Rating Scale-Revised (Goyette et al., 1978). Children reported on depression and anxiety with the Children's Depression Inventory (CDI; Kovacs, 1992) and the Revised Children's Manifest Anxiety Scale (RCMAS; Reynolds & Richmond, 1978) | parent report with McCloskey and Stuewig's (2001) peer victimisation scale                                                                                                                                                              | to analyse associations between variables of interest                                                                              | and externalising symptoms and children's self-reports of depression symptoms                                                                                                                                                                                                                                                                                                                                                           |
| Benassi et al., 2020 [9]   | Impaired school well-being in children with Specific Learning Disorder and its relationship to psychopathological symptoms                         | To investigate the association between school well-being and children's mental health from the point of view of children and mothers                                           | 72 children (8-10 years, 52 without learning difficulties and 20 with learning difficulties) and their mothers. The SLD group comprised 16 males and 4 females and the control group comprised 27 males and 25 females | The learning difficulties diagnosis complied with ICD-10 guidelines. The number of children with reading difficulties was not reported                       | The children were recruited from 3 traditional schools within the Moderna district of Italy             | Parents reported on children's internalising/externalising symptoms with the Child Behaviour Checklist (CBCL; Achenbach, 1991; Achenbach & Rescorla, 2001).                                                                                                                                                                               | <b>Community-level:</b> school wellbeing was assessed by child and parent report with the Questionnaire on School Well-being (QBS; Tobia & Marzochi, 2015)                                                                              | Cross sectional. General linear models were applied                                                                                | There were closer associations between poor school wellbeing (struggles with learning and emotional problems at school) and higher levels of parent-reported internalising/externalising symptoms among children with learning difficulties, relative to those without any known learning difficulty, suggesting that school wellbeing may be a particularly salient factor in the mental health of children with learning difficulties |
| Blicher et al. (2017) [10] | The role of trait anxiety and preoccupation with reading disabilities of children and their mothers in predicting children's reading comprehension | To investigate how reading comprehension in children with reading disability is predicted by trait anxiety, and preoccupation with reading disability (both child and mothers) | The sample consisted of 88 children (grade 3-5, 55.7% boys) with word-reading difficulties and their mothers                                                                                                           | Children identified by school as having difficulties with basic reading and reading comprehension. The researchers then validated this by assessing children | The children were all in regular elementary school classes in Israel and were recruited from 12 schools | Children's trait anxiety was measured by self-report with the Hebrew version of the State-Trait Anxiety Inventory (STAI; Spielberger et al., 1975)                                                                                                                                                                                        | <b>Individual-level:</b> Children's pre-occupation (self-consciousness) with their reading difficulties was measured with the Pre-occupation with Reading Disability Questionnaire (PRDQ; Shaney et al., 2011).<br><b>Family-level:</b> | Cross-sectional. Pearson correlations followed by an analysis of direct and indirect effects using the PROCESS macro (Hayes, 2013) | Children's reading comprehension could be explained by their word reading ability, anxiety and their mother's preoccupation with their child's reading difficulties, but not maternal anxiety. Of interest to this review, children's trait anxiety was positively associated to their own and their mothers' preoccupation with their reading difficulties                                                                             |

| Author<br>(Date)            | Title                                                                                                         | Aim of study                                                                                                                                                                                 | Population                                                                                                                                                                                                     | Learning/Reading Difficulties                                                                                                                                          | Context                                                                                                                       | Mental Health Concept                                                                                                                                                                                                                                                                                                                                                     | Third factor of interest                                                                                                                                                                                                                                                                                                                                               | Methodology                                                                                                                                                                                                                                 | Key findings                                                                                                                                                                                                                                                                                                                                                                                                                                                                                                                                                                                                      |
|-----------------------------|---------------------------------------------------------------------------------------------------------------|----------------------------------------------------------------------------------------------------------------------------------------------------------------------------------------------|----------------------------------------------------------------------------------------------------------------------------------------------------------------------------------------------------------------|------------------------------------------------------------------------------------------------------------------------------------------------------------------------|-------------------------------------------------------------------------------------------------------------------------------|---------------------------------------------------------------------------------------------------------------------------------------------------------------------------------------------------------------------------------------------------------------------------------------------------------------------------------------------------------------------------|------------------------------------------------------------------------------------------------------------------------------------------------------------------------------------------------------------------------------------------------------------------------------------------------------------------------------------------------------------------------|---------------------------------------------------------------------------------------------------------------------------------------------------------------------------------------------------------------------------------------------|-------------------------------------------------------------------------------------------------------------------------------------------------------------------------------------------------------------------------------------------------------------------------------------------------------------------------------------------------------------------------------------------------------------------------------------------------------------------------------------------------------------------------------------------------------------------------------------------------------------------|
|                             |                                                                                                               |                                                                                                                                                                                              |                                                                                                                                                                                                                | on word-reading fluency                                                                                                                                                |                                                                                                                               |                                                                                                                                                                                                                                                                                                                                                                           | Mother's anxiety was measured with the STAI and their pre-occupation with their child's reading difficulties with a parent version of the PRDQ                                                                                                                                                                                                                         |                                                                                                                                                                                                                                             |                                                                                                                                                                                                                                                                                                                                                                                                                                                                                                                                                                                                                   |
| Boetsch et al., 1996 [11]   | Psychosocial correlates of dyslexia across the life span                                                      | Studies 2, 3 and 4 are of interest to this review as they focused on children and adolescents. The aim was to examine the psychosocial functioning of children and adolescents with dyslexia | The researchers chose three different samples of children (aged 10-12 years): a clinic-referred sample, a community sample, and a twin sample. All studies incorporated a "typically developing" control group | A formal dyslexia diagnosis with a discrepancy between reading/spelling performance and what would be expected based on their age, IQ, and educational experience      | USA                                                                                                                           | Children reported on their depression symptoms with the Dimensions of Depression Profile for Children and Adolescents (Harter & Nowakowski, 1987); and the Children's Depression Inventory (CDI; Kovacs, 1981). ADHD symptomology was measured in all three studies by the ADHD subscale of the Diagnostic Interview for Children and Adolescents (DICA; Herjanic, 1982). | <b>Individual-level:</b> Children reported on their self-worth with the Self-Perception Profile for Learning Disabled Students (Rennick & Harter, 1988). <b>Family/Community-level:</b> Children's perception of social support from friends, parents, teachers, and classmates (study 2 only) was measured with the Social Support Scale for Children (Harter, 1985). | Cross-sectional. For studies 2 and 4 two-way MANOVAs were conducted (dyslexic and non-dyslexic groups) and age (child and adolescent). For study 3 between-groups analyses consisted of paired sample T-tests to compare each pair of twins | Across all samples, children, and adolescents with dyslexia, relative to controls, reported lower global self-worth, lower academic self-competency, more depression symptomology and more (parent and child reported) ADHD symptoms. In clinic referred samples at least, children and adolescents with dyslexia reported being significantly less supported by parents, teachers, and peers than their typically achieving peers. Parents appeared to be more aware of externalising than internalising symptoms. There were no significant differences related to age or gender in the mental health variables |
| Bonifacci et al. (2016)[12] | Specific Learning Disorders: A look inside children's and parents' psychological well-being and relationships | To investigate the relationship between parent and child psychological profiles among a sample of children with learning difficulties                                                        | 34 triads (child, father, and mother) participated. A learning difficulties sub-sample of 17 children (Mage = 10.5 years +/- 1.6 yrs, 13 males) and a control group of 17 without                              | All children in the learning difficulties sub-sample had received a formal diagnosis of SLD-mixed type (i.e., at least two difficulty domains of reading, writing, and | Italy. Families of children with learning difficulties were recruited through a specialist assessment and intervention clinic | Both children and parents reported on children's internalising symptoms using the Test of Anxiety and Depression (TAD; Newcomer et al., 1995)                                                                                                                                                                                                                             | <b>Individual-level:</b> Children's self-esteem was measured by the Self-esteem Multidimensional Test (TMA; Bracken, 2003). <b>Family-level:</b> Parental stress was measured by the Parenting Stress Index (PSI; Abidin, 1995), parental                                                                                                                              | Cross-sectional. MANOVA's with group (SLD and control) and parent (mother and father) as between-subject factors                                                                                                                            | Parents of children with learning difficulties, relative to those without, reported higher levels of parenting stress but did not differ regarding mental health concerns. Children with learning difficulties reported significantly lower scholastic and inter-personal self-esteem but not higher levels of anxiety or depression, although they were rated as more anxious and                                                                                                                                                                                                                                |

| Author (Date)                | Title                                                                                                 | Aim of study                                                                                                                                                                         | Population                                                                                                                                                                                                                     | Learning/Reading Difficulties                                                                                                                                                                                         | Context | Mental Health Concept                                                                                                                                                                                                                                     | Third factor of interest                                                                                                                                                                                                                                                                                                                                                                                                                                                                                                                                                    | Methodology                                                                                                                                                                                                                                                                                                                 | Key findings                                                                                                                                                                                                                                                                                                                                                                                                                                     |
|------------------------------|-------------------------------------------------------------------------------------------------------|--------------------------------------------------------------------------------------------------------------------------------------------------------------------------------------|--------------------------------------------------------------------------------------------------------------------------------------------------------------------------------------------------------------------------------|-----------------------------------------------------------------------------------------------------------------------------------------------------------------------------------------------------------------------|---------|-----------------------------------------------------------------------------------------------------------------------------------------------------------------------------------------------------------------------------------------------------------|-----------------------------------------------------------------------------------------------------------------------------------------------------------------------------------------------------------------------------------------------------------------------------------------------------------------------------------------------------------------------------------------------------------------------------------------------------------------------------------------------------------------------------------------------------------------------------|-----------------------------------------------------------------------------------------------------------------------------------------------------------------------------------------------------------------------------------------------------------------------------------------------------------------------------|--------------------------------------------------------------------------------------------------------------------------------------------------------------------------------------------------------------------------------------------------------------------------------------------------------------------------------------------------------------------------------------------------------------------------------------------------|
|                              |                                                                                                       |                                                                                                                                                                                      | learning difficulties (Mage = 10.7 years, 9 males) and their parents participated                                                                                                                                              | mathematics). The number with reading difficulties was not described                                                                                                                                                  |         |                                                                                                                                                                                                                                                           | mental health measured by the Symptom-Checklist 90-Revised (SCL-90-R; Derogatis, 1983) and parenting practices (e.g., discipline styles) measured by the Parenting Scale (PS; Arnold et al., 1993)                                                                                                                                                                                                                                                                                                                                                                          |                                                                                                                                                                                                                                                                                                                             | depressed by their parents. Across the groups, there were associations between higher levels of children's depression and greater maternal stress, psychological difficulties, and ineffective disciplinary styles                                                                                                                                                                                                                               |
| Bonifacci et al., (2020)[13] | Rumination and emotional profile in children with Specific Learning Disorders (SLD) and their parents | To study whether children with SLD and their parents ruminate more than typically developing peers and whether rumination is associated with child and parent mental health concerns | 50 children and their parents (50 mothers and 50 fathers) were recruited, half with confirmed SLD (Mage = 10.08 years +/- 1.15 yrs) and a control group without SLD (Mage = 9.88 years +/- 0.53 yrs) matched by age and gender | Diagnosis was by full neurological assessment and conformed to ICD-10 criteria. 24% of the SLD group had a diagnosis of dyslexia, 4% dysorthographia (spelling), 16% dyscalculia and 56% had mixed learning disorders | Italy   | Children reported on their anxiety with the Multidimensional Anxiety Scale for Children (MASC; March et al., 1997). Parents reported on their children's psycho-social functioning with the Strengths and Difficulties Questionnaire (SDQ; Goodman, 1997) | <b>Individual-level:</b> Children reported on their coping strategies with the Response Style Questionnaire (CRSQ; Abela et al., 2004) and 3 emotional competencies: emotional control, emotional self-awareness, and situational responsiveness with the Emotion Regulation Index for Children and Adolescents (ERICA; MacDer-mott et al., 2010) and rumination with the Kid's Rumination Interview (KRI; Baiocco, R. et al., 2017) and their prosocial behaviour was assessed by parents with the relevant sub-scale of the SDQ. <b>Family-level:</b> parents reported on | Cross-sectional. MANOVAs were used to investigate group differences (SLD vs control) on the parent-reported child variables. Independent group Ttests (SLD vs control) were used to analyse the parent data. Pearson correlation analysed parent variables in association with child rumination but not child mental health | After Bonferroni corrections were applied there were no significant group differences in internalising/externalising symptoms, prosocial behaviour, peer problems, coping strategies, emotional competencies or generalised ruminative tendencies. However, children with SLD reported more rumination on a vignette related to teasing by peers and their mothers reported higher depression and parent's reported higher ruminative tendencies |

| Author (Date)            | Title                                                                                                                         | Aim of study                                                                                                                     | Population                                                                                                  | Learning/Reading Difficulties                                                | Context                                                                                                                                                                              | Mental Health Concept                                                                                                                                                                                                                                                                                                                                                    | Third factor of interest                                                                                                                                                                                                                                                                                                                                                                     | Methodology                                                                                                                                                       | Key findings                                                                                                                                                                                                                                                                                                                                                                                                                                                                                                                                                    |
|--------------------------|-------------------------------------------------------------------------------------------------------------------------------|----------------------------------------------------------------------------------------------------------------------------------|-------------------------------------------------------------------------------------------------------------|------------------------------------------------------------------------------|--------------------------------------------------------------------------------------------------------------------------------------------------------------------------------------|--------------------------------------------------------------------------------------------------------------------------------------------------------------------------------------------------------------------------------------------------------------------------------------------------------------------------------------------------------------------------|----------------------------------------------------------------------------------------------------------------------------------------------------------------------------------------------------------------------------------------------------------------------------------------------------------------------------------------------------------------------------------------------|-------------------------------------------------------------------------------------------------------------------------------------------------------------------|-----------------------------------------------------------------------------------------------------------------------------------------------------------------------------------------------------------------------------------------------------------------------------------------------------------------------------------------------------------------------------------------------------------------------------------------------------------------------------------------------------------------------------------------------------------------|
|                          |                                                                                                                               |                                                                                                                                  |                                                                                                             |                                                                              |                                                                                                                                                                                      |                                                                                                                                                                                                                                                                                                                                                                          | their emotion regulation with the Italian adaptation of the Rumination Response Scale (RRS; Nolen-Hoeksema & Morrow, 1989) and their mental health with a battery of standardised measures including the Penn State Worry Questionnaire (PSWQ; Meyer et al., 1995)<br><b>Community-level:</b> children's peer problems were measured by parent report with the relevant sub-scale of the SDQ |                                                                                                                                                                   |                                                                                                                                                                                                                                                                                                                                                                                                                                                                                                                                                                 |
| Boyes et al., (2020)[14] | Correlates of externalising and internalising problems in children with dyslexia: An analysis of data from clinical casefiles | To examine a range of hypothesised factors associated with internalising and externalising symptoms among children with dyslexia | The case files of 450 children and adolescents with dyslexia (age range 6-17 years, 58% male) were analysed | All formally diagnosed with dyslexia according to DSM-5 (APA, 2013) criteria | Australia. The case files were provided by the Dyslexia SPELD Foundation (DSF) a leading Western Australian provider of services to children and families with learning difficulties | Was assessed twofold. Firstly, by parent report on a single open-ended question during diagnostic interview. This was then dichotomised (0 = no behaviour difficulties and 1 = behaviour difficulties) for analysis. Secondly, further open-ended sections of the parent questionnaire were searched for reference to other emotional difficulties such as mood problems | <b>Individual-level:</b> Self-esteem, emotion regulation, social skills. <b>Family-level:</b> parent-child relationship. <b>Community-level:</b> peer problems, bullying victimisation, school support, child-teacher relationship, all measured by survey items in clinical interviews with parents                                                                                         | Cross-sectional data was analysed using two multiple regressions: one for internalising and one for externalising difficulties. Mediation models were then tested | Among children with dyslexia, inverse associations between self-esteem, emotion regulation, and social skills and positive associations between bullying victimisation and internalising and externalising symptoms were found. Additionally, peer relationship difficulties were indirectly associated with greater internalising/externalising symptoms via low self-esteem and emotion regulation difficulties. School and family factors were not significant in the multivariate analysis but teacher/parent-child relationship difficulties did correlate |

| Author (Date)               | Title                                                                                           | Aim of study                                                                                                       | Population                                                                                                                                                                | Learning/Reading Difficulties                                                                                                                       | Context                                                                                                                                                               | Mental Health Concept                                                                                                                                                                                                                                                                                                                                                                                                                                      | Third factor of interest                                                                                                                                                                                                                                                                  | Methodology                                                                                                                                                                                         | Key findings                                                                                                                                                                                                                                                                                                                                                                                                    |
|-----------------------------|-------------------------------------------------------------------------------------------------|--------------------------------------------------------------------------------------------------------------------|---------------------------------------------------------------------------------------------------------------------------------------------------------------------------|-----------------------------------------------------------------------------------------------------------------------------------------------------|-----------------------------------------------------------------------------------------------------------------------------------------------------------------------|------------------------------------------------------------------------------------------------------------------------------------------------------------------------------------------------------------------------------------------------------------------------------------------------------------------------------------------------------------------------------------------------------------------------------------------------------------|-------------------------------------------------------------------------------------------------------------------------------------------------------------------------------------------------------------------------------------------------------------------------------------------|-----------------------------------------------------------------------------------------------------------------------------------------------------------------------------------------------------|-----------------------------------------------------------------------------------------------------------------------------------------------------------------------------------------------------------------------------------------------------------------------------------------------------------------------------------------------------------------------------------------------------------------|
|                             |                                                                                                 |                                                                                                                    |                                                                                                                                                                           |                                                                                                                                                     |                                                                                                                                                                       |                                                                                                                                                                                                                                                                                                                                                                                                                                                            |                                                                                                                                                                                                                                                                                           |                                                                                                                                                                                                     | with mental health concerns in the bi-variate analysis                                                                                                                                                                                                                                                                                                                                                          |
| Camilleri et al. (2019)[15] | "They labelled me ignorant": Narratives of Maltese youth with dyslexia on national examinations | To explore the experiences of students with dyslexia within the context of sitting national examinations           | Research participants were 8 Maltese adolescents (aged approx. 15-16 years)                                                                                               | All had been formally assessed as having dyslexia                                                                                                   | Malta                                                                                                                                                                 | Stress, anxiety, in particular "test anxiety" was explored                                                                                                                                                                                                                                                                                                                                                                                                 | <b>Community-level:</b> Misunderstandings and lack of knowledge about dyslexia leading to inappropriate learning/assessment accommodation                                                                                                                                                 | Qualitative design. Participants were interviewed and transcripts were analysed thematically using a discourse analysis approach                                                                    | The researcher identified that a perception of a lack of understanding about the needs of people with dyslexia contributed to stress and anxiety in this high-stakes assessment situation                                                                                                                                                                                                                       |
| Capozzi et al. (2008)[16]   | Psychiatric comorbidity in learning disorder: Analysis of family variables                      | To evaluate the role of parenting style on the mental health of children with Learning Disability (LD)             | The sample consisted of 56 children (7-12 years, 44 boys and 12 girls) and their parents                                                                                  | Children were all diagnosed with a learning disability. The number with dyslexia was not described                                                  | Italy. Children were recruited via a health clinic where they had all been assessed for school-related problems                                                       | Parents reported on children's internalising/externalising symptoms with the Child Behaviour Checklist (CBCL; Achenbach, 1991)                                                                                                                                                                                                                                                                                                                             | <b>Family-level:</b> Parent's reported on the child-parent relationships with the Attachment Style Questionnaire (ASQ; Feeney et al., 1994) and parenting practices with the Family Attitudes Questionnaire - Italian Version (FAQ; Duszynski, 1974; Pecci et al., 2003)                  | Cross-sectional design. Stepwise regressions were used to analyse the data with internalising and externalising symptoms as outcome variables and the various family factors as predictor variables | "Pathological" levels of internalising, relative to externalising, symptoms were reported by parents. Children's attachment insecurity with parents (differentially for father and mothers) was associated with higher levels of internalising/externalising symptoms                                                                                                                                           |
| Carroll et al. (2005)[17]   | Literacy difficulties and psychiatric disorders: Evidence for comorbidity                       | To investigate the nature and specificity of links between specific literacy difficulties and psychiatric disorder | A representative sample of 5752, 5-15-year-old British (England, Scotland and Wales) children and adolescents (68 girls and 221 boys classified with learning difficulty) | The 5% of children (9 years and older) whose reading or spelling scores were furthest below their predicted scores based on their vocabulary scores | United Kingdom. The researchers gathered their data from the 1999 national survey of child mental health carried out by the UK office for National Statistics in 1999 | Parents and teachers reported on internalising/externalising symptoms with the Strengths and Difficulties Questionnaire (SDQ; Gooman, 1997) and the childhood psychiatric disorders with the Development and Well-being Assessment (DAWBA; Goodman et al., 2000). In addition, children aged 11 years and older completed the Short Mood and Feelings Questionnaire (SMFQ; Angold et al., 1995) which contains items reflecting the symptoms of depression | <b>Family-level:</b> Of interest to this review parents reported on family functioning with the McMaster Family Activity Device (Miller et al., 1985) and mothers reported on their level of maternal distress using the General Health Questionnaire (GHQ-12; Godlberg & Williams, 1988) | Cross-sectional design. Data was analysed with ANOVA and regression models                                                                                                                          | Attentional difficulties appeared to mediate links between literacy difficulties and higher levels of externalising symptoms as well as children's own reports of "low mood", but anxiety could not be explained by co-occurring attentional difficulties. Of note to this review, in this study literacy difficulties were not associated with higher levels of maternal distress or poorer family functioning |

| Author (Date)                     | Title                                                                                                     | Aim of study                                                                                                                                                       | Population                                                                                                                                                                             | Learning/Reading Difficulties                                                                                                                    | Context                                                                                                                                                                                                                      | Mental Health Concept                                                                                                                                                                                                                                                                                                              | Third factor of interest                                                                                                                                                                                                   | Methodology                                                                                              | Key findings                                                                                                                                                                                                                                                                                                                                                                                                                                                                                                                                                                                                                                              |
|-----------------------------------|-----------------------------------------------------------------------------------------------------------|--------------------------------------------------------------------------------------------------------------------------------------------------------------------|----------------------------------------------------------------------------------------------------------------------------------------------------------------------------------------|--------------------------------------------------------------------------------------------------------------------------------------------------|------------------------------------------------------------------------------------------------------------------------------------------------------------------------------------------------------------------------------|------------------------------------------------------------------------------------------------------------------------------------------------------------------------------------------------------------------------------------------------------------------------------------------------------------------------------------|----------------------------------------------------------------------------------------------------------------------------------------------------------------------------------------------------------------------------|----------------------------------------------------------------------------------------------------------|-----------------------------------------------------------------------------------------------------------------------------------------------------------------------------------------------------------------------------------------------------------------------------------------------------------------------------------------------------------------------------------------------------------------------------------------------------------------------------------------------------------------------------------------------------------------------------------------------------------------------------------------------------------|
| Casey et al., 1992[18]            | Impaired emotional health in children with mild reading disability                                        | To investigate the impact of reading difficulties on children's self-esteem and emotional health                                                                   | 28 children (aged 8-12 years) met criteria for the reading disorder group. A control group of 39 without any known learning difficulty were recruited through routine health screening | All children with reading difficulties met DSM-3 criteria for developmental reading disorder                                                     | USA. The students with reading difficulties were all attending a tailored school summer camp, and were described as experiencing "mild" reading difficulties and coming from supportive home environments of high SES status | Parents reported on their children's mental health with the Rand Mental Health Index (Eisen et al., 1980) which has three sub-scales: anxiety, depression, and positive wellbeing. Parents also reported on children's internalising/externalising symptoms with the Child Behaviour Checklist (CBCL; Achenbach, 1978/79 versions) | <b>Individual-level:</b> Both parents and children reported on their self-perceptions using the relevant versions of Harter's Self-Perception Profile (Harter, 1982)                                                       | Cross sectional. Group comparison study                                                                  | Children with dyslexia, relative to peers without learning difficulties, reported lower levels of scholastic self-competence but not other domains of self-competence. No significant group differences in internalising/externalising behaviour on the CBCL were found, however, higher levels of anxiety and lower levels of well-being were reported by parents of children with dyslexia, relative to those without learning difficulties, on the Rand Mental Health Survey. The researchers concluded that children with reading difficulties were at risk of poor self-esteem and poor emotional health despite having supportive home environments |
| Cen & Aytac (2017)[19]            | Ecocultural perspective in learning disability: Family support resources, values, child problem behaviors | To investigate associations between mother's perceived social support resources, values, and children's "problem behaviors" (internalising/externalising symptoms) | Ninety children and adolescents with learning difficulties (7-14 years, 42 girls and 48 boys), their mothers and teachers                                                              | All diagnosed with learning difficulty through previous psych-educational assessments. No break-down of numbers with reading difficulty reported | Turkey                                                                                                                                                                                                                       | Internalising/externalising symptoms measured by teacher-report with the Child Behaviour Problem Scale (Kanner, 2007)                                                                                                                                                                                                              | <b>Family-level:</b> Mother's reported on their level of family social support with the Family Support Scale (Kanner, 2003) and their parenting values with the Portrait Values Questionnaire (PVQ; Schwartz et al., 2001) | Cross sectional. Pearson correlation, regression analysis, and Haye's moderation analysis were conducted | After controlling for severity level of learning difficulty (teacher reported) there was some evidence of parental values (openness to change and "conservation" (secure home environment) and aspects of mothers' perceived social support (informational support) being associated with less internalising symptoms among children and mother's perceived emotional support being associated with less externalising symptoms among children                                                                                                                                                                                                            |
| Chiapeddi & Baschenis (2016) [20] | Specific learning disorders and anxiety: A matter of                                                      | To investigate associations between anxiety among children                                                                                                         | 20 children and adolescents (aged 8-13) with SLD and 32                                                                                                                                | SLD diagnosed according to ICD-10 criteria. No description                                                                                       | Italy. The SLD group were recruited via a health centre.                                                                                                                                                                     | Children reported on their anxiety with the Anxiety sub-scale of the Self-administered Psychiatric Scales (SAFA-A; Ciancetti et                                                                                                                                                                                                    | <b>Community-level:</b> Perceived support from teachers was measured by a                                                                                                                                                  | Cross-sectional data was analysed by Mann Whitney Utest                                                  | As predicted children with SLD reported significantly higher anxiety than the control group. Further, children with SLD who                                                                                                                                                                                                                                                                                                                                                                                                                                                                                                                               |



| Author (Date)                | Title                                                                         | Aim of study                                                                                                        | Population                                                                                                                                                                                                                                                          | Learning/Reading Difficulties                                                                                                                                        | Context                                                | Mental Health Concept                                                                                                                  | Third factor of interest                                                                                                                               | Methodology                                                                                                                             | Key findings                                                                                                                                                                                                                                                                                                                                                                                                                                                                       |
|------------------------------|-------------------------------------------------------------------------------|---------------------------------------------------------------------------------------------------------------------|---------------------------------------------------------------------------------------------------------------------------------------------------------------------------------------------------------------------------------------------------------------------|----------------------------------------------------------------------------------------------------------------------------------------------------------------------|--------------------------------------------------------|----------------------------------------------------------------------------------------------------------------------------------------|--------------------------------------------------------------------------------------------------------------------------------------------------------|-----------------------------------------------------------------------------------------------------------------------------------------|------------------------------------------------------------------------------------------------------------------------------------------------------------------------------------------------------------------------------------------------------------------------------------------------------------------------------------------------------------------------------------------------------------------------------------------------------------------------------------|
|                              | school experience?                                                            | with learning difficulties and their school experience (namely perceived level of support from their teachers)      | same-aged typically developing peers                                                                                                                                                                                                                                | of how many children had dyslexia                                                                                                                                    | The control group were recruited from one local school | al., 2001) which measures: generalised anxiety, worry about the future, social anxiety, separation anxiety, and school-related anxiety | single survey item. Children with SLD were asked: "Do you think that your teachers were able to understand your disorder and help you?"                | and Spearman's Rho                                                                                                                      | perceived their teacher as understanding and caring had lower levels on all domains of anxiety                                                                                                                                                                                                                                                                                                                                                                                     |
| Claessen et al., (2020)[21]  | Educators' perceptions of the impact of reading difficulties for young people | To further understand about risk and protective factors for the wellbeing of children with reading difficulties     | 20 educators who all had a minimum of 2 years classroom experience and currently working with children aged 5-18 with reading difficulties                                                                                                                          | The children described had to have been identified as having persistent reading difficulties                                                                         | Perth, Western Australia                               | Mental health was constructed as comprising of both internalising and externalising symptoms and explored thematically                 | <b>Individual-level:</b> responses to diagnosis, in particular feelings of shame.<br><b>Community-level:</b> social stigma (i.e., feeling "different") | Qualitative. A phenomenological approach was taken and Braun and Clarke's (2006) approach to thematic analysis used to analyse the data | Stigma related to feelings of shame and difference were identified as possible risk factors to children's mental health                                                                                                                                                                                                                                                                                                                                                            |
| Dahle et al. (2011)[22]      | Coexisting problem behaviour in severe dyslexia                               | To better understand internalising and externalising symptoms in dyslexia in different settings (e.g., home/school) | A group of 70 children and adolescents (59 boys, 11 girls, Mage = 150.49 months) with severe dyslexia and a control of 70 children (pair-wise matched on age, gender, cognitive level, and rural/urban context) without reading difficulties (Mage = 101.31 months) | Diagnosis of dyslexia based on phonological difficulties. Nine children in the reading difficulties group also had an ADHD diagnosis and 1 had a Tourette's syndrome | Norway.                                                | Parent, teacher, and child reports using the Child Behaviour Checklist (Achenbach & Rescorla, 2001)                                    | <b>Community-level:</b> Of interest to this review, children's social problems were also assessed from multiple perspectives with the CBCL             | Cross-sectional. Group comparison design.                                                                                               | Dyslexia was strongly associated with higher levels of internalising symptoms in this sample, more than externalising symptoms. Parents reported higher levels of internalizing symptoms than teachers. Teachers, but not the children themselves, appeared to identify social problems among the students with dyslexia and all were boys. The study highlighted the importance of considering the context (school/home) when considering children's socio-emotional difficulties |
| Dahle & Knivsberg (2014)[23] | Internalizing, externalizing, and attention                                   | To investigate dyslexia-related group differences in                                                                | Twenty-six 9–10-year-old children with dyslexia (Mage = 9                                                                                                                                                                                                           | Dyslexia was determined based on poor performance                                                                                                                    | Students all came from mainstream                      | Internalising/externalising behaviour reported by teachers and parents with the Child                                                  | <b>Community-level:</b> Social problems also assessed using teacher and parent                                                                         | Cross-sectional                                                                                                                         | Parents and teachers reported a higher level of internalising and externalising difficulties in the dyslexia group relative to                                                                                                                                                                                                                                                                                                                                                     |

| Author (Date)                        | Title                                                                                                                       | Aim of study                                                                                                                                     | Population                                                                                               | Learning/Reading Difficulties                                                                                                     | Context                                                                                                                   | Mental Health Concept                                                                                                                                                                                                                | Third factor of interest                                                                                                                                                                                                                                                                                                                                                                                                                                                        | Methodology                                                                                                   | Key findings                                                                                                                                                                                                                                    |
|--------------------------------------|-----------------------------------------------------------------------------------------------------------------------------|--------------------------------------------------------------------------------------------------------------------------------------------------|----------------------------------------------------------------------------------------------------------|-----------------------------------------------------------------------------------------------------------------------------------|---------------------------------------------------------------------------------------------------------------------------|--------------------------------------------------------------------------------------------------------------------------------------------------------------------------------------------------------------------------------------|---------------------------------------------------------------------------------------------------------------------------------------------------------------------------------------------------------------------------------------------------------------------------------------------------------------------------------------------------------------------------------------------------------------------------------------------------------------------------------|---------------------------------------------------------------------------------------------------------------|-------------------------------------------------------------------------------------------------------------------------------------------------------------------------------------------------------------------------------------------------|
|                                      | problems in dyslexia                                                                                                        | behavioural/emotional problems                                                                                                                   | years and 8 months) and 26 without (Mage = 9 years and 10 months)                                        | (lowest 20% of students) on standardised tests of word reading and spelling                                                       | schools in rural Norway                                                                                                   | Behaviour CheckList (CBCL; Achenbach & Rescorla, 2001)                                                                                                                                                                               | reports on the social problems sub-scale of the CBCL                                                                                                                                                                                                                                                                                                                                                                                                                            |                                                                                                               | controls but only the teacher ratings reached significance. Teachers rated the children with dyslexia as having more social problems and aggressive behaviors than children without any known learning difficulty                               |
| D'Amico & Guastaferrero, (2017) [24] | Emotional and meta-emotional intelligence as predictors of adjustment problems in students with Specific Learning Disorders | To investigate the effect of severity level of SLD and emotional intelligence on the psycho-social wellbeing of adolescents with a diagnosed SLD | 34 Italian adolescents (14-19 years, 25 male, Mage=16 years) with an SLD and their parents participated  | All adolescents met DSM-4 criteria (APA, 1994) for an SLD. Of these, 20 of the total sample self-reported difficulties in reading | Italy. Participants were contacted through their schools and assessed using the Italian language versions of all measures | Internalising, externalising and total "problem behaviour" was measured by children with the Italian version of the Youth Self-Report (aged 11-18 years) and parent version of the Child Behaviour Checklist (CBCL; Achenbach, 1991) | <b>Individual-level:</b> Emotional intelligence was measured by the Intelligenza Emotiva: Ability, Credenze e Concetto Do Se Mata-Emotiva (IE-ACCME, D'Amico, 2013) a self-report scale with 3 sub-scales purporting to measure: beliefs about emotions; self-concept about emotional abilities (e.g., "I am able to identify the emotions that derive from particular physical sensations"); and emotional abilities (through responses to emotion problem vignettes) (p. 21). | Cross-sectional. Correlational analysis followed by multiple linear regressions were used to analyse the data | The results suggest that emotional beliefs, emotional self-concepts, and emotional intelligence are positively associated with the mental health (especially fewer internalising symptoms) of children with learning difficulties               |
| DeBrew (2017)[25]                    | Who will help my son? A family's journey with dyslexia                                                                      | A case study approach was used to explore the role of mental health nurses in the care of children with                                          | Case study of a parent perspective. A personal account from one mother who is also a mental health nurse | The child presented with early reading difficulties and was later diagnosed with dyslexia                                         | USA                                                                                                                       | School anxiety was explored                                                                                                                                                                                                          | <b>Individual-level:</b> self-worth and <b>Family/community-level:</b> parental/teacher support. <b>Community-level:</b> Stigma and teacher (mis)understanding                                                                                                                                                                                                                                                                                                                  | Qualitative design: a single case study                                                                       | A call to action for mental health nurses to be aware of the socio-emotional needs of children with dyslexia and their families. Greater school anxiety was related to teacher misunderstanding and lower self-esteem (i.e., "feeling stupid"); |

| Author (Date)             | Title                                                                                                      | Aim of study                                                                                        | Population                                                                                                                       | Learning/Reading Difficulties                                                                                                                                                                                                                                | Context                                                                                                                                                                                  | Mental Health Concept                                                                                                                                                                                                                              | Third factor of interest                                                                                                                                                                                                                                                                               | Methodology                                                                           | Key findings                                                                                                                                                                                                                                                                                                                                                                                                                                                                                                                                                                                                                                                                                        |
|---------------------------|------------------------------------------------------------------------------------------------------------|-----------------------------------------------------------------------------------------------------|----------------------------------------------------------------------------------------------------------------------------------|--------------------------------------------------------------------------------------------------------------------------------------------------------------------------------------------------------------------------------------------------------------|------------------------------------------------------------------------------------------------------------------------------------------------------------------------------------------|----------------------------------------------------------------------------------------------------------------------------------------------------------------------------------------------------------------------------------------------------|--------------------------------------------------------------------------------------------------------------------------------------------------------------------------------------------------------------------------------------------------------------------------------------------------------|---------------------------------------------------------------------------------------|-----------------------------------------------------------------------------------------------------------------------------------------------------------------------------------------------------------------------------------------------------------------------------------------------------------------------------------------------------------------------------------------------------------------------------------------------------------------------------------------------------------------------------------------------------------------------------------------------------------------------------------------------------------------------------------------------------|
|                           |                                                                                                            | dyslexia and their families                                                                         |                                                                                                                                  |                                                                                                                                                                                                                                                              |                                                                                                                                                                                          |                                                                                                                                                                                                                                                    |                                                                                                                                                                                                                                                                                                        |                                                                                       | family support is highlighted as protective                                                                                                                                                                                                                                                                                                                                                                                                                                                                                                                                                                                                                                                         |
| de Lima et al. (2020)[26] | Behavior problems and depressive symptoms in developmental dyslexia: Risk assessment in Brazilian students | To compare students with and without dyslexia on behavioral problems and depressive symptoms        | Sixty-one children and adolescents (aged 7–14 years) including 31 with a dyslexia diagnosis and 30 without learning difficulties | The dyslexia group met DSM-5 diagnostic criteria                                                                                                                                                                                                             | Brazil                                                                                                                                                                                   | Internalising/externalising symptoms measured by parent report with the Child Behaviour Checklist (CBCL; Achenbach & Rescorla, 2004) and child depression measured by self-report with the Children's Depression Inventory (CDI; Kovacs, 1981)     | <b>Community-level:</b> parents also reported on children's social problems with the CBCL                                                                                                                                                                                                              | Cross-sectional                                                                       | Students with dyslexia, relative to those without learning difficulties, had more self-reported depressive symptoms and higher levels of parent-reported social problems and internalising and externalising symptoms                                                                                                                                                                                                                                                                                                                                                                                                                                                                               |
| Eissa (2010)[27]          | Behavioral and emotional problems associated with dyslexia in adolescence                                  | To examine the emotional and behavioural difficulties associated with dyslexia                      | The sample consisted of fifty-six adolescents, 12–18 olds, 35 with reading difficulties and 21 typical readers matched by age    | All adolescents in the reading group had a reading disability (dyslexia) in accordance with ICD-10 and DSM-4 criteria. The researchers noted that they all were without pre-existing psychopathology or a history of premature birth, head injury or seizure | Country of origin unknown. Participants in the reading difficulties group had typically been referred for assessment by their parent/teacher due to behavioural and/or learning concerns | Adolescents reported on their mental health with three standardised measures: The Youth Self Report of the Child Behaviour Checklist (version unstated) and the Hamilton rating scales of depression (Hamilton, 1960) and anxiety (Hamilton, 1959) | The adolescents also took part in a semi-structured interview in which they reported on; <b>Individual-level:</b> self-esteem, and <b>Community-level:</b> success/failure at school, feelings of well-being at school, the impact of dyslexia on school achievements, and peer relationships/bullying | Mixed methods design using cross-sectional qualitative and quantitative data          | Adolescents with reading difficulties, relative to their typically reading peers, evidenced higher levels of both internalising (anxiety and depression) and externalising difficulties and poor overall self-esteem. Internalising and externalising symptoms correlated suggesting to the researcher that some children "act out" when anxious/depressed. The interview data suggested that poor school achievement contributed to negative self-esteem but that school was "tolerable" to most participants due to having good friends. It seemed that good friendships compensated for their academic difficulties. Some reported having been bullied due to their reading/writing difficulties |
| Fussell et al. (2005)[28] | Social skills and behavior problems in children with disabilities with and without siblings                | To examine social skills and behaviour problems and the influence of siblings among children with a | A clinical sample of 85 children and adolescents (6–15.6 years, 58 males) and a corresponding                                    | Of the total sample, 42 (approx. 50%) had a learning difficulties diagnosis (with or without co-                                                                                                                                                             | South Carolina, USA                                                                                                                                                                      | Parents and teachers reported on children's internalising and externalising symptoms with the relevant versions of the Child Behaviour Checklist (CBCL; Achenbach, 1991)                                                                           | <b>Individual-level:</b> Social skills measured by parent-report with the Social Skills Rating Scale (SSRS; Gresham & Elliot, 1990).                                                                                                                                                                   | Cross-sectional. ANOVA was used to compare the disability groups on the key variables | Children with learning difficulties only were higher in internalising than externalising symptoms. There was no significant effect of siblings on the psycho-social measures. The influence of social skills on                                                                                                                                                                                                                                                                                                                                                                                                                                                                                     |

| Author (Date)              | Title                                                                                                                                 | Aim of study                                                                                                                                                                       | Population                                                                                                                                                                                                                                                                                                                                              | Learning/Reading Difficulties                                                                                                                                                                                      | Context                                                              | Mental Health Concept                                                                                                                                                       | Third factor of interest                                                                                                                                                                                                                                                                                                                                                                                                             | Methodology                                                                                                                                 | Key findings                                                                                                                                                                                                                                                                                                                                                                                                                                        |
|----------------------------|---------------------------------------------------------------------------------------------------------------------------------------|------------------------------------------------------------------------------------------------------------------------------------------------------------------------------------|---------------------------------------------------------------------------------------------------------------------------------------------------------------------------------------------------------------------------------------------------------------------------------------------------------------------------------------------------------|--------------------------------------------------------------------------------------------------------------------------------------------------------------------------------------------------------------------|----------------------------------------------------------------------|-----------------------------------------------------------------------------------------------------------------------------------------------------------------------------|--------------------------------------------------------------------------------------------------------------------------------------------------------------------------------------------------------------------------------------------------------------------------------------------------------------------------------------------------------------------------------------------------------------------------------------|---------------------------------------------------------------------------------------------------------------------------------------------|-----------------------------------------------------------------------------------------------------------------------------------------------------------------------------------------------------------------------------------------------------------------------------------------------------------------------------------------------------------------------------------------------------------------------------------------------------|
|                            |                                                                                                                                       | range of disabilities                                                                                                                                                              | parent were recruited from a hospital-based paediatric clinic                                                                                                                                                                                                                                                                                           | morbidity (ADHD). The number with dyslexia was not reported                                                                                                                                                        |                                                                      |                                                                                                                                                                             |                                                                                                                                                                                                                                                                                                                                                                                                                                      |                                                                                                                                             | internalising/externalising behaviour was not assessed                                                                                                                                                                                                                                                                                                                                                                                              |
| Gadeyne et al. (2004)[29]  | Psychosocial functioning of young children with learning problems                                                                     | To investigate psycho-social functioning among children with diagnosed learning difficulties relative to those with poor academic performance but no diagnosed learning difficulty | The sample consisted of 276 children (aged 6-7 years, 139 boys and 137 girls). The researchers formed three groups for comparison: a group with low academic achievement but no known learning disability, a group with a learning disability based on IQ-achievement discrepancy and a group with learning disability based on achievement discrepancy | The researchers formed the groups of children with Learning Disability using a well-used multi-stage procedure (Reynolds, 1994). Compared children with reading/spelling difficulties and mathematics difficulties | Children were from mainstream schools in a rural area of Belgium     | Internalising/externalising symptoms measured by parent and teacher report with the Child Behaviour Checklist (CBCL; Achenbach, 1991)                                       | As the children were quite young the researchers used pictorial measures which were based on standardised measures of all variables of interest. <b>Individual-level:</b> children's self-concept and motivation for academic work and <b>Community-level:</b> Children's views on their social relationships were measured. Teachers and parents also reported on children's social problems with the relevant subscale of the CBCL | Cross-sectional. ANOVA and MANOVA used to analyse the data                                                                                  | Children with reading/spelling difficulties and children with low academic achievement differed most from controls on the range of psycho-social difficulties. However, low cognitive self-concept seemed to be most related to academic achievement rather than learning disability whereas social difficulties were related to learning difficulties and children with low academic achievement seemed prone to problems with academic motivation |
| Gallegos et al. (2012)[30] | Anxiety, depression, and coping skills among Mexican school children: A comparison of students with and without learning disabilities | To compare the severity and risk status for anxiety and depression and coping skills among children with and without learning difficulties                                         | 260 children (130 with learning difficulties and 130 without learning difficulties, 9-12 years)                                                                                                                                                                                                                                                         | Children with learning difficulties were identified by school records which were then evaluated by a multidisciplinary team to determine                                                                           | Mexico. Participants were recruited from 8 randomly selected schools | Children reported on their mental health with the Spanish versions of the Spence Anxiety Scale (SCAS; Spence, 1997) and Children's Depression Inventory (CDI; Kovacs, 1981) | <b>Individual-level:</b> Children reported on their coping strategies with the Coping Skills Questionnaire (CA; Hernandez-Guzman, 2003) a 12-item scale to measure children's interpretation                                                                                                                                                                                                                                         | Cross-sectional. Independent samples T-tests were performed to compare children's coping skills with their levels of anxiety and depression | Children with learning difficulties reported significantly higher levels of anxiety and depression symptoms but no statistically significant group differences were reported on coping strategies                                                                                                                                                                                                                                                   |

| Author<br>(Date)              | Title                                                                                               | Aim of study                                                                                                                                                                                                                | Population                                                                                                                             | Learning/Reading Difficulties                                                                                                                 | Context                                                                           | Mental Health Concept                                                                                                                                                       | Third factor of interest                                                                                                                                                                                                                                                                                                                                                                                                                                                                                                                                                                                                                        | Methodology                                                                             | Key findings                                                                                                                                                                                                                                                                                                   |
|-------------------------------|-----------------------------------------------------------------------------------------------------|-----------------------------------------------------------------------------------------------------------------------------------------------------------------------------------------------------------------------------|----------------------------------------------------------------------------------------------------------------------------------------|-----------------------------------------------------------------------------------------------------------------------------------------------|-----------------------------------------------------------------------------------|-----------------------------------------------------------------------------------------------------------------------------------------------------------------------------|-------------------------------------------------------------------------------------------------------------------------------------------------------------------------------------------------------------------------------------------------------------------------------------------------------------------------------------------------------------------------------------------------------------------------------------------------------------------------------------------------------------------------------------------------------------------------------------------------------------------------------------------------|-----------------------------------------------------------------------------------------|----------------------------------------------------------------------------------------------------------------------------------------------------------------------------------------------------------------------------------------------------------------------------------------------------------------|
|                               |                                                                                                     |                                                                                                                                                                                                                             |                                                                                                                                        | group membership. The number with reading difficulties was not described                                                                      |                                                                                   |                                                                                                                                                                             | and reaction to problem situations in terms of: active coping, emotional coping, and passive/avoidant coping                                                                                                                                                                                                                                                                                                                                                                                                                                                                                                                                    | symptoms by group                                                                       |                                                                                                                                                                                                                                                                                                                |
| Giovagnoli et al., (2020)[31] | Internalizing symptoms in developmental dyslexia: A comparison between primary and secondary school | The article reported on two studies. The second is of interest to this review. The aim of this study was to explore a range of factors associated with internalising symptoms among secondary school students with dyslexia | Study 2 included 44 adolescents (42 males) with a diagnosis of dyslexia and 54 age-matched controls (39 males) <i> Mage</i> 14.9 years | Formal diagnosis of dyslexia was required for group membership. This was then validated through reading tests administered by the researchers | Italy. All students with dyslexia came from one upper-secondary technical college | Internalising symptoms were measured by the Italian version of the Youth Self-Report (aged 11-18 years) of the Child Behaviour Checklist (YSR-CBCL; Achenbach et al., 2001) | <b>Individual-level:</b> Children reported on their coping strategies with the Italian version of the Melbourne Decision Making Questionnaire (MDMQ; Nota & Soresi, 2000) which measures 4 decision-making styles: Avoidance of problem; Procrastination in dealing with problems; Vigilance; and Hyper-vigilance (having "excessive alertness" toward problem situations at school (p. 461); their school and social competence with the YSR-CBCL; and their Quality of Life (QuoL) with the Clipper test (Soresi & Nota, 2003); sense of autonomy, sense of self-sufficiency, perceived self-efficacy (related to school experiences mainly). | Cross-sectional design. Several generalised linear models were used to analyse the data | Higher levels of internalising symptoms among adolescents with dyslexia were associated with peer difficulties, low levels of self-efficacy, and more hyper-vigilance at school. Family factors, and school wellbeing ("satisfaction with school") did not appear to be associated with internalising symptoms |

| Author (Date)              | Title                                                                                                                                      | Aim of study                                                                                                                                                                                                    | Population                                                                                                                                                                                                 | Learning/Reading Difficulties                                                                                                                                                                                           | Context                                                           | Mental Health Concept                                                                                                                                                                                                                                                                                         | Third factor of interest                                                                                                                                                                                                                                                                                                                                                                                                                     | Methodology                                                                                                                                                                     | Key findings                                                                                                                                                                                                                                                                                                                                                                                                                                              |
|----------------------------|--------------------------------------------------------------------------------------------------------------------------------------------|-----------------------------------------------------------------------------------------------------------------------------------------------------------------------------------------------------------------|------------------------------------------------------------------------------------------------------------------------------------------------------------------------------------------------------------|-------------------------------------------------------------------------------------------------------------------------------------------------------------------------------------------------------------------------|-------------------------------------------------------------------|---------------------------------------------------------------------------------------------------------------------------------------------------------------------------------------------------------------------------------------------------------------------------------------------------------------|----------------------------------------------------------------------------------------------------------------------------------------------------------------------------------------------------------------------------------------------------------------------------------------------------------------------------------------------------------------------------------------------------------------------------------------------|---------------------------------------------------------------------------------------------------------------------------------------------------------------------------------|-----------------------------------------------------------------------------------------------------------------------------------------------------------------------------------------------------------------------------------------------------------------------------------------------------------------------------------------------------------------------------------------------------------------------------------------------------------|
| Goldston et al. (2007)[32] | Reading problems, psychiatric disorders, and functional impairment from mid-to-late adolescence                                            | To investigate whether functional impairment and psychiatric morbidity differ between adolescents with and without reading difficulties                                                                         | The sample consisted of 188 adolescents (55% male, ethnically diverse) 94 with poor reading skills and 94 with typical reading skills recruited from a larger sample of 15-year old public school students | The reading difficulties group were those with raw scores of 45 or below on the word-reading sub-test of the Woodcock-Johnson Psycho-educational Battery Revised (Woodcock and Johnson, 1990)                           | USA. The students were recruited from 4 urban and 2 rural schools | Psychiatric disorders (affective disorders, ADHD, conduct and oppositional disorders, substance use disorders) were assessed by child and parent report with the Schedule for Affective Disorders and Schizophrenia for School-age children Epidemiological version (K-SADS-E; Orvaschel & Puig-Antich, 1994) | <b>Family/Community-level:</b> satisfaction with school experience, satisfaction in relationships and support from peers and family<br><br><b>Individual-level:</b> Children's "functional impairment" was assessed with the Child and Adolescent Functional Assessment Scale (CAFAS; Hodges, 1997). This tool measures impairment in five domains: role functioning, behaviour towards others, mood/self-harm, substance abuse and thinking | Longitudinal design, adolescents only.                                                                                                                                          | Adolescents with reading difficulties, relative to typical readers, evidenced higher rates of functional impairment and anxiety disorders even after controlling for co-morbid ADHD, in particular, generalised anxiety and social anxiety (5 times more prevalent) and difficulties in regard to "behaviour towards others" although rates of externalising disorders (conduct and oppositional disorders) did not vary significantly between the groups |
| Granot (2016) [33]         | Socioemotional and behavioural adaptation of students with disabilities: The significance of teacher-student attachment-like relationships | To explore the extent to which children's attachment to their mothers and teachers explains the socio-emotional well-being of children with ADHD, Learning difficulties, or combined ADHD-learning difficulties | 65 teacher/child dyads including 25 children and adolescents (8–14 years) with learning difficulties (LD), 20 with Attention Deficit Hyperactivity Disorder (ADHD), and 20 with both ADHD/LD               | LD was diagnosed based on achievement at least 2 years below that expected for grade level with no intellectual, sensory, neurological, or socio-cultural explanation. The number with reading difficulty within the LD | Northern Israel                                                   | Children's internalising/externalising symptoms were assessed by teacher report using the Teacher-Child Rating Scale (TCRS; Hightower et al., 1986)                                                                                                                                                           | <b>Family/Community-level:</b> Children's perception of their attachment to mothers was assessed by the ASS (Kernes et al., 1996) and attachment to teachers with the CATSBS (Al-Yagon & Mikulincer, 2006). The full name of these measures was not provided                                                                                                                                                                                 | Cross-sectional. A series of regressions were used to identify the contribution of the child-mother, child-teacher attachment relationship to children's psychosocial wellbeing | Greater maternal attachment was associated with reduced child internalising symptoms across the groups. Similarly, secure child-teacher attachment was associated with reduced externalising symptoms                                                                                                                                                                                                                                                     |

| Author (Date)                      | Title                                                                                                   | Aim of study                                                                                                                                                                                                                                                   | Population                                                                                                                   | Learning/Reading Difficulties                                                                                                                                                                                 | Context                                                                                                                                                                                                               | Mental Health Concept                                                                                                                                                                                                                    | Third factor of interest                                                                                                                                                                                                                                                                                                                                                              | Methodology                                                         | Key findings                                                                                                                                                                                                                                                                                                                                                                                                                                                                                               |
|------------------------------------|---------------------------------------------------------------------------------------------------------|----------------------------------------------------------------------------------------------------------------------------------------------------------------------------------------------------------------------------------------------------------------|------------------------------------------------------------------------------------------------------------------------------|---------------------------------------------------------------------------------------------------------------------------------------------------------------------------------------------------------------|-----------------------------------------------------------------------------------------------------------------------------------------------------------------------------------------------------------------------|------------------------------------------------------------------------------------------------------------------------------------------------------------------------------------------------------------------------------------------|---------------------------------------------------------------------------------------------------------------------------------------------------------------------------------------------------------------------------------------------------------------------------------------------------------------------------------------------------------------------------------------|---------------------------------------------------------------------|------------------------------------------------------------------------------------------------------------------------------------------------------------------------------------------------------------------------------------------------------------------------------------------------------------------------------------------------------------------------------------------------------------------------------------------------------------------------------------------------------------|
| Haager & Vaughn, 1995[34]          | Parent, teacher, peer, and self-reports of the social competence of students with learning disabilities | The social competence (social skills, behaviour problems, peer relations, self-perceptions) of children with learning difficulties was compared to that of children without learning difficulties but those who were achieving at low and high academic levels | Three groups of elementary school aged children (Learning difficulties group; low achieving group; and high achieving group) | group was not specified<br>Learning difficulties had been diagnosed in accordance with DSM-3 criteria (APA, 1987). The number with reading difficulties was not described                                     | USA. Participants were recruited from three elementary schools in a large metropolitan school district in south-eastern United States. Children in the LD group spent 50% of their time in mainstream school settings | Teachers and parents reported on internalising and externalising symptoms among children with the behaviour problems with the relevant versions of the Social Skills Rating Scale (teacher and parent versions) (Gresham & Elliot, 1990) | <b>Individual-level:</b> Teachers, parents and children rated children's social skills with the relevant versions of the SSRS. <b>Community-level:</b> The researchers also gauged children's social experiences by asking children to nominate three classmates they liked the most and three they liked the least - this gave an indication of peer liking/popularity of each child | Cross-sectional. MANOVAs were used to analyse the data              | Overall, students who were high achieving academically had fewer social and behavioural difficulties. Students with learning disabilities were rated as having more internalising symptoms (parent report), fewer social skills and more behavioural problems (teacher report) and were less liked by peers than high achieving students. However, students with learning difficulties did not appear to experience the same level of peer rejection as low achieving students without learning disability |
| Heiervang et al. (2001)[35]        | Behavioural problems in children with dyslexia                                                          | To investigate the association between dyslexia and behaviour problems (internalising/externalising) among children with and without dyslexia                                                                                                                  | A population sample of 10–12-year-old (4th grade) children, 25 with dyslexia and 25 without any known learning difficulty    | The dyslexia group was determined by the researchers based on performance on tests of spelling, single word reading, and phonological decoding strategies and exclusion criteria consistent with DSM criteria | Bergen, Norway. Children were recruited through primary schools                                                                                                                                                       | Parents, teachers and children completed the relevant versions of the Child Behaviour Checklist (CBCL; Achenbach, 1991) in order to assess both internalising and externalising symptoms                                                 | <b>Individual-level:</b> The factor of interest to this review is the children's pre-school spoken language ability. This was assessed by parent reported language difficulties requiring speech and language therapy and not by a diagnosis or the use of standardised tests                                                                                                         | Cross-sectional. Data analysed with Kolmogorov-Sminov 2-sample test | Children with dyslexia had significantly more internalising symptoms according to parents and teachers; significantly more externalising problems according to parents; but no significant group differences were reported according to children themselves. Parents reported more pre-school language problems among the children with dyslexia                                                                                                                                                           |
| Heying (1987) [36] Doctoral thesis | Social competence in reading disabled boys with and                                                     | To compare boys with ADHD with and without co-                                                                                                                                                                                                                 | The sample consisted of three groups of children (aged 7-12                                                                  | The groups were defined through the research process                                                                                                                                                          | The ADHD/LD group were recruited through specialist                                                                                                                                                                   | Children's behavioural problems (internalising/externalising) were measured by mother's report with the relevant sub-scales                                                                                                              | <b>Community-level:</b> Children's social competence was measured by the                                                                                                                                                                                                                                                                                                              | Cross-sectional. ANOVA used to analyse data                         | Boys with co-morbid ADHD/RD experienced significantly more social and behavioural difficulties than boys                                                                                                                                                                                                                                                                                                                                                                                                   |

| Author (Date)                     | Title                                                                                                                                                                      | Aim of study                                                                                                                                    | Population                                                                                                                                                                                     | Learning/Reading Difficulties                                                                                                 | Context                                                                                               | Mental Health Concept                                                                                         | Third factor of interest                                                                                                                                                                     | Methodology                                                                          | Key findings                                                                                                                                                                                                                                                                                                                                                                                                                                                                                                                                |
|-----------------------------------|----------------------------------------------------------------------------------------------------------------------------------------------------------------------------|-------------------------------------------------------------------------------------------------------------------------------------------------|------------------------------------------------------------------------------------------------------------------------------------------------------------------------------------------------|-------------------------------------------------------------------------------------------------------------------------------|-------------------------------------------------------------------------------------------------------|---------------------------------------------------------------------------------------------------------------|----------------------------------------------------------------------------------------------------------------------------------------------------------------------------------------------|--------------------------------------------------------------------------------------|---------------------------------------------------------------------------------------------------------------------------------------------------------------------------------------------------------------------------------------------------------------------------------------------------------------------------------------------------------------------------------------------------------------------------------------------------------------------------------------------------------------------------------------------|
|                                   | without attention deficit disorder                                                                                                                                         | morbidity on measures of social competence and behavioural difficulties                                                                         | years, all male); boys with reading disability without ADHD (n = 16); those with co-morbid RD/ADHD (n= 21); and those with no known learning or attentional difficulty (control group, n = 20) | based on standardised measures of reading and attentional difficulties                                                        | support services of the school and the control group from one catholic school. San Diego, USA         | Child Behaviour Checklist (CBCL) and The Conners Parent Rating Scale - Revised (CPRS-R; Goyette, et al. 1978) | social competence scale of the CBCL. This generates three scores: Activities (e.g., participation in hobbies and jobs), Social (peer relationships), and School (e.g., academic performance) |                                                                                      | with reading difficulties without co-morbid ADHD or boys with neither attentional or reading difficulties. No major group differences in social competence and behaviour were reported between the latter two groups. According to mothers', boys with ADHD/LD had less contact with friends and out of school organisations and poorer school performance. The findings, according to the researcher, suggest that that attentional, rather than reading difficulties, account for social and behavioural difficulties among some children |
| Hirsh (2014) [37] Doctoral thesis | Emotional responses to the reading difficulties experienced by young children enrolled in Title I: A qualitative study of students', teachers', and families' perspectives | To explore the reading-related dispositions, emotions, and experiences of young struggling readers from parent, teacher, and child perspectives | The sample consisted of 23 second and third grade children (and their parents and teachers) classified as poor readers by their school and receiving remediation                               | The children had been classified as struggling readers by their school and were in a pull-out program for reading remediation | USA. The research was conducted in a public elementary school in a suburb of Pittsburgh, Pennsylvania | In exploring emotional responses to learning/reading the researcher investigated children's anxiety           | <b>Individual-level:</b> Children's shame and embarrassment<br><b>Community-level:</b> the influence of peer relationships on children's wellbeing                                           | Qualitative design informed by grounded theory                                       | Findings suggest that children who struggle to read often experience emotional distress, anxiety, and try to avoid reading-related tasks. Further, that a reason for the anxiety and avoidance could be fear of teasing and/or embarrassment/concerns about what their peers think of them. The researcher suggested that teachers may misinterpret children's avoidance of reading-related tasks as a negative attitude/low motivation towards reading rather than considering these social considerations                                 |
| Horbach et al. (2020)[38]         | Development of behavior problems in children with and without Specific                                                                                                     | To investigate the role of ADHD as a mechanism linking childhood SLD with                                                                       | The sample consisted of 292 children (at time-point 1; kindergarten, 166 boys, and                                                                                                             | Children were classified with SLD in grade 5 if they performed below the 16th                                                 | Germany. The sample derived from a longitudinal study which tracked mono-lingual                      | Parents reported on children's internalising/externalising symptoms with the Child Behaviour Checklist (CBCL) | <b>Community-level:</b> Parent's also reported on children's social problems with the social problems                                                                                        | Longitudinal design. Growth component models were used to assess change in behaviour | Children with SLD (without ADHD) in contrast to those with ADHD, appeared to have stable behaviour over time according to parents. Children with ADHD (with and without                                                                                                                                                                                                                                                                                                                                                                     |



| Author (Date)              | Title                                                                                                                   | Aim of study                                                                                                                                                        | Population                                                                                           | Learning/Reading Difficulties                                                                                                                         | Context                                                                                                                                                 | Mental Health Concept                                                                                                                                                                                                                                                                                                              | Third factor of interest                                                                                                                                                                                                                                                                  | Methodology                                                                                                                                                | Key findings                                                                                                                                                                                                                                                                                                                                                                                           |
|----------------------------|-------------------------------------------------------------------------------------------------------------------------|---------------------------------------------------------------------------------------------------------------------------------------------------------------------|------------------------------------------------------------------------------------------------------|-------------------------------------------------------------------------------------------------------------------------------------------------------|---------------------------------------------------------------------------------------------------------------------------------------------------------|------------------------------------------------------------------------------------------------------------------------------------------------------------------------------------------------------------------------------------------------------------------------------------------------------------------------------------|-------------------------------------------------------------------------------------------------------------------------------------------------------------------------------------------------------------------------------------------------------------------------------------------|------------------------------------------------------------------------------------------------------------------------------------------------------------|--------------------------------------------------------------------------------------------------------------------------------------------------------------------------------------------------------------------------------------------------------------------------------------------------------------------------------------------------------------------------------------------------------|
|                            | Learning Disorders in reading and spelling from kindergarten to fifth grade                                             | emotional and behavioural problems                                                                                                                                  | 126 girls) tracked to year 5, the first year of secondary school                                     | percentile ranking in at least one domain (spelling or reading). 33% of the sample with SLD had comorbid ADHD compared to 3% in the group without SLD | German school-children from kindergarten to fifth grade on development and other factors                                                                |                                                                                                                                                                                                                                                                                                                                    | sub-scale of the CBCL                                                                                                                                                                                                                                                                     | problems (internalising, externalising, attentional difficulties, social difficulties) over time                                                           | SLD), in contrast, developed more internalising/externalising behaviour over time and appeared to be especially vulnerable during times of transition such as school entrance. Regarding social difficulties, children with SLD seem to be particularly vulnerable when they first started school, and emotional/attentional difficulties peaked for these children in the last year of primary school |
| Hossain et al. (2021) [39] | The association between anxiety and academic performance in children with reading disorder: A longitudinal cohort study | To examine the association between overall academic performance and anxiety among children with reading disorder                                                    | One hundred and twenty-eight children and adolescents (aged 7-14 years) with reading disorder        | All participants were required to have a RD to be enrolled in the schools and the study                                                               | USA. Participants were recruited from 3 schools which specialise in teaching students with reading disorder                                             | Children's anxiety was initially measured with the School Anxiety Scale -Teacher Report (SAS-TR; Lyneham et al., 2008) but at later time-points was measured by the 8-item version of Spence's Children's Anxiety Scale (Teacher and parent versions) (SCAS; Reardon et al., 2018)                                                 | <b>Individual-level:</b> academic performance was the outcome variable in this study and was measured by teacher ratings of academic progress by survey items of the researchers own design                                                                                               | A 2-year longitudinal cohort study. Tracked children for three years                                                                                       | Children's anxiety symptoms were significantly negatively associated with their academic performance both cross-sectionally and longitudinally. Anxiety was significantly associated with reduced academic performance over time                                                                                                                                                                       |
| Hossain et al. (2022) [40] | The role of grit and resilience in children with reading disorder: A longitudinal cohort study                          | To investigate whether grit and resilience were associated with academic performance, anxiety, depression, and quality of life among children with reading disorder | One hundred and sixty-three children and adolescents with reading disorder (6-16 years) participated | All participants were required to have a RD to be enrolled in the schools and the study                                                               | Participants were recruited from 3 schools in the San Francisco area of the USA. The schools specialised in working with students with reading disorder | Anxiety, as above. Depression – measured by the Short Mood and Feelings Questionnaire (SMFQ) and children's Quality of Life was measured by parent report with the Paediatric Quality of Life Inventory 4.0 (Varni et al., 2001). This scale assesses QOL across four domains: physical, emotional, social, and school functioning | <b>Individual-level:</b> aspects of children's coping ability, namely, grit and resilience were measured by teacher and parent report with the Grit and Resilience Scale designed by the researchers for this study's purposes. Academic performance was also an outcome variable and was | Three-year longitudinal cohort study. Repeated measures analysis using linear mixed-effects models were used to investigate associations between variables | After adjusting for age and sex, higher levels of grit and resilience were significantly related to improved mental health, academic performance, and Quality of Life among students with reading disorder                                                                                                                                                                                             |

| Author (Date)                      | Title                                                                                                        | Aim of study                                                                                                                                                                       | Population                                                                                                                                                                                      | Learning/Reading Difficulties                                                                                                                              | Context                                                                           | Mental Health Concept                                                                                                                                                                                                                                   | Third factor of interest                                                                                                                                                                                   | Methodology                                                                                                                                                                                                                               | Key findings                                                                                                                                                                                                                                                                                                                                                                     |
|------------------------------------|--------------------------------------------------------------------------------------------------------------|------------------------------------------------------------------------------------------------------------------------------------------------------------------------------------|-------------------------------------------------------------------------------------------------------------------------------------------------------------------------------------------------|------------------------------------------------------------------------------------------------------------------------------------------------------------|-----------------------------------------------------------------------------------|---------------------------------------------------------------------------------------------------------------------------------------------------------------------------------------------------------------------------------------------------------|------------------------------------------------------------------------------------------------------------------------------------------------------------------------------------------------------------|-------------------------------------------------------------------------------------------------------------------------------------------------------------------------------------------------------------------------------------------|----------------------------------------------------------------------------------------------------------------------------------------------------------------------------------------------------------------------------------------------------------------------------------------------------------------------------------------------------------------------------------|
|                                    |                                                                                                              |                                                                                                                                                                                    |                                                                                                                                                                                                 |                                                                                                                                                            |                                                                                   |                                                                                                                                                                                                                                                         | measured by teacher ratings.                                                                                                                                                                               |                                                                                                                                                                                                                                           |                                                                                                                                                                                                                                                                                                                                                                                  |
| Hughes & Dawson (1995)[41]         | Memories of school: Adult dyslexics recall their school days                                                 | To explore schooling experiences from the retrospective perspective of adults with dyslexia                                                                                        | Forty-seven adults (30 males and 17 females, age range 19-51 years, Mage = 31 years) 45% were in employment, 36% were unemployed and 19% were full-time students                                | All participants were attending the Winchester Dyslexia Institute for at least one term                                                                    | USA                                                                               | The emotional experience of schooling is explored. The survey contained questions which gauged perspectives on both internalising (e.g., "I was withdrawn and shy") and externalising (e.g., "Teachers generally thought I was badly behaved") symptoms | <b>Individual-level:</b> self-esteem, shame, academic performance and the effect of being labelled "lazy". <b>Community-level:</b> Teachers' misunderstandings/misconceptions, peer problems and bullying  | Mixed methods. A survey which contained both open and closed questions. Responses were analysed both quantitatively and qualitatively                                                                                                     | The findings of this study suggested to the researcher that a cycle of poor academic performance, and being misunderstood and/or bullied by others, contributes to emotional distress amongst students with dyslexia                                                                                                                                                             |
| Ihbour et al. (2021)[42]           | Mental health among students with neurodevelopmental disorders: Case of dyslexic children and adolescents    | To assess self-esteem, anxiety and depression and co-morbid psychiatric conditions among Arabic speaking children and adolescents with dyslexia relative to those without dyslexia | A sample of 205 children and adolescents attending mainstream schools; 56 with dyslexia (41 boys and 15 girls Mage = 12.1 years and 149 good readers (63 boys and 86 girls, Mage = 11.71 years) | Children in the dyslexia group had been previously identified as having dyslexia. This was validated through a timed word-reading test and teacher reports | The schoolchildren were recruited from the Beni Mellal-Khenifra region of Morocco | Children/adolescents self-reported on their level of depression symptoms with the Beck-Depression Inventory (BDI; Beck et al., 1996) and their level of anxiety symptoms with Taylors Inventory of Manifest Anxiety (Taylor, 1953)                      | <b>Individual-level:</b> Children reported on four domains of self-esteem: general, family, social and school, with the school version of the Coopersmith Self-Esteem Inventory (SEI; Coopersmith, 1984)   | Cross-sectional design. Children with and without dyslexia were compared on the psycho-social variables. This was followed by a correlational analysis of three variables (self-esteem, depression and anxiety) in each of the two groups | Children, and adolescents with dyslexia, regardless of gender, reported significantly higher levels of depression, anxiety, and poorer overall self-esteem (across all four domains). Furthermore, the researcher found significant associations between poor global self-esteem and anxiety and poor social self-esteem and depression among children/adolescents with dyslexia |
| Ilardi (2010) [43] Doctoral thesis | Maternal mentalization and child psychosocial adaptation for children with learning and behavioral disorders | To investigate whether mothers ability to mentalise her child's internal experience (referred to as mother's reflective capacity) is associated with their child's                 | The sample consisted of 18 mother/child dyads. The children were all diagnosed with or regarded as at risk for Attention-Deficit/Hyperactivity Disorder, a                                      | Reading difficulties were determined based on children's word-reading and reading comprehension performance on sub-tests of the Wechsler Individual        | USA. The children were recruited as part of a larger longitudinal study           | Children's psycho-social functioning was the outcome variable and was measured by parent-report using the Child Behaviour Checklist (CBCL; Achenbach, 1991) and the Social Skills Rating System (SSRS; Gresham & Elliot, 1990)                          | <b>Family-level:</b> Mother's mentalisation capacity was measured through a structured interview (the PDI-2R). It is a concept that reflects the ability of mothers to reflect on their own feeling states | Mixed methods design. Mothers were interviewed about family dynamics and attitudes to their child's learning difficulties and completed standardised measures                                                                             | Improved maternal mentalization was associated with higher levels of parent-reported social skills among children in this sample but was not significantly associated with children's internalising/externalising symptoms                                                                                                                                                       |

| Author (Date)        | Title                                                                                                                             | Aim of study                                                                                                                                                                                                           | Population                                                                                                                                                      | Learning/Reading Difficulties                                                                                                         | Context                                                | Mental Health Concept                                                                                                                                                               | Third factor of interest                                                                                                                                                                                | Methodology                                                                                                                                                       | Key findings                                                                                                                                                                                                                                                                                                                                                                                                                                                        |
|----------------------|-----------------------------------------------------------------------------------------------------------------------------------|------------------------------------------------------------------------------------------------------------------------------------------------------------------------------------------------------------------------|-----------------------------------------------------------------------------------------------------------------------------------------------------------------|---------------------------------------------------------------------------------------------------------------------------------------|--------------------------------------------------------|-------------------------------------------------------------------------------------------------------------------------------------------------------------------------------------|---------------------------------------------------------------------------------------------------------------------------------------------------------------------------------------------------------|-------------------------------------------------------------------------------------------------------------------------------------------------------------------|---------------------------------------------------------------------------------------------------------------------------------------------------------------------------------------------------------------------------------------------------------------------------------------------------------------------------------------------------------------------------------------------------------------------------------------------------------------------|
|                      |                                                                                                                                   | psycho-social wellbeing                                                                                                                                                                                                | Reading Disorder, or a Language Impairment and were between age 7-10 years                                                                                      | Achievement Test – 2nd Edition (WIAT-II)                                                                                              |                                                        |                                                                                                                                                                                     |                                                                                                                                                                                                         | of child behaviour                                                                                                                                                |                                                                                                                                                                                                                                                                                                                                                                                                                                                                     |
| Ingesson (2007) [44] | Growing up with dyslexia: Interviews with teenagers and young adults                                                              | To explore how "young people with dyslexia experience school in terms of wellbeing, educational achievement, self-esteem, peer relations and belief in their future" (p. 574, Ingesson, 2007)                          | 75 adolescents and young adults (48 males, age range 14-25 years, Mage = 19 years)                                                                              | All had a formal diagnosis of dyslexia adhering to DSM-4 (APA, 1995) and ICD-10 (WHO, 1992) criteria using an IQ discrepancy approach | Sweden                                                 | Measured by one interview question: "How do/did you feel in school on the whole, in terms of wellbeing?" possible answers were on a 5-point Likert scale from very bad to very good | <b>Individual/Community-level:</b> self-esteem, focusing on strengths, having more educational choice, early diagnosis, and bullying victimisation                                                      | Mixed method approach. Responses from semi-structured interviews were categorised and assigned numerical values which were then analysed via Spearman correlation | The findings of this study suggested to the researcher that the first 6 years of schooling were most difficult for many children with dyslexia. Improved self-esteem and wellbeing among secondary school students may result from students having greater choice in school subjects and being able to compartmentalise their difficulties. Early diagnosis and focusing on strengths were constructed by the researcher as being protective of students' wellbeing |
| Iyanda (2021)[45]    | Bullying victimization of children with mental, emotional, and developmental or behavioural (MEDB) disorders in the United States | To investigate the association between bullying victimisation and health outcomes (including anxiety and depression) among children with a range of mental, emotional, developmental, and behavioural (MEDB) disorders | 23,494 children and adolescents via a large population-based sample (Mage = 11.65 years, 5-17 years) including a group classified as having a learning disorder | Determined by parent response to a survey item querying their child's MEDB status                                                     | The data was collected across 50 states within the USA | The presence of anxiety or depression was determined by parent response to survey items                                                                                             | <b>Community-level:</b> bullying victimisation determined by one item on the parent survey related to their perception of their child having been bullied over the last 12 months - response format Y/N | Cross-sectional. Multivariate logistic models were used to conduct the analysis                                                                                   | Prevalence of bullying victimisation in the learning difficulties group (aged 6-17 years) was 11.9%. It was highest amongst adolescents with learning difficulties (14.2%) relative to younger children with learning difficulties (9.7%). Furthermore, bullying victimisation was positively associated with anxiety and depression in the sample of children with MEDB broadly                                                                                    |

| Author (Date)                        | Title                                                                                      | Aim of study                                                                                                                                                                                              | Population                                                                                                                                 | Learning/Reading Difficulties                                                                                                                                                                                                   | Context                                                                                    | Mental Health Concept                                                                                                                            | Third factor of interest                                                                                                                                                                                                      | Methodology                                                                                                                                                                    | Key findings                                                                                                                                                                                                                                                                                                                                                                                                                                                                       |
|--------------------------------------|--------------------------------------------------------------------------------------------|-----------------------------------------------------------------------------------------------------------------------------------------------------------------------------------------------------------|--------------------------------------------------------------------------------------------------------------------------------------------|---------------------------------------------------------------------------------------------------------------------------------------------------------------------------------------------------------------------------------|--------------------------------------------------------------------------------------------|--------------------------------------------------------------------------------------------------------------------------------------------------|-------------------------------------------------------------------------------------------------------------------------------------------------------------------------------------------------------------------------------|--------------------------------------------------------------------------------------------------------------------------------------------------------------------------------|------------------------------------------------------------------------------------------------------------------------------------------------------------------------------------------------------------------------------------------------------------------------------------------------------------------------------------------------------------------------------------------------------------------------------------------------------------------------------------|
| Jordan & Dyer (2017)[46]             | Psychological wellbeing trajectories of individuals with dyslexia aged 3-11 years          | To investigate age of onset and direction of effects of psychosocial difficulties in children with dyslexia in comparison to typically developing children and those with other special educational needs | The researchers used data from the UK Millennium Cohort (n = 7224 from 2003 - 2011) and tracked children from age 3-11 years               | Dyslexia diagnosis was provided by teacher report                                                                                                                                                                               | United Kingdom                                                                             | Measured by teacher and parent report with the Strengths and Difficulties Questionnaire (SDQ; Goodman, 1997)                                     | <b>Individual/Community-level:</b> Pro-sociality and Peer problems measured by teacher and parent report by the relevant sub-scales of the SDQ                                                                                | Longitudinal design. Growth curve modelling controlling for age, race, gender, and family income was used to analyse the psychosocial variables by group                       | Onset of psycho-social difficulties among children with dyslexia appeared to occur when they commenced school suggesting to the researcher that they are secondary consequences of school experiences                                                                                                                                                                                                                                                                              |
| Kempe et al. (2011)[47]              | A longitudinal study of early reading difficulties and subsequent problem behaviors        | To investigate the direction of effects between reading difficulties and a variety of "problem behaviors"                                                                                                 | The sample consisted of 360 children recruited at kindergarten age                                                                         | 25% of the sample were identified as "at risk" for reading difficulties based on kindergarten word-reading scores. The groups (reading difficulty and no reading difficulty) were re-defined based on reading scores at grade 3 | Sweden. Children were recruited from 14 schools. All spoke Swedish as their first language | Internalising/externalising (aggression) symptoms reported by parents with the Child Behaviour Checklist (CBCL; Achenbach, 1991)                 | <b>Community-level:</b> Children's social problems reported by parents using the relevant sub-scale of the CBCL                                                                                                               | Longitudinal design. Children were tracked from kindergarten to grade 3 and data analysed using ANOVA with group as between-subjects factor and time as within-subjects factor | The only consistent finding across time was a positive association between reading difficulties and inattention. In this sample, reading difficulties were not associated with internalising symptoms. However, relative to parents of children without reading difficulties, parents of children with reading difficulties reported that their children experienced more social difficulties which were present even before they started school and which didn't change over time |
| Konstantareas & Homitidis (1989)[48] | Parental perception of learning-disabled children's adjustment problems and related stress | To investigate parental perceptions of child behaviour problems and how this is associated with parental stress                                                                                           | The sample consisted of 56 parents and their children (n = 28), all diagnosed with learning difficulties, 6-16 years, 20 boys and 8 girls) | All children met DSM-3 criteria for learning difficulties and were tested on a battery of tests focusing on language-related skills                                                                                             | Canada                                                                                     | Child internalising/externalising symptoms were assessed by parent report with the Child Behaviour Checklist (CBCL; Achenbach & Edelbrock, 1981) | Of interest to this study, the following <b>family-level factors</b> were measured: parental stress measured by a 5-item scale of the researchers own design; parent's locus of control (measured by the Rotter (1966) scale; | Cross-sectional                                                                                                                                                                | A positive association between child behavior problems and higher levels of parenting stress and lower levels of paternal self-concept was found. Maternal stress was higher among mothers who had an external locus of control.                                                                                                                                                                                                                                                   |

| Author (Date)                     | Title                                                                                                                                          | Aim of study                                                                                                                                                                                       | Population                                                                                                                                                                                                                                        | Learning/Reading Difficulties                                                                                                          | Context                                                                                                                                                                                                                     | Mental Health Concept                                                                                                                                                                                                               | Third factor of interest                                                                                                                                                                                                                                                                                                       | Methodology                                                                                                                                            | Key findings                                                                                                                                                                                                                                                                                                                                                                                                                                                                                                                            |
|-----------------------------------|------------------------------------------------------------------------------------------------------------------------------------------------|----------------------------------------------------------------------------------------------------------------------------------------------------------------------------------------------------|---------------------------------------------------------------------------------------------------------------------------------------------------------------------------------------------------------------------------------------------------|----------------------------------------------------------------------------------------------------------------------------------------|-----------------------------------------------------------------------------------------------------------------------------------------------------------------------------------------------------------------------------|-------------------------------------------------------------------------------------------------------------------------------------------------------------------------------------------------------------------------------------|--------------------------------------------------------------------------------------------------------------------------------------------------------------------------------------------------------------------------------------------------------------------------------------------------------------------------------|--------------------------------------------------------------------------------------------------------------------------------------------------------|-----------------------------------------------------------------------------------------------------------------------------------------------------------------------------------------------------------------------------------------------------------------------------------------------------------------------------------------------------------------------------------------------------------------------------------------------------------------------------------------------------------------------------------------|
|                                   |                                                                                                                                                |                                                                                                                                                                                                    |                                                                                                                                                                                                                                                   |                                                                                                                                        |                                                                                                                                                                                                                             |                                                                                                                                                                                                                                     | and parental self-concept measured by Coopersmith (1967) short-form, were investigated                                                                                                                                                                                                                                         |                                                                                                                                                        |                                                                                                                                                                                                                                                                                                                                                                                                                                                                                                                                         |
| Kopelman-Rubin et al., (2020)[49] | The relationship between emotion regulation, school belonging, and psychosocial difficulties among adolescents with Specific Learning Disorder | To explore the influence of emotion regulation and school belonging on the psychosocial wellbeing of adolescents with a Specific Learning Disorder (SLD)                                           | 249 Hebrew speaking adolescents from 11 public schools all diagnosed with an SLD (Mage = 12.67 years, 146 boys)                                                                                                                                   | SLD diagnosis met DSM-5 criteria (APA, 2013). Sub-type of learning disability was not described                                        | Israel. Participants were recruited from a variety of schools                                                                                                                                                               | Was assessed by child self-report using the Total Difficulties score of the Strengths and Difficulties Questionnaire (SDQ; Goodman, 1997)                                                                                           | <b>Individual-level:</b> Children's emotion regulation, measured by the General Expectancy for Negative Mood Regulation Scale (Catanzara & Mearns, 1990) and <b>Community-level:</b> student's sense of school belonging measured by the Psychological Sense of School Membership Scale (Goodenow, 1993)                       | Cross-sectional data was analysed using Pearson correlations and a mediation model                                                                     | In this study, children's emotion regulation ability was positively correlated with psychosocial wellbeing and this relationship was mediated by their sense of school belonging                                                                                                                                                                                                                                                                                                                                                        |
| La Greca & Stone, (1990)[50]      | LD status and achievement: confounding variables in the study of children's social status, self-esteem, and behavioral functioning             | To examine associations between academic achievement, and social and behavioural difficulties among children with learning difficulties and the influence of gender on interpersonal relationships | 57 children with learning difficulties (38 male) and a comparison group of 490 without learning difficulties (233 male) all school grades 4-6. The comparison group was divided into an academic low and high achieving group. All groups matched | Learning difficulties group was based on meeting IQ-discrepancy diagnostic criteria. Sub-type of learning disability was not described | Participants were selected from four public schools located in working and middle-class neighbourhoods in Florida USA. All children with learning difficulties spent at least 50% of their school day in mainstream classes | Classroom teachers reported on child mental health using the Revised Behaviour Problem Checklist (RBPC; Quay & Peterson, 1987). This study used three of the subscales: Conduct disorder, Anxiety/Withdrawn, and attention problems | <b>Individual-level:</b> child global and social self-perception, measured by the relevant sub-scales of Harter's self-perception profile for children (SPPC; Harter, 1985). <b>Community-level:</b> "Peer liking" measured by a rating scale whereby each child was asked how much they would like to "play" with a classmate | Cross-sectional. The data from the three groups were compared on all the child and teacher ratings using two factor (Group x Sex) analysis of variance | Children with learning difficulties were given significantly lower ratings of peer liking and higher ratings of peer rejection than the other two groups. Children with learning difficulties self-reported lower social acceptance and global self-worth than the other two groups. Teachers rated girls with learning difficulties to be anxious/withdrawn. The researchers concluded that their findings suggest that academic achievement alone could not account for the variation in peer acceptance and behavioural difficulties |

| Author<br>(Date)              | Title                                                                                                 | Aim of study                                                                                                                                                                                                         | Population                                                                                                                             | Learning/Reading Difficulties                                                                                                                           | Context                                                                                           | Mental Health Concept                                                                                                                                                                                                                                                                                                                 | Third factor of interest                                                                                                                                                                                                                                                                                                                                                                                                                                                                                                                                                | Methodology                                                                                                                                                                                                            | Key findings                                                                                                                                                                                                                                                                                                                                                                                                                                                 |
|-------------------------------|-------------------------------------------------------------------------------------------------------|----------------------------------------------------------------------------------------------------------------------------------------------------------------------------------------------------------------------|----------------------------------------------------------------------------------------------------------------------------------------|---------------------------------------------------------------------------------------------------------------------------------------------------------|---------------------------------------------------------------------------------------------------|---------------------------------------------------------------------------------------------------------------------------------------------------------------------------------------------------------------------------------------------------------------------------------------------------------------------------------------|-------------------------------------------------------------------------------------------------------------------------------------------------------------------------------------------------------------------------------------------------------------------------------------------------------------------------------------------------------------------------------------------------------------------------------------------------------------------------------------------------------------------------------------------------------------------------|------------------------------------------------------------------------------------------------------------------------------------------------------------------------------------------------------------------------|--------------------------------------------------------------------------------------------------------------------------------------------------------------------------------------------------------------------------------------------------------------------------------------------------------------------------------------------------------------------------------------------------------------------------------------------------------------|
|                               |                                                                                                       |                                                                                                                                                                                                                      | for age, gender, race                                                                                                                  |                                                                                                                                                         |                                                                                                   |                                                                                                                                                                                                                                                                                                                                       |                                                                                                                                                                                                                                                                                                                                                                                                                                                                                                                                                                         |                                                                                                                                                                                                                        |                                                                                                                                                                                                                                                                                                                                                                                                                                                              |
| Lawrence et al.<br>(2019)[51] | Effects of positive parenting on mental health in adolescents with learning difficulties              | To explore the effect of family (parental mental health, family functioning and parenting practices) and adolescent social and emotional competencies on the mental health of adolescents with learning difficulties | Participants were a population sample of 24,915 14–15-year-old adolescents (41% female, Mage = 14.47 years) and a corresponding parent | A sub-group of 5.9% of the sample were reported by parents as having a diagnosed learning disability. Sub-type of learning disability was not specified | Canada. Secondary data from the National Longitudinal Survey of Children and Youth (NLSCY) Canada | Anxious and depression symptoms (termed "adolescent distress" by the researchers) were assessed by adolescent self-report using the 7-item "behaviour scale" of the NLSCY survey. The NLSCY survey also contained a question whereby parents reported whether their child had a diagnosis of an emotional or psychological difficulty | <b>Individual-level:</b> adolescent's socio-emotional competence was measured by self-report with the Emotional Quotient Inventory-Youth Version (EQ-I; YV). <b>Family-level:</b> parents reported on family factors with survey items from the NLSCY survey (for parents) and adolescents reported on parenting style with the nurturance and monitoring subscales of the Parents and Me Scale (Lempers et al., 1989). Parental depression was measured with the short version of the Centre for Epidemiological Studies Depression Scale (CES-D scale, Radloff, 1977) | Cross-sectional. Data from one time-point of the longitudinal study were analysed. Direct and indirect effects of all variables on the outcome variable "adolescent distress" was calculated using regression analyses | Adolescent emotional socio-competence and positive parenting relationships (having nurturing parents who were aware of their activities/interests; "parental monitoring") was significantly associated with less internalising symptoms among children with learning difficulties. Parent depression had a small but significant association with adolescents' internalising symptoms, but family functioning was not found to have a meaningful association |
| Lawrence (2020)[52]           | Bridging secondary survey data with in-depth case studies to advance understandings of youth learning | To explore psychological and relational issues among young people with learning and mental health issues                                                                                                             | Adolescents. as above                                                                                                                  | as above                                                                                                                                                | Canada. as above                                                                                  | Measure of youth distress (described above)                                                                                                                                                                                                                                                                                           | <b>Individual-level:</b> socio-emotional competence (described above) and also explored through a case study approach<br><b>Family-level:</b> parenting style, child-parent relationship,                                                                                                                                                                                                                                                                                                                                                                               | Mixed methods design. A path analysis was followed by a case study approach                                                                                                                                            | Findings from the quantitative section found that children's socio-emotional skills, parental mental health, and parental "monitoring" (e.g., having parents that were involved and took an interest in their activities) predicted internalising symptoms among adolescents                                                                                                                                                                                 |

| Author (Date)             | Title                                                                                                                                          | Aim of study                                                                                                                                               | Population                                                                                                                                                                                 | Learning/Reading Difficulties                                                                    | Context                                                                                                                                        | Mental Health Concept                                                                                                                                     | Third factor of interest                                                                                                                                                                                                  | Methodology                                                                                                                                                                   | Key findings                                                                                                                                                                                                                                                                                                                                                                                                                                                                    |
|---------------------------|------------------------------------------------------------------------------------------------------------------------------------------------|------------------------------------------------------------------------------------------------------------------------------------------------------------|--------------------------------------------------------------------------------------------------------------------------------------------------------------------------------------------|--------------------------------------------------------------------------------------------------|------------------------------------------------------------------------------------------------------------------------------------------------|-----------------------------------------------------------------------------------------------------------------------------------------------------------|---------------------------------------------------------------------------------------------------------------------------------------------------------------------------------------------------------------------------|-------------------------------------------------------------------------------------------------------------------------------------------------------------------------------|---------------------------------------------------------------------------------------------------------------------------------------------------------------------------------------------------------------------------------------------------------------------------------------------------------------------------------------------------------------------------------------------------------------------------------------------------------------------------------|
|                           | and mental health concerns                                                                                                                     |                                                                                                                                                            |                                                                                                                                                                                            |                                                                                                  |                                                                                                                                                |                                                                                                                                                           | and parental mental health (described above) <b>Community-level factors:</b> such as friendship were explored in the qualitative section of the study                                                                     |                                                                                                                                                                               | with learning difficulties. Family functioning was not found to have a meaningful association. Through case study, findings support the view that parental mental health, focusing on strengths, friendships, and skills such as self-awareness and advocacy were protective. Risk factors for mental health concerns were exhaustion from school difficulties, low confidence, and avoidance                                                                                   |
| Learned (2016)[53]        | "The behavior kids": examining the conflation of youth reading difficulty and behavior problem positioning among school institutional contexts | To explore young people's experience of reading difficulties within different contexts (e.g., across space and time)                                       | Adolescents. The participants were an ethnically diverse group of 8 ninth grade high school students; their teachers (n tests = 8) and a group of peers identified as "proficient readers" | The participants had all received below proficient scores on district-administered reading tests | USA                                                                                                                                            | Behaviour "problems" from teacher and student perspectives were explored                                                                                  | <b>Community-level:</b> Student-teacher relationships, labelling and stigma were explored                                                                                                                                 | An ethnographic qualitative approach. The researcher shadowed eight adolescents (all 14 years old) identified as "struggling readers" and interviewed them and their teachers | The analysis suggested that some teachers/school construct a "struggling reader" identity which conflates "behaviour problems" with struggling reader status; that children's "behaviour" was not a result of reading difficulties per se but rather learning environments that "position" these students as "problems". Teaching practices which focus on student's strengths and employ restorative disciplinary practices were posited to be protective of student wellbeing |
| Leitão et al., (2017)[54] | Exploring the impact of living with dyslexia: The perspectives of children and their parents                                                   | To explore the lived experience of children with dyslexia and their parents and investigate reasons why dyslexia might be associated with elevated risk of | 13 children and adolescents (aged 10-17 years) and 21 parents (19 mothers and 2 fathers) were interviewed                                                                                  | All child participants had a confirmed diagnosis of dyslexia of at least one year duration       | Parents were all members of the Dyslexia SPELD Foundation (DSF) in Western Australia. Child participants were all monolingual English speakers | Mental health was constructed as comprising of both internalising and externalising symptoms and was explored through a semi-structured interview process | <b>Individual-level:</b> self-esteem, the effect of receiving a diagnosis, feelings of difference <b>Family-level:</b> parent academic and emotional support. <b>Community-level:</b> social support, attitudes of others | Qualitative design. A phenomenological approach using Braun and Clarke's (2006) thematic analysis method to analyse the data                                                  | Internalising rather than externalising symptoms were more commonly reported. Feeling different was an over-arching theme and highlighted broader societal challenges around notions of ability and difference. Social support (peers, parents, teachers) and the explanatory power of diagnosis were also identified as possible protective                                                                                                                                    |

| Author (Date)                | Title                                                                                                                                                                 | Aim of study                                                                                                                                                         | Population                                                                                                                                                                                                | Learning/Reading Difficulties                                                                                                                         | Context | Mental Health Concept                                                                                                                                                                                                | Third factor of interest                                                                                                                                                                                                                                                                                                                                                                     | Methodology                                                          | Key findings                                                                                                                                                                                                                                                                                                                                             |
|------------------------------|-----------------------------------------------------------------------------------------------------------------------------------------------------------------------|----------------------------------------------------------------------------------------------------------------------------------------------------------------------|-----------------------------------------------------------------------------------------------------------------------------------------------------------------------------------------------------------|-------------------------------------------------------------------------------------------------------------------------------------------------------|---------|----------------------------------------------------------------------------------------------------------------------------------------------------------------------------------------------------------------------|----------------------------------------------------------------------------------------------------------------------------------------------------------------------------------------------------------------------------------------------------------------------------------------------------------------------------------------------------------------------------------------------|----------------------------------------------------------------------|----------------------------------------------------------------------------------------------------------------------------------------------------------------------------------------------------------------------------------------------------------------------------------------------------------------------------------------------------------|
|                              |                                                                                                                                                                       | internalising and externalising symptoms                                                                                                                             |                                                                                                                                                                                                           |                                                                                                                                                       |         |                                                                                                                                                                                                                      | (teachers, peers), lack of government funding and teacher training, and a strengths-based approach were identified as factors which may contribute to mental health among children with reading difficulties                                                                                                                                                                                 |                                                                      | factors for some children's mental health                                                                                                                                                                                                                                                                                                                |
| Lin et al. (2013)[55]        | Reading, mathematics, and behavioral difficulties inter-relate: Evidence from a cross-lagged panel design and population-based sample of US upper elementary students | To investigate the direction of effects between reading difficulties and behaviour difficulties over time and the influence of co-occurring mathematics difficulties | The researchers used data from the Early Childhood Longitudinal Study, Kindergarten Class of 1989-99 (ECLS-K), a large population-based sample of 9,324 children attending 966 public and private schools | A reading difficulties group was derived based on performance in the tests of word reading and reading comprehension administered at both time-points | USA     | Internalising/externalising symptoms were measured by teacher report by a survey designed for the ECLS study                                                                                                         | <b>Individual-level:</b> Whilst the focus of this study was to investigate the direction of effects between reading and behavioural difficulties and the influence of co-morbidity with mathematics difficulties, for the purpose of this review, we were interested in children's social and academic skills which were measured by teacher report by various sub-scales of the ECLS survey | Longitudinal design. Children were assessed at third and fifth grade | Children with reading difficulties in third grade were significantly more likely, according to teachers, to have continued reading difficulties, poor task management, poor self-control, poor interpersonal skills, and internalising symptoms in fifth grade. However, only poor task management in third grade predicted grade 5 reading difficulties |
| Lindeblad et al., (2016)[56] | Self-concepts and psychological wellbeing assessed by Beck Youth Inventory among pupils with                                                                          | To investigate the self-image and psychological wellbeing of children/adolescents with dyslexia or severe                                                            | 67 children and adolescents (aged 10-16 yrs., boys = 48, girls = 19) with reading difficulties attending compulsory school                                                                                | The students were nominated by their teachers as having reading/writing difficulties. Of the total sample of 67, 21                                   | Sweden  | Symptoms of anxiety and depression were assessed by self-report with Beck's Youth Inventory (BYI; Beck et al., 2001) and compared to the Swedish norm group of 2358 children (9-18 years) provided by the BYI manual | <b>Individual-level:</b> Children's self-image (measured by self-report with the Beck Youth Inventory) and <b>Community-level:</b> attachment/attitude to                                                                                                                                                                                                                                    | Cross-sectional design                                               | The children with reading difficulties in this sample did not report poor self-image or symptoms of depression and/or anxiety relative to Swedish norms. 96% of students reported that they liked school, 89% reported that they felt confident to                                                                                                       |



| Author (Date)                       | Title                                                                                                                                        | Aim of study                                                                                                   | Population                                                                                                                                                                                                                                                                                             | Learning/Reading Difficulties                                                                              | Context        | Mental Health Concept                                                                                                                                                              | Third factor of interest                                                                                                                                                                                                                                                                                                                                                                                              | Methodology                                        | Key findings                                                                                                                                                                                                                                                                               |
|-------------------------------------|----------------------------------------------------------------------------------------------------------------------------------------------|----------------------------------------------------------------------------------------------------------------|--------------------------------------------------------------------------------------------------------------------------------------------------------------------------------------------------------------------------------------------------------------------------------------------------------|------------------------------------------------------------------------------------------------------------|----------------|------------------------------------------------------------------------------------------------------------------------------------------------------------------------------------|-----------------------------------------------------------------------------------------------------------------------------------------------------------------------------------------------------------------------------------------------------------------------------------------------------------------------------------------------------------------------------------------------------------------------|----------------------------------------------------|--------------------------------------------------------------------------------------------------------------------------------------------------------------------------------------------------------------------------------------------------------------------------------------------|
|                                     | reading difficulties                                                                                                                         | reading difficulties                                                                                           |                                                                                                                                                                                                                                                                                                        | participants were reported to have a dyslexia diagnosis                                                    |                |                                                                                                                                                                                    | school addressed through survey items of the authors own design                                                                                                                                                                                                                                                                                                                                                       |                                                    | manage their schoolwork, and 75% reported that they considered reading an easy activity. The researchers speculated that these results may indicate increased teacher understanding about dyslexia and/or pedagogical approaches that suit the needs of children with reading difficulties |
| Lytton (1968)[57]                   | Some psychological and sociological characteristics of "good" and "poor achievers" (boys) in remedial reading groups: Clinical case studies" | To investigate factors that contribute to good achievement in remedial educational settings                    | A group of 12 children classified as "good achievers" (Mage = 8.7 years) and a group of 12 classified as "poor achievers" (Mage = 8.4 years) 8 boys and 4 girls in each group. Students were placed in each group based on their performance on a word recognition reading test and teacher nomination | All children were identified as having a reading disability and were placed in a reading-remediation class | United Kingdom | Teachers and parents reported on children's behaviour and anxiety. A composite score for anxiety for each child was based on these ratings in addition to researcher observations. | <b>Individual-level:</b> Of interest to this review were children's academic performance. Furthermore, parents completed a survey which contained items pertaining to children's developmental history (including speech development), learning/reading habits, and social skills (siblings and friends/schoolmates) and <b>Family-level:</b> family functioning (e.g., harmony in the home, acceptance of the child) | Cross-sectional. Group comparison design           | Of interest to this review, the researcher found that the poor achieving group, relative to the higher achieving group, had higher anxiety, poor speech development in early childhood, and to a lesser extent, poorer family functioning                                                  |
| Mahdavi (2017) [58] Doctoral thesis | The influence of early parent involvement and depression on academic achievement, psychosocial behaviors, and                                | To investigate how early parenting variables (parent depression and involvement in school) influences academic | The study used data from the Early Childhood Longitudinal Study-Kindergarten (ECLS-K); 10,630 children                                                                                                                                                                                                 | The children were identified by their teacher as LD/RD through the ECLS-K survey                           | USA            | Teachers reported on internalising/externalising behaviour with an adapted version of the Social Skills Rating System (SSRS; Gresham & Elliot, 1990)                               | <b>Individual-level:</b> Children self-reported on their motivation for learning, and teachers reported on children's academic and social performance with                                                                                                                                                                                                                                                            | Longitudinal design. Structural equation modelling | Of interest to this review, children with learning difficulties, relative to those without learning difficulties, were significantly more likely to have higher levels of internalising/externalising symptoms (teacher-reported), lower motivation to                                     |

| Author (Date)                          | Title                                                                                                                            | Aim of study                                                                                                                                                                                                                                   | Population                                                                                                                                                                                                                    | Learning/Reading Difficulties                                                                                                                                           | Context                                                                                                         | Mental Health Concept                                                                                                                                                                                                              | Third factor of interest                                                                                                                                                                                                                                                                                                                                                                | Methodology                                                        | Key findings                                                                                                                                                                                                                                                                                                                                        |
|----------------------------------------|----------------------------------------------------------------------------------------------------------------------------------|------------------------------------------------------------------------------------------------------------------------------------------------------------------------------------------------------------------------------------------------|-------------------------------------------------------------------------------------------------------------------------------------------------------------------------------------------------------------------------------|-------------------------------------------------------------------------------------------------------------------------------------------------------------------------|-----------------------------------------------------------------------------------------------------------------|------------------------------------------------------------------------------------------------------------------------------------------------------------------------------------------------------------------------------------|-----------------------------------------------------------------------------------------------------------------------------------------------------------------------------------------------------------------------------------------------------------------------------------------------------------------------------------------------------------------------------------------|--------------------------------------------------------------------|-----------------------------------------------------------------------------------------------------------------------------------------------------------------------------------------------------------------------------------------------------------------------------------------------------------------------------------------------------|
|                                        | motivation in children with learning disabilities across elementary school                                                       | achievement, motivation, and psycho-social development of children (with and without learning difficulties) over time                                                                                                                          | (51% female) tracked from kindergarten to year 5. A total of 410 identified as having a learning difficulty (180 with reading difficulty and 220 with combined reading and math disability)                                   |                                                                                                                                                                         |                                                                                                                 |                                                                                                                                                                                                                                    | items from the ECLS-K survey and the adapted version of the SSRS. <b>Family-level:</b> Parents reported on their depression symptoms and involvement at their child's school through items on the ECLS-K survey                                                                                                                                                                         |                                                                    | learn, and parents who reported depressive symptoms and low involvement at school. Parental depression did not appear to predict children's psychosocial wellbeing. However, findings suggest the importance of parental school involvement for children with and without learning difficulties                                                     |
| Martinez (2002)[59]<br>Doctoral thesis | A comparison of learning disability subtypes in middle school: Self-concept, perceived social support, and emotional functioning | To compare the psycho-social functioning (self-esteem, social support and emotional well-being) of middle school aged students with dyslexia to those considered to be "typically achieving" and those with other types of learning disability | A sample of 120 adolescents: 6th grade (n=33), 7th grade (n=54), and 8th grade (n=33) classified as: having both reading and math disability (LD), reading disability (RD), math disability (MD) and normally achieving (NA). | Learning disability previously assessed using an IQ-achievement discrepancy definition (reading disability based on word reading and reading comprehension performance) | USA. Participants were recruited from 14 public middle schools in two large school districts in Houston, Texas. | Adolescents reported on their psycho-social functioning with the Behaviour Assessment System for Children (BASC; Reynolds & Kamphaus, 1992)                                                                                        | <b>Individual-level:</b> Adolescents reported on their self-esteem/self-perception with the Self-Perception Profile for Learning Disabled Students and the What I Am Like Scale (Renick & Harter, 1988). <b>Family/Community level:</b> adolescents reported on perceived levels of social support with the Social Support Scale for Children or People in My Life scale (Harter, 1985) | Cross-sectional design. Multivariate analysis of group differences | Co-morbidity of learning disabilities (but not reading or mathematics difficulties alone), was associated with more depression, lower intellectual and academic self-worth, and lower levels of perceived parent and friend support (but not teacher, class-mate or general social support) relative to adolescents without any learning difficulty |
| Matteucci et al., (2019) [60]          | Health-related quality of life and psychological wellbeing of children with Specific Learning                                    | To explore health-related quality of life and psychological well-being of children with                                                                                                                                                        | Thirty children and adolescents (8-14 years) with a diagnosis of SLD (single or mixed type) and their                                                                                                                         | Formally diagnosed with SLD according to ICD-10 criteria (WHO, 2018)                                                                                                    | Children and mothers were recruited in 2017 from a learning difficulties assessment and                         | Child mental health was measured by parent report with the Strengths and Difficulties Questionnaire (SDQ; Goodman, 1997; Tobia & Marzochi, 2017); the Test of Anxiety and Depression, parent version (TAD; Newcomer by the Italian | <b>Family-level:</b> Maternal mental health measured by the EQ-5D-5L (Scalone et al., 2015), parenting stress measured by the Italian                                                                                                                                                                                                                                                   | Cross-sectional. Group comparison study                            | Both mothers and children with learning difficulties, compared to those without learning difficulties, reported lower levels of psycho-social wellbeing. Specifically, children with SLD had higher rates of generalised                                                                                                                            |

| Author (Date)                  | Title                                                                                                                             | Aim of study                                                                                                                  | Population                                                                                                                                                                                    | Learning/Reading Difficulties                                                                                                                                                                           | Context                                                            | Mental Health Concept                                                                                                                                                                                                                                                                                         | Third factor of interest                                                                                                                                                                                                                                                            | Methodology                                                                                                                                                                 | Key findings                                                                                                                                                                                                                                                                                                                                                                                                          |
|--------------------------------|-----------------------------------------------------------------------------------------------------------------------------------|-------------------------------------------------------------------------------------------------------------------------------|-----------------------------------------------------------------------------------------------------------------------------------------------------------------------------------------------|---------------------------------------------------------------------------------------------------------------------------------------------------------------------------------------------------------|--------------------------------------------------------------------|---------------------------------------------------------------------------------------------------------------------------------------------------------------------------------------------------------------------------------------------------------------------------------------------------------------|-------------------------------------------------------------------------------------------------------------------------------------------------------------------------------------------------------------------------------------------------------------------------------------|-----------------------------------------------------------------------------------------------------------------------------------------------------------------------------|-----------------------------------------------------------------------------------------------------------------------------------------------------------------------------------------------------------------------------------------------------------------------------------------------------------------------------------------------------------------------------------------------------------------------|
|                                | Disorders and their mothers                                                                                                       | SLD and their mothers                                                                                                         | mothers. Controlled for ADHD or other health conditions (unspecified) but did not specify subtypes of learning difficulty                                                                     |                                                                                                                                                                                                         | support centre in Northern Italy. Italian was their first language | et al., 1995) and both child and parent versions of the Paediatric Quality of Life Inventory generic core scales (PedsQL; Varni et al., 2001) which provides a Psychosocial Health score                                                                                                                      | version of the Parenting Stress Index-Short Form (PSI-SF; Abidin et al., 1990; Guarino et al., 2008) and parenting self-efficacy measured by the Parenting Self-Efficacy Scale (PSE; Wittkowski et al., 2017)                                                                       |                                                                                                                                                                             | anxiety, school anxiety and depression and their mothers were more likely to report symptoms of anxiety and depression. Fifty percent of mothers of children with learning difficulties reported parental distress and 80% reported a "very poor perceived ability in helping their children with school activities" (p. 51; Matteucci et al., 2019)                                                                  |
| Maughan, B. et al. (2003) [61] | Reading problems and depressed mood                                                                                               | To investigate the relationship between persistent/severe reading difficulties and symptoms of depression                     | A community sample of 1416 children (all boys, and aged 7–10 years at the initial assessment) designated as having reading difficulties and their families were assessed at 6-month intervals | Reading difficulties defined as California Achievement Test (CAT) percentile scores at or below 6 at recruitment and continued reading difficulties (percentile scores at or below the 50th percentile) | USA. The sample was taken from the Pittsburgh longitudinal study   | Children reported on their depression symptoms from age 6 with the short version of the Mood and Feelings Questionnaire (MFQ; Angold, 1989) and parents reported on disruptive behaviour disorders among children with the Revised Diagnostic Interview schedule for Children (DISC-P, Costello et al., 1982) | Carer and/or children reported on a range of <b>Family-level factors</b> including: child-parent relationship and parenting practices (e.g., physical punishment); parental stress and coping with items from the Pittsburgh Youth Survey designed for the wider longitudinal study | Longitudinal design. Logistic regression was used to test for group differences on dichotomous variables and ordinary regressions for analysis of continuous reading scores | The researchers found robust links between reading difficulties and depressed mood among younger, not adolescent, students which could not be explained by the various family factors nor co-morbid disruptive behaviours. Rather the researchers suggest that the findings support the view of a direct association between reading difficulties and depressed mood                                                  |
| McArthur et al. (2022) [62]    | Tracking the relations between children's reading and emotional health across time: Evidence from four large longitudinal studies | To investigate mechanisms responsible for the relationship between reading difficulties and emotional health across childhood | Used four longitudinal databases: one from the United Kingdom (n = 7,870), two from the United States (ns = 8,001 and 7,160) and one from Australia (n = 768). The researchers focused their  | All included studies utilised standardised measures of word-reading and other reading difficulties as criteria                                                                                          | Samples derived from English speaking countries                    | All included studies incorporated standardised measures of internalising/externalising symptoms however measures varied across studies                                                                                                                                                                        | In addition to attentional difficulties, modifiable <b>individual-level factors</b> of self-concept and <b>Community-level factors</b> : peer problems/bullying were investigated. Parental mental health was measured in one of the datasets, but the findings were not published  | All included studies were longitudinal by design. The researchers analysed the data using Structural Equation modelling                                                     | The findings support the view that reading difficulties preceded emotional and peer difficulties developmentally across childhood (and not vice versa). Specifically, reading difficulties at approximately age 7 predicted age 9 and/or 11 anxiety, depression, poor reading self-concept, bullying and other peer difficulties. In contrast, findings supported the view that behaviour difficulties (externalising |

| Author (Date)                      | Title                                                                                                      | Aim of study                                                                                                                                                                                                                    | Population                                                                                                                                                                                                 | Learning/Reading Difficulties                                                                                                                                                                                                                                                                                       | Context                                                                                                                                                                                   | Mental Health Concept                                                                                                                                                                                                                                  | Third factor of interest                                                                                                                                                                                                                                                                                                                                                                                                                                                                                                                                                                                                                                                                                   | Methodology      | Key findings                                                                                                                                                                                                                                                                                                                                                                                                                                   |
|------------------------------------|------------------------------------------------------------------------------------------------------------|---------------------------------------------------------------------------------------------------------------------------------------------------------------------------------------------------------------------------------|------------------------------------------------------------------------------------------------------------------------------------------------------------------------------------------------------------|---------------------------------------------------------------------------------------------------------------------------------------------------------------------------------------------------------------------------------------------------------------------------------------------------------------------|-------------------------------------------------------------------------------------------------------------------------------------------------------------------------------------------|--------------------------------------------------------------------------------------------------------------------------------------------------------------------------------------------------------------------------------------------------------|------------------------------------------------------------------------------------------------------------------------------------------------------------------------------------------------------------------------------------------------------------------------------------------------------------------------------------------------------------------------------------------------------------------------------------------------------------------------------------------------------------------------------------------------------------------------------------------------------------------------------------------------------------------------------------------------------------|------------------|------------------------------------------------------------------------------------------------------------------------------------------------------------------------------------------------------------------------------------------------------------------------------------------------------------------------------------------------------------------------------------------------------------------------------------------------|
|                                    |                                                                                                            |                                                                                                                                                                                                                                 | analysis on data from primary school aged children                                                                                                                                                         |                                                                                                                                                                                                                                                                                                                     |                                                                                                                                                                                           |                                                                                                                                                                                                                                                        | in the main section of the article and are therefore not included in this review.                                                                                                                                                                                                                                                                                                                                                                                                                                                                                                                                                                                                                          |                  | behaviour) preceded later reading difficulties                                                                                                                                                                                                                                                                                                                                                                                                 |
| Mercer (2004) [63] Doctoral thesis | Relations of self-efficacy to symptoms of depression and anxiety in adolescents with learning difficulties | To investigate relationships between self-efficacy and symptoms of depression and anxiety amongst adolescents receiving support for special education services; a subset of whom were identified as having reading difficulties | 83 adolescents (13-17 years, 24 female) divided into two subsets, those with reading difficulties (n = 25) and those who met traditional aptitude-achievement discrepancy criteria for learning disability | All diagnosed as having learning disabilities according to Ministry of Education criteria. However, (n = 46) had below average performance (at or above a standard score of 80) on cognitive ability, or did not present with a discrepancy of at least 1.5 SD's between cognitive ability and academic achievement | The children were recruited from 13 public schools in British Columbia, Canada. All were receiving special education support at school. 91.6% spoke English and 95.2% were born in Canada | Symptoms of depression were measured by self-report with the second edition of the Reynolds Adolescent-Depression Scale (RAD5-2; Reynolds, 2002) and anxiety symptoms with the Multi-dimensional Anxiety Scale for Children (MASC; March et al., 1997) | <b>Individual-level:</b> Children reported on their reading self-efficacy, academic self-efficacy, emotional self-efficacy, and social self-efficacy using a measure of the researchers own design.<br><b>Family and Community-level:</b> Children reported on their perceived levels of social support from parents, friends, and teachers using the brief version of the Social Support Questionnaire (SSQ; Sarason, 1987). Children also reported on their experience of life events (and their rating of them as negative, neutral or positive) with an adapted version of the Life Events Questionnaire (LEQ; Newcomb et al., 1981), which provides an indication of children's perception of stress, | Cross-sectional. | Children with word-reading difficulties had lower reading self-efficacy than others. However, emotional, and social self-efficacy, more adverse life experiences and lack of social support, rather than poor academic or reading self-efficacy, predicted symptoms of depression and anxiety. The researcher concluded that in this sample socio-emotional rather than academic factors were more associated with anxiety/depression symptoms |

| Author (Date)                      | Title                                                                              | Aim of study                                                                                                                                 | Population                                                                                                                                                                         | Learning/Reading Difficulties                                                                                                                                                         | Context                                                       | Mental Health Concept                                                                                                                                                            | Third factor of interest                                                                                                                                                                                                                                                                               | Methodology                                                                                                                               | Key findings                                                                                                                                                                                                                                                                                                                                                                                            |
|------------------------------------|------------------------------------------------------------------------------------|----------------------------------------------------------------------------------------------------------------------------------------------|------------------------------------------------------------------------------------------------------------------------------------------------------------------------------------|---------------------------------------------------------------------------------------------------------------------------------------------------------------------------------------|---------------------------------------------------------------|----------------------------------------------------------------------------------------------------------------------------------------------------------------------------------|--------------------------------------------------------------------------------------------------------------------------------------------------------------------------------------------------------------------------------------------------------------------------------------------------------|-------------------------------------------------------------------------------------------------------------------------------------------|---------------------------------------------------------------------------------------------------------------------------------------------------------------------------------------------------------------------------------------------------------------------------------------------------------------------------------------------------------------------------------------------------------|
|                                    |                                                                                    |                                                                                                                                              |                                                                                                                                                                                    |                                                                                                                                                                                       |                                                               |                                                                                                                                                                                  | according to the researchers                                                                                                                                                                                                                                                                           |                                                                                                                                           |                                                                                                                                                                                                                                                                                                                                                                                                         |
| Michaels & Lewandowski (1990) [64] | Psychological adjustment and family functioning of boys with learning difficulties | To investigate associations between learning difficulties, family functioning and behavioural (internalising and externalising) difficulties | The sample consisted of 59 children with learning difficulties and 65 without learning difficulties (all male and aged 6-12 years) and their parents                               | Previously diagnosed based on an IQ-achievement discrepancy by the Committee on Special Education within their school districts. The number with reading disability was not described | USA. Children were recruited from urban and suburban settings | Parents reported on their child's internalising and externalising symptoms with the Child Behaviour Checklist (CBCL; Achenbach & Edelbrock, 1983)                                | <b>Individual-level:</b> Parent's reported on their child's social competence with the social competence sub-scale of the CBCL. <b>Family-level:</b> Parent's also reported on family functioning with the Family Adaptability and Cohesion Evaluation Scale (FACES III; Olson, Portner & Lavee, 1985) | Cross-sectional. Group comparison design and ANOVA to analyse interaction between family functioning and the boys' psychosocial wellbeing | Boys with learning difficulties had higher levels of parent-reported internalising/externalising and total problem behaviour (but not aggression) relative to boys without learning difficulties. Interaction between internalising/externalising symptoms and family functioning was not significant. Nevertheless, poor family functioning in both groups was associated with lower social competence |
| Morgan et al. (2008) [65]          | Are reading and behavior problems risk factors for each other?                     | To investigate the direction of effects between reading and behavioural difficulties over time                                               | The sample included 11,515 children (50% male, average age of 65.6 months at first time-point) participating in the Early Childhood Longitudinal Study-Kinergarten Cohort (ECLS-K) | Reading scores were dichotomised based on worse 10% (reading difficulties group) or top 90% (comparison group) performance on word-reading, vocabulary and comprehension              | USA                                                           | Teachers reported on internalising/externalising behaviour with an adapted version of the Social Skills Rating System (SSRS; Gresham & Elliot, 1990)                             | <b>Individual-level:</b> Children's interpersonal skills, self-control, and study skills (e.g., task engagement) measured by teacher report using the same measure                                                                                                                                     | Longitudinal design. Children were assessed in first grade and then again in third grade                                                  | Children who had reading difficulties in first grade were significantly more likely to display poor self-control, poor task engagement and higher levels of both internalising and externalising behaviours in third grade. There were no significant group differences in teacher-reported inter-personal skills                                                                                       |
| Morgan et al. (2012) [66]          | Do poor readers feel angry, sad, and unpopular?                                    | To investigate whether being poorly skilled in reading contributes to self-reported emotional and social difficulties                        | The sample consisted of 2,751 children participating in the Early Childhood Longitudinal Study-Kinergarten Cohort (ECLS-K)                                                         | Children were identified as poor readers if they scored in the bottom 10% on their grade 3 ECLS-K reading test. This test measured word-reading,                                      | USA                                                           | A NCES-modified version of the Self-Description Questionnaire-I (SDQ-I; Marsh, 1990) was used to gather children's perceptions on their internalising and externalising symptoms | <b>Community-level:</b> The version of the SDQ-I used in this study also contained a sub-scale to measure children's perceptions of peer problems                                                                                                                                                      | Longitudinal. Data was collected when children were in grade 3 and then again in grade 5                                                  | Children who were identified as poor readers in grade 3, relative to typically reading peers, were more likely to report higher levels of internalising (sad); externalising (angry, distractible); and social problems (lonely and unpopular) in grade 5                                                                                                                                               |

| Author (Date)             | Title                                                                                                                                | Aim of study                                                                                                                                                                                                          | Population                                                                                                                                              | Learning/Reading Difficulties                                                                                                                                                                             | Context                                                                                                                                                               | Mental Health Concept                                                                                                                                                                              | Third factor of interest                                                                                                                                                                                                                                                                                                                                                                                                                                                                         | Methodology                                                                                                                                        | Key findings                                                                                                                                                       |
|---------------------------|--------------------------------------------------------------------------------------------------------------------------------------|-----------------------------------------------------------------------------------------------------------------------------------------------------------------------------------------------------------------------|---------------------------------------------------------------------------------------------------------------------------------------------------------|-----------------------------------------------------------------------------------------------------------------------------------------------------------------------------------------------------------|-----------------------------------------------------------------------------------------------------------------------------------------------------------------------|----------------------------------------------------------------------------------------------------------------------------------------------------------------------------------------------------|--------------------------------------------------------------------------------------------------------------------------------------------------------------------------------------------------------------------------------------------------------------------------------------------------------------------------------------------------------------------------------------------------------------------------------------------------------------------------------------------------|----------------------------------------------------------------------------------------------------------------------------------------------------|--------------------------------------------------------------------------------------------------------------------------------------------------------------------|
|                           |                                                                                                                                      |                                                                                                                                                                                                                       |                                                                                                                                                         | receptive vocabulary and reading comprehension                                                                                                                                                            |                                                                                                                                                                       |                                                                                                                                                                                                    |                                                                                                                                                                                                                                                                                                                                                                                                                                                                                                  |                                                                                                                                                    |                                                                                                                                                                    |
| Newbury, et al. 2020)[67] | Cognitive, non-cognitive, and home environment correlates of reading difficulties in primary-grade students with language impairment | To investigate associations between cognitive, noncognitive (behaviour problems, social competence, effortful control), and home environment factors and reading difficulties among children with language impairment | The sample included 165 public school kindergarten receiving intervention for language difficulties                                                     | The researchers determined a group of children with reading difficulties (36% of the sample) based on performance 1-SD below the norm on standardised tests of letter-word identification and word attack | United Kingdom. This study used data from an existing longitudinal study (The STEPS study) exploring children's speech-language therapy experiences in primary school | Children's internalising and externalising behaviour was measured by parent report using the relevant sub-scales of the Social Skills Rating Scale (SSRS; Gresham & Elliot, 1990)                  | <b>Individual-level:</b> children's "effortful control", and their social competence were also reported by parents with the relevant sub-scales of the SSRS. <b>Family-level:</b> "household factors", specifically, the amount of literacy-based activity that occurs in the home (measured with the HLE; Bennet et al., 2002) and family functioning (specifically the levels of "chaos and confusion" in the home) were reported by parents with the CHAOS questionnaire (Dumas et al., 2005) | Cross-sectional. Logistic regression models were used for the analysis                                                                             | The researchers found that more behaviour problems and poorer social competence, but not "household factors", significantly predicted greater reading difficulties |
| Novita. S., (2016) [68]   | Secondary symptoms of dyslexia: A comparison of self-esteem and anxiety profiles of children with and without dyslexia               | To compare anxiety and self-esteem profiles in children with dyslexia and without dyslexia                                                                                                                            | 124 children (aged 8-11 years), 60 with dyslexia (Mage = 9.23 years) and 64 without (Mage = 8.86) matched for IQ, gender, and school grade. The control | Group membership was determined by the presence of a dyslexia diagnosis by qualified psychologists in accordance to DSM-5 (APA, 2013) and/or ICD-10                                                       | Germany. The data was collected from six schools and one clinic for children with special educational need                                                            | Anxiety was measured by child report using the Spence Children's Anxiety Scale (SCAS; Spence, 1998) which has sub-scales measuring 6 different types of anxiety and provides a total anxiety score | <b>Individual-level:</b> Children reported on their self-esteem with the Self-esteem Adolescents (Schauder, 1991). This measure provides a global self-esteem score but also contains sub-                                                                                                                                                                                                                                                                                                       | Cross-sectional data was analysed using ANOVA with the self-esteem and anxiety as the dependent variables and dyslexia as the independent variable | Dyslexia was associated with higher levels of generalised (but not other types) of anxiety and low school (but not other domains) of self-esteem                   |

| Author (Date)              | Title                                                                                                                                           | Aim of study                                                                                                                                                                             | Population                                                                                                                                                                                                                                       | Learning/Reading Difficulties                                                                                                                                                                                                       | Context                                                                                                                                                                                     | Mental Health Concept                                                                                                                                   | Third factor of interest                                                                                                                | Methodology                                                                                           | Key findings                                                                                                                                                                                                                      |
|----------------------------|-------------------------------------------------------------------------------------------------------------------------------------------------|------------------------------------------------------------------------------------------------------------------------------------------------------------------------------------------|--------------------------------------------------------------------------------------------------------------------------------------------------------------------------------------------------------------------------------------------------|-------------------------------------------------------------------------------------------------------------------------------------------------------------------------------------------------------------------------------------|---------------------------------------------------------------------------------------------------------------------------------------------------------------------------------------------|---------------------------------------------------------------------------------------------------------------------------------------------------------|-----------------------------------------------------------------------------------------------------------------------------------------|-------------------------------------------------------------------------------------------------------|-----------------------------------------------------------------------------------------------------------------------------------------------------------------------------------------------------------------------------------|
|                            |                                                                                                                                                 |                                                                                                                                                                                          | group had no history of learning or other specific difficulties and were recruited schools                                                                                                                                                       | (WHO, 2013) criteria                                                                                                                                                                                                                |                                                                                                                                                                                             |                                                                                                                                                         | scales to measure school self-esteem, home self-esteem, and self-esteem during free time                                                |                                                                                                       |                                                                                                                                                                                                                                   |
| Novita et al., (2019) [69] | Children with dyslexia in different cultures: Investigation of anxiety and coping strategies of children with dyslexia in Indonesia and Germany | To investigate anxiety and coping strategies of children with and without dyslexia in two different cultural settings (Indonesia and Germany)                                            | 124 children (8–11 years) approx. 50% with a dyslexia diagnosis, 64 from Indonesia and the rest from Germany                                                                                                                                     | 29 of the Indonesian children and 31 of the German children had a dyslexia diagnosis. The Salzburg Test of Reading and Writing was administered during the research process (STRT; Landerl et al., 1997) to verify group membership | All German children came from 2 schools whereas all of the Indonesian children with-out dyslexia came from one school and those with dyslexia came from several schools in different states | Children reported on their anxiety with the Spence Children's Anxiety Scales (SCAS; Spence, 1994)                                                       | <b>Individual-level:</b> Children reported on their coping strategies with the Children's Coping Questionnaire (CCQ; Dissanayake, 2006) | Cross-sectional. Five ANOVAs by group were conducted                                                  | Children with dyslexia reported higher levels of generalised and separation anxiety but dyslexia had insignificant main effects on coping. Culture but not dyslexia status influenced children's coping strategies in this sample |
| Operto et al., (2021)[70]  | Neuropsychological profile, emotional/behavioral problems, and parental stress in children with neurodevelopmental disorders                    | To investigate emotional-behavioural problems and parental stress among 3 groups of children with neurodevelopmental differences including a group with Specific Learning Disorder (SLD) | 62 children (and their parents) in total; a group diagnosed with Autism Spectrum Disorder – High functioning (n = 19); ADHD (n = 21); and SLD – mixed type (n = 22, 14 males, Mage = 9.77) and a typically developing control group (males = 11, | All children in the SLD group were formally diagnosed by two experienced neuro-psychologists according to DSM-5 criteria (APA, 2013)                                                                                                | The clinical samples were recruited via the Child and Adolescent Neuro-psychiatry Unit at the University Hospital of Salerno (Italy)                                                        | Children's internalising/externalising symptoms were measured by parent report on the Children's Behaviour Checklist (CBCL; Achenbach & Rescorla, 2001) | <b>Family-level:</b> parental stress was measured by the Parenting Stress Index Short-Form (PSI-SF; Abidin, 1995)                       | Cross-sectional. Group differences were assessed using Kruskal-Wallis Ttests and U-Mann Whitney tests | Parental stress and child mental health concerns were higher across all three of the disability groups compared to controls                                                                                                       |

| Author (Date)                     | Title                                                                               | Aim of study                                                                                                                                                                                                   | Population                                                                                                                                                                                                                                                                                                                                   | Learning/Reading Difficulties                                                                                                                                                                                                                                                                             | Context                                                                                        | Mental Health Concept                                                                                                                                                                                                                                                                                                                                              | Third factor of interest                                                                                                                                                                                                                                                                                                                                                                                    | Methodology                                                                                                                                                                                                                             | Key findings                                                                                                                                                                                                                                                                                                                                                                                                                                                                                                                                                                                                                                                                                 |
|-----------------------------------|-------------------------------------------------------------------------------------|----------------------------------------------------------------------------------------------------------------------------------------------------------------------------------------------------------------|----------------------------------------------------------------------------------------------------------------------------------------------------------------------------------------------------------------------------------------------------------------------------------------------------------------------------------------------|-----------------------------------------------------------------------------------------------------------------------------------------------------------------------------------------------------------------------------------------------------------------------------------------------------------|------------------------------------------------------------------------------------------------|--------------------------------------------------------------------------------------------------------------------------------------------------------------------------------------------------------------------------------------------------------------------------------------------------------------------------------------------------------------------|-------------------------------------------------------------------------------------------------------------------------------------------------------------------------------------------------------------------------------------------------------------------------------------------------------------------------------------------------------------------------------------------------------------|-----------------------------------------------------------------------------------------------------------------------------------------------------------------------------------------------------------------------------------------|----------------------------------------------------------------------------------------------------------------------------------------------------------------------------------------------------------------------------------------------------------------------------------------------------------------------------------------------------------------------------------------------------------------------------------------------------------------------------------------------------------------------------------------------------------------------------------------------------------------------------------------------------------------------------------------------|
|                                   |                                                                                     |                                                                                                                                                                                                                | Mage = 10.88 years)                                                                                                                                                                                                                                                                                                                          |                                                                                                                                                                                                                                                                                                           |                                                                                                |                                                                                                                                                                                                                                                                                                                                                                    |                                                                                                                                                                                                                                                                                                                                                                                                             |                                                                                                                                                                                                                                         |                                                                                                                                                                                                                                                                                                                                                                                                                                                                                                                                                                                                                                                                                              |
| Palti (1998) [71] Doctoral thesis | A study of the socio-emotional aspects of educationally resilient dyslexic students | To investigate socio-emotive factors relating to educational resilience among children with dyslexia                                                                                                           | The sample consisted of eighty children (7-11 years, all boys) with dyslexia                                                                                                                                                                                                                                                                 | All the boys in the sample were formally diagnosed with dyslexia following parent/teacher concern and using the ability-achievement definition of dyslexia                                                                                                                                                | United Kingdom                                                                                 | Parents reported on children's social, emotional, and behavioural functioning using a single open-box item on a questionnaire of the researchers own design. The teacher questionnaire had a section where the teacher can tick whether they perceived the child to experience certain internalising (e.g., anxious) or externalising (e.g., aggression) behaviour | <b>Individual-level:</b> Children's educational resilience was measured using standardised tests of literacy skills. Children also reported on their self-esteem by self-report with the BIG Steem Questionnaire (Maines and Robinson, 1988).                                                                                                                                                               | Mixed methods and group comparison study. Boys with dyslexia who performed better academically (referred to as "academically resilient") were compared on socio-emotional variables to those who were performing less well academically | The educationally resilient boys with dyslexia reported higher levels self-esteem but more socio-emotional difficulties compared to those categorised as less educationally resilient. From this, the researcher suggested that boys with dyslexia who are educationally resilient may "pay an emotional cost for their academic success" (p.127)                                                                                                                                                                                                                                                                                                                                            |
| Panicker & Chelliah (2016)[72]    | Resilience and stress in children and adolescents with Specific Learning Disability | To assess the level of stress, resilience, depression and anxiety among two groups of children; those who have Specific Learning Disability (SLD) and those who have Borderline Intellectual Functioning (BIF) | The sample consisted of children and adolescents (age range 7-17 years, Mage = 12.15 years, 92% male); 41 diagnosed as having SLD; and a comparison group of 41 diagnosed as having borderline intellectual functioning (IQ 75-79) intellectual functioning. Psychiatric co-morbidity was present in 41% of the sample with SLD (13% had co- | Diagnosis for SLD was assessed by a qualified clinical psychologist based on performance two standard deviations below their current academic year at school in spite of having normal intellectual functioning. Twenty seven percent of the sample of children/adolescents with SLD had reading disorder | India. Ninety eight percent of the children in the SLD group were attending mainstream schools | Depression, anxiety, and stress were measured by the 42-item self-report Depression, Anxiety and Stress Scale (DASS; Lovibond & Lovibond, 1995)                                                                                                                                                                                                                    | <b>Individual-level:</b> Children's levels of stress (measured by the DASS) and resilience (measured by the Resilience Scale-14 (RS-14; Wagnild, 2009) which measures an individual's capacity to manage life challenges and stressors. <b>Family-level:</b> parent's level of awareness about their child's learning difficulties was measured through an interview schedule of the researchers own design | Mixed methods design                                                                                                                                                                                                                    | 75% of students with SLD had low level of resilience and 51% were "reprimanded" by their parents for not performing well academically even though 91% of parents were aware that their child had an SLD. Parents reported low levels of SLD specific training. However, these parental factors were not associated with children's self-reported levels of resilience, stress, anxiety and depression. In this sample, the SLD group reported higher levels of anxiety relative to the BIF group and children with reading difficulties had statistically significant higher levels of anxiety than those without reading difficulties. Of those with SLD, 14.2% reported severe depression; |



| Author (Date)                   | Title                                                                                                              | Aim of study                                                                                                              | Population                                                                                                                                                      | Learning/Reading Difficulties                                                                                                                                                                                                                                                                    | Context                                                                            | Mental Health Concept                                                                                                                                                            | Third factor of interest                                                                                                                        | Methodology                                       | Key findings                                                                                                                                                                                                                                                                                                                                                                                          |
|---------------------------------|--------------------------------------------------------------------------------------------------------------------|---------------------------------------------------------------------------------------------------------------------------|-----------------------------------------------------------------------------------------------------------------------------------------------------------------|--------------------------------------------------------------------------------------------------------------------------------------------------------------------------------------------------------------------------------------------------------------------------------------------------|------------------------------------------------------------------------------------|----------------------------------------------------------------------------------------------------------------------------------------------------------------------------------|-------------------------------------------------------------------------------------------------------------------------------------------------|---------------------------------------------------|-------------------------------------------------------------------------------------------------------------------------------------------------------------------------------------------------------------------------------------------------------------------------------------------------------------------------------------------------------------------------------------------------------|
|                                 |                                                                                                                    |                                                                                                                           | morbid ADHD; 3% with depression and 2% with anxiety) and 27% with BIF                                                                                           |                                                                                                                                                                                                                                                                                                  |                                                                                    |                                                                                                                                                                                  |                                                                                                                                                 |                                                   | 23.8% of children reported severe anxiety; and 16.6% reported severe stress                                                                                                                                                                                                                                                                                                                           |
| Parhiala et al. (2015)[73]      | Psychosocial functioning of children with and without dyslexia: A follow-up study from ages four to nine           | To investigate the psycho-social functioning of children with dyslexia before and after the transition to primary school. | Tracked the development of 170 children (half at risk of reading difficulties and half not) over the transition from home to school.                            | After grade 2 a dyslexia group (n = 39 children, 20 girls and 19 boys) was formed. They fulfilled diagnostic criteria for dyslexia using standardised tests of word-reading difficulty                                                                                                           | Finland                                                                            | Internalising and externalising symptoms were measured by parent report using the relevant sub-scales of the Behaviour Assessment for Children (BASC; Reynolds & Kamphaus, 1992) | <b>Individual-level:</b> Children's adaptability and social skills were measured by parent report using the relevant sub-scale of the BASC      | Longitudinal design                               | Children with dyslexia, relative to those without dyslexia, were rated by parents as having poorer social skills and attentional difficulties but no link between dyslexia and internalising/externalising symptoms was found in this sample                                                                                                                                                          |
| Pih (1984) [74] Doctoral thesis | A comparison of normal and disabled readers in elementary school on intellectual, self-esteem, and anxiety factors | To investigate associations between reading, cognitive, and non-cognitive (anxiety/self-esteem) factors                   | The sample consisted of 40 children (aged 7-8, grade 2-3) identified as poor readers and 40 typically reading peers matched by age, gender, grade, race, and IQ | The groups were determined by children's scores on a standardised reading test (word reading and comprehension ability). Further testing of various aspects of reading were conducted to ascertain "reading level" which was treated as a correlational variable in the second part of the study | USA. The reading difficulties group were all accessing reading remediation classes | Children's anxiety was measured by self-report with the Revised Children's Manifest Anxiety Scale (RCMAS; Reynolds & Richmond, 1978)                                             | <b>Individual-level:</b> Children's self-esteem was measured by self-report with the Coopersmith Self-Esteem Inventory (SEI; Coopersmith, 1984) | Cross-sectional. ANOVA and correlational analysis | Typical readers, compared to those identified as poor readers, scored significantly higher on self-esteem but no group differences in anxiety were reported. There was a significant positive relationship between self-esteem and reading achievement in the typical reading group and a significant negative relationship between anxiety and reading achievement in the reading difficulties group |

| Author (Date)             | Title                                                                                                                                                                                   | Aim of study                                                                                                                                                                                     | Population                                                                                                                                                                                      | Learning/Reading Difficulties                                                                                                                                                                                              | Context                                                                                                                                                                               | Mental Health Concept                                                                                                                                                                                                                                                                                       | Third factor of interest                                                                                                                                                                                                                                | Methodology                                                                                                                                                      | Key findings                                                                                                                                                                                                                                                                                                                                                     |
|---------------------------|-----------------------------------------------------------------------------------------------------------------------------------------------------------------------------------------|--------------------------------------------------------------------------------------------------------------------------------------------------------------------------------------------------|-------------------------------------------------------------------------------------------------------------------------------------------------------------------------------------------------|----------------------------------------------------------------------------------------------------------------------------------------------------------------------------------------------------------------------------|---------------------------------------------------------------------------------------------------------------------------------------------------------------------------------------|-------------------------------------------------------------------------------------------------------------------------------------------------------------------------------------------------------------------------------------------------------------------------------------------------------------|---------------------------------------------------------------------------------------------------------------------------------------------------------------------------------------------------------------------------------------------------------|------------------------------------------------------------------------------------------------------------------------------------------------------------------|------------------------------------------------------------------------------------------------------------------------------------------------------------------------------------------------------------------------------------------------------------------------------------------------------------------------------------------------------------------|
| Russell et al. (2015)[75] | Behavioural difficulties that co-occur with specific word reading difficulties: A UK population-based cohort study                                                                      | To investigate the relationship between word-reading difficulties at age 7 and a range of social, emotional, and behavioural difficulties at age 11                                              | Utilised the Millennium Cohort Study (MCS) data from 18519 participating families                                                                                                               | 13, 423 children were tested at age 7 for word reading ability with the British Ability Scales (BAS; Elliot et al., 1996). A reading difficulties group was formed based on performance 2 SD below chronological age norms | United Kingdom                                                                                                                                                                        | Measured by teacher and parent report with the Strengths and Difficulties Questionnaire (SDQ; Goodman, 1997)                                                                                                                                                                                                | <b>Individual/Community-level:</b> children's sign. pro-sociality and peer problems both measured by parents and teachers via the relevant subscales of the Strengths and Difficulties Questionnaire (SDQ; Goodman, 1997)                               | Longitudinal design. Tracked children from age 7 until 11 years                                                                                                  | In this sample, word-reading difficulties were associated with (and appeared to precede) elevated levels of emotional difficulties, peer problems, conduct problems and hyperactivity/attentional difficulties measured by teacher and parent report                                                                                                             |
| Sahin et al., (2018)[76]  | The relationship of clinical symptoms with social cognition in children diagnosed with attention deficit hyperactivity disorder, specific learning disorder or autism spectrum disorder | To study Theory of Mind (ToM) among children with Specific Learning Disorder (SLD) in comparison to children with other neurodevelopmental differences and those considered typically developing | The sample consisted of children aged 7-12 years: 24 children diagnosed with Specific Learning Disorder (SLD); 24 with ADHD; 26 with autism; and 24 with no known neurodevelopmental difference | Diagnoses conformed to DSM-5 criteria. Additionally, comorbidities were exclusion criteria for group membership in this study                                                                                              | Turkey. The children with neurodevelopmental differences were recruited from a clinical context and the typically developing controls were all volunteer relatives of health workers. | Internalising/externalising symptoms were measured by parent and teacher report with the Aberrant Behaviour Checklist (ABC) (Aman et al., 1987) and the Turgay DSM-4 Disruptive Behaviour Disorders Rating Scale - Teacher form (Turgay, 1994)                                                              | <b>Individual-level:</b> The variable of interest to this review is children's social skills which were reported on by parents using the Social Responsiveness Scale (SRS) however the researchers also measured children's Theory of Mind (TOM) skills | Cross-sectional design                                                                                                                                           | Children with neurodevelopmental disorders (including those with SLD) had deficits in theory of mind, relative to typically developing controls, independent of language skills and intelligence. Furthermore, the researchers found a significant correlation between poor social cognition skills and poorer social skills, learning, attention, and behaviour |
| Sainio et al. (2019)[77]  | The role of learning difficulties in adolescents' academic emotions and academic achievement                                                                                            | To examine associations between learning difficulties, academic emotions, and academic achievement                                                                                               | The sample consisted of 845 grade 6 children (455 girls, 390 boys)                                                                                                                              | A reading difficulties group was determined by performance 1 standard deviation below the mean of the whole sample on standardised tests of: word                                                                          | The study was part of a broader longitudinal study following a community sample of Finnish students across the transition from                                                        | Children reported on their academic emotions with the Finnish version of the Achievement Emotions Questionnaire (AEQ; Pekrun et al., 2011). The researchers focused on "hope" (e.g., "I have an optimistic view towards studying"), enjoyment (e.g., "I enjoy acquiring new knowledge"), and anxiety (e.g., | <b>Individual-level:</b> Children self-reported on their overall academic achievement; literacy achievement (grade in literacy) and math achievement (grade in mathematics); and                                                                        | Longitudinal. Data from the fall and spring of grade 6 was analysed. Gender, difficulty in other academic areas, and depression were controlled in the analysis. | The results of interest to this review are that students with reading difficulties reported lower hope and anxiety towards reading than those without reading difficulties. Furthermore, student's hope played a mediating role between learning difficulties and academic (mathematics and literacy)                                                            |

| Author (Date)      | Title                                                                                                      | Aim of study                                                                                                                                                                                                                            | Population                                                                                             | Learning/Reading Difficulties                                                                                                                                   | Context                                                                                                                                                                                                                                                              | Mental Health Concept                                                                            | Third factor of interest                                                                                                                                                                                                         | Methodology                                                                                                                                                                                                                                                                         | Key findings                                                                                                                                                                                                                                                                                                                                                                                                                                                                            |
|--------------------|------------------------------------------------------------------------------------------------------------|-----------------------------------------------------------------------------------------------------------------------------------------------------------------------------------------------------------------------------------------|--------------------------------------------------------------------------------------------------------|-----------------------------------------------------------------------------------------------------------------------------------------------------------------|----------------------------------------------------------------------------------------------------------------------------------------------------------------------------------------------------------------------------------------------------------------------|--------------------------------------------------------------------------------------------------|----------------------------------------------------------------------------------------------------------------------------------------------------------------------------------------------------------------------------------|-------------------------------------------------------------------------------------------------------------------------------------------------------------------------------------------------------------------------------------------------------------------------------------|-----------------------------------------------------------------------------------------------------------------------------------------------------------------------------------------------------------------------------------------------------------------------------------------------------------------------------------------------------------------------------------------------------------------------------------------------------------------------------------------|
|                    |                                                                                                            |                                                                                                                                                                                                                                         |                                                                                                        | identification, decoding, and reading fluency                                                                                                                   | primary to secondary school.                                                                                                                                                                                                                                         | "I get tense and nervous while studying")                                                        | attitude to their learning (hope and enjoyment – described under MH concept)                                                                                                                                                     |                                                                                                                                                                                                                                                                                     | achievement. The researchers concluded that subject-specific academic emotions should be considered in regard to the academic achievement of students with learning difficulties                                                                                                                                                                                                                                                                                                        |
| Singer (2005) [78] | The strategies adopted by Dutch children with dyslexia to maintain their self-esteem when teased at school | Through structured interviews with children the researcher aimed to explore their school experiences, specifically experiences of being teased, coping with teasing, and their psychological well-being (self-esteem and mental health) | The sample consisted of 60 Dutch children with dyslexia (aged 9–12 years) in mainstream class settings | All had been formally diagnosed with a primary diagnosis of dyslexia of at least one year duration, with at least average IQ and no other known psychopathology | Netherlands. The children were recruited via educational guidance services providing remedial support to children with learning difficulties. 91% of the sample were reported to be receiving extra remedial help from school and/or out of school service providers | The researcher explored children's psycho-social functioning broadly with a focus on self-esteem | <b>Individual-level:</b> Children's self-esteem, emotion regulation and coping strategies, and <b>Family/Community level:</b> perceptions of social support and peer difficulties/bullying were explored in this study           | Mixed methods design. All children were invited to respond to fictitious scenarios involving the school experiences of children with dyslexia. After this, children were invited to discuss their own experiences, and 85% of the children did this via a semi-structured interview | The findings suggested that many children of this age feel embarrassed about their dyslexia and vulnerable to negative peer (self) comparisons. The author concluded that dyslexia directly affects children's self-esteem and makes them vulnerable to teasing. Further, that withdrawn or disruptive behaviour may be serving a protective function for children (in terms of addressing bullying); and that parents are the most important source of emotional and practical support |
| Singer (2007) [79] | Coping with academic failure, a study of Dutch children with dyslexia                                      | A companion piece to the study above, in this study the researcher aimed to explore how children with dyslexia cope with repeated academic failure and how this relates to their self-esteem and mental health                          | 9–12-year-old children (as above)                                                                      | as above                                                                                                                                                        | Netherlands. as above                                                                                                                                                                                                                                                | The researcher explored children's psycho-social functioning broadly with a focus on self-esteem | <b>Individual-level:</b> Children's self-esteem and coping strategies were explored and <b>Family/Community level:</b> perceptions of social support and peer difficulties/peer comparisons/bullying were explored in this study | Mixed methods design. All children were invited to respond to fictitious scenarios involving the school experiences of children with dyslexia. After this, children were invited to discuss their own experiences, and 56 children did so.                                          | The researcher found that parent support was crucial for children's wellbeing. In contrast, peers were more likely perceived as threats to self-esteem. The protective function of adult role models (generally family members) was explored and the negative influence of bullying. Children were described as being motivated to protect their self-esteem and employed different approaches to do so such as: "1) working hard and committing to standards, 2)                       |

| Author (Date)               | Title                                                                                                                              | Aim of study                                                                                                                                                                    | Population                                                                                                                                                                                                                                                                                                                       | Learning/Reading Difficulties                                                                                                                             | Context                                                                                                                                                                                                      | Mental Health Concept                                                                                                                                                  | Third factor of interest                                                                                                                                                                                                                                                                                                                                                                                                                                                           | Methodology                                                                                                                                       | Key findings                                                                                                                                                                                                                                                                                                                                                                                                                                       |
|-----------------------------|------------------------------------------------------------------------------------------------------------------------------------|---------------------------------------------------------------------------------------------------------------------------------------------------------------------------------|----------------------------------------------------------------------------------------------------------------------------------------------------------------------------------------------------------------------------------------------------------------------------------------------------------------------------------|-----------------------------------------------------------------------------------------------------------------------------------------------------------|--------------------------------------------------------------------------------------------------------------------------------------------------------------------------------------------------------------|------------------------------------------------------------------------------------------------------------------------------------------------------------------------|------------------------------------------------------------------------------------------------------------------------------------------------------------------------------------------------------------------------------------------------------------------------------------------------------------------------------------------------------------------------------------------------------------------------------------------------------------------------------------|---------------------------------------------------------------------------------------------------------------------------------------------------|----------------------------------------------------------------------------------------------------------------------------------------------------------------------------------------------------------------------------------------------------------------------------------------------------------------------------------------------------------------------------------------------------------------------------------------------------|
|                             |                                                                                                                                    |                                                                                                                                                                                 |                                                                                                                                                                                                                                                                                                                                  |                                                                                                                                                           |                                                                                                                                                                                                              |                                                                                                                                                                        |                                                                                                                                                                                                                                                                                                                                                                                                                                                                                    |                                                                                                                                                   | lowering standards 3) seeking support from significant others (i.e. parents and teachers), and, 4) avoiding comparisons with others (i.e. peers)” (p. 314)                                                                                                                                                                                                                                                                                         |
| Smart et al., (2019) [80]   | Social media-tors of relationships between childhood reading difficulties, behaviour problems, and secondary school non-completion | To examine whether key indicators of social connectedness mediate relationships between childhood reading difficulties/behavioural problems and secondary school non-completion | Four groups of children were formed by the researchers for this study: those with reading disorders (n = 38, 37% male); behavioural difficulties (n = 66, 58% male); both reading difficulties and behavioural difficulties (n = 38, 66% male); and neither reading difficulties or behavioural difficulties (n = 125, 35% male) | Children who performed in the lowest 16% on a standardised measure of word-reading were classified as those with reading difficulty                       | Australia. Data was drawn from the Australian Temperament Project an Australian longitudinal study that has followed a community sample of 2,443 children and their families from infancy to young adulthood | Internalising/Externalising symptoms were measured by parent and teacher report with the Rutter Child Behaviour Questionnaire (CBQ; Rutter, 1967; Rutter et al., 1970) | <b>Family/Community-level factors:</b> Children reported on their family and peer attachment with the Inventory of Parent and Peer Attachment (IPPA; Armsden & Greenburg, 1987) and both parents and children reported on various school factors such as: teacher attachment and approach to learning such as school engagement (including attendance, diligence), and school involvement (parent and child) with the ATP- devised School Problems Scale (SPS; Prior et al., 2000) | Longitudinal design. The analysis used data from the 6th (7-8 years), 9th (12-13 years), 10th (13-14 years), and 13th (19-20 years) time-points   | The group with reading difficulties (without behavioural problems) reported more difficulty with understanding their schoolwork in the high school context, relative to children without reading/behavioural difficulties but were similar in terms of other measures. In contrast, children with behavioural problems (with and without co-occurring reading difficulties) reported significantly poorer family and school attachment/involvement |
| Snowling et al., (2007)[81] | Children at family risk of dyslexia: A follow-up in early adolescence                                                              | Using a longitudinal design, the researchers aimed to investigate a range of genetic and environmental risk factors for psycho-social outcomes                                  | Fifty children with a family history of dyslexia and a control group of 20 without a family history of dyslexia were followed from infancy until                                                                                                                                                                                 | At time-point 4 (when the children were aged 12-13 years) 42% of children (11 boys and 10 girls) who had been previously classified as at family risk for | United Kingdom. This study represented the fourth phase of a longitudinal study which tracked British children at risk of literacy                                                                           | Parents reported on children's internalising/externalising symptoms with the Strengths and Difficulties Questionnaire (SDQ; Goodman, 1997)                             | <b>Individual-level:</b> Children reported on their self-perception in three domains (social, academic, and physical competence) using Harter's Self-perception Profile for Children (Harter, 1985)                                                                                                                                                                                                                                                                                | Mixed methods. Three groups (at risk "impaired"; at risk "unimpaired" and control group) were compared on the language, literacy, and SDQ factors | There was a significant positive association between literacy (reading and spelling) difficulties, attentional difficulties, and parental ratings of hyperactivity (but not conduct problems) and emotional difficulties, poor self-ratings of scholastic competence but not overall self-esteem or peer problems. There was also                                                                                                                  |

| Author (Date)       | Title                                                                                                                                                            | Aim of study                                                                                                                                             | Population                                                                                                                                                                                                              | Learning/Reading Difficulties                                                                                                                                                                                                                                                                                                                                                               | Context                                               | Mental Health Concept                                                                                                                                            | Third factor of interest                                                                                                                                                                                                                                                                                                                                                                                                                                                       | Methodology                                                                                                                                                                       | Key findings                                                                                                                                                                                                                                                                              |
|---------------------|------------------------------------------------------------------------------------------------------------------------------------------------------------------|----------------------------------------------------------------------------------------------------------------------------------------------------------|-------------------------------------------------------------------------------------------------------------------------------------------------------------------------------------------------------------------------|---------------------------------------------------------------------------------------------------------------------------------------------------------------------------------------------------------------------------------------------------------------------------------------------------------------------------------------------------------------------------------------------|-------------------------------------------------------|------------------------------------------------------------------------------------------------------------------------------------------------------------------|--------------------------------------------------------------------------------------------------------------------------------------------------------------------------------------------------------------------------------------------------------------------------------------------------------------------------------------------------------------------------------------------------------------------------------------------------------------------------------|-----------------------------------------------------------------------------------------------------------------------------------------------------------------------------------|-------------------------------------------------------------------------------------------------------------------------------------------------------------------------------------------------------------------------------------------------------------------------------------------|
|                     |                                                                                                                                                                  | among children identified in early childhood as being at risk of literacy difficulties                                                                   | early adolescence (time-point 4). This study analysed the time-point 4 data                                                                                                                                             | dyslexia were classified as having literacy difficulties based on reading and spelling attainment 1 standard deviation below the mean of the control group. This group (at risk impaired) were compared on a range of indicators to children who were at family risk for dyslexia but did not develop literacy difficulties (at risk unimpaired) and the original control group of children | difficulties from infancy                             |                                                                                                                                                                  | in addition to their print exposure using a questionnaire that tapped recognition of author names, book titles etc. Children were also assessed for spoken language skills. <b>Family/Community-level:</b> parents reported on children's peer problems with the relevant sub-scale of the SDQ. A parent interview gleaned information relating to a wide range of family (e.g., family stress and family literacy environment) and school (e.g., home-school liaison) factors | (externalising, internalising, peer problems), self-perception (schoolastic, social acceptance and athletic), family environment and educational factors measured at time-point 4 | evidence of a negative association between literacy difficulties and maternal well-being (higher levels of maternal stress and depression), family life, and parental worries about their child's progress at school even though most children were receiving support at school           |
| Sorrenti (2019)[82] | The predicting role of school learned helplessness in internalizing and externalizing problems: An exploratory study in students with Specific Learning Disorder | To investigate learned helplessness as a predictor of the development of internalising/externalising difficulties in children with learning difficulties | The sample consisted of 84 children and adolescents (ranged from first grade to upper secondary school; Mage = 12.9 years, 52 males, 44 with learning difficulties and 40 without learning difficulties). The number of | All children in the learning difficulties group had an SLD diagnosis which conformed to DSM-5 criteria. Further, the researchers administered standardised tests in reading and writing to ensure that the SLD group met                                                                                                                                                                    | All children were attending school in Mes-sini, Italy | Internalising/externalising symptoms were measured by self and parent report with the relevant versions of the Child Behaviour Checklist (CBCL; Achenbach, 1991) | <b>Individual-level:</b> Children reported on their learned helplessness in school using the learned helplessness sub-scale of the Italian version of the Learned Helplessness Questionnaire (LHQ; Sorrenti et al., 2015). In this study learned helplessness referred to student's passiveness and lack                                                                                                                                                                       | Cross-sectional                                                                                                                                                                   | Children with learning difficulties, relative to those without learning difficulties, had higher levels of internalising symptoms. Furthermore, learned helplessness was a predictor of internalising and externalizing symptoms in children with, but not without, learning difficulties |

| Author (Date)                        | Title                                                                                                                  | Aim of study                                                                                                       | Population                                                                                                                                                                                          | Learning/Reading Difficulties                                                                                | Context                                 | Mental Health Concept                                                                            | Third factor of interest                                                                                                                                                                                                                                                                                                            | Methodology                                                                                                                         | Key findings                                                                                                                                                                                                                                                                                                                                                                                                                                                                                                                                                                                            |
|--------------------------------------|------------------------------------------------------------------------------------------------------------------------|--------------------------------------------------------------------------------------------------------------------|-----------------------------------------------------------------------------------------------------------------------------------------------------------------------------------------------------|--------------------------------------------------------------------------------------------------------------|-----------------------------------------|--------------------------------------------------------------------------------------------------|-------------------------------------------------------------------------------------------------------------------------------------------------------------------------------------------------------------------------------------------------------------------------------------------------------------------------------------|-------------------------------------------------------------------------------------------------------------------------------------|---------------------------------------------------------------------------------------------------------------------------------------------------------------------------------------------------------------------------------------------------------------------------------------------------------------------------------------------------------------------------------------------------------------------------------------------------------------------------------------------------------------------------------------------------------------------------------------------------------|
|                                      |                                                                                                                        |                                                                                                                    | children with dyslexia was not described                                                                                                                                                            | diagnostic criteria                                                                                          |                                         |                                                                                                  | of confidence regards academic tasks                                                                                                                                                                                                                                                                                                |                                                                                                                                     |                                                                                                                                                                                                                                                                                                                                                                                                                                                                                                                                                                                                         |
| Speers (2019)[83]<br>Doctoral thesis | An auto/biographical investigation exploring the life-stories of adults with dyslexia                                  | To explore individual's experiences with dyslexia over the lifespan including in education and employment settings | Eight adults with a formal diagnosis of dyslexia including the researcher participated in the study                                                                                                 | All participants self-identified as having dyslexia                                                          | United Kingdom                          | Childhood school behaviour in association with dyslexia were explored                            | <b>Individual-level:</b> Identity issues and the value of early diagnosis, self-esteem, shame (embarrassment), concealment and disclosure were explored by the participants. <b>Family-level:</b> the importance of parental support and understanding. <b>Community-level:</b> supportive learning environments, finding strengths | Qualitative design. Described an autobiographical narrative inquiry. The researcher developed themes from the interview transcripts | Childhood externalising rather than internalising behaviour was highlighted. This behavior appeared to be especially related to the school context and dyslexia-related school difficulties such as being placed in "low" groups for learning and having difficulties with learning (leading to frustration). Early diagnosis and parental (especially maternal) support appeared to be protective of self-esteem. Participants described feeling ashamed of their learning difficulties and various coping strategies such as withdrawing and trying to conceal their differences at school and beyond |
| Stanley et al. (1997)[84]            | Differences in depression and self-esteem reported by learning disabled and behavior disordered middle school students | To investigate self-reported group differences in self-esteem and depression among two at risk groups of students  | Sixty-one middle school students (age and gender not provided but middle school students are typically adolescents) 33 classified as having learning disability and 28 as having behaviour disorder | The students had been classified as having a learning disability. The number with dyslexia was not specified | no context provided, believed to be USA | Depression measured by self-report with the Children's Depression Inventory (CDI; Kovacs, 1992)  | <b>Individual-level:</b> self-esteem measured by children's self-report on the Coopersmith Self-esteem Inventory (CSEI; Coopersmith, 1990)                                                                                                                                                                                          | Cross-sectional                                                                                                                     | The levels of depression between the two groups (learning disabled vs behaviourally disordered) were similar. At the "mildly depressed" level, the researcher felt the levels of depression were higher than what would be expected among children generally. Of interest to this review, the children with learning difficulties reported significantly lower levels of self-esteem than did those classified as having a behaviour disorder                                                                                                                                                           |
| Sukovieff & Kruk (2021) [85]         | Reading difficulty and socio-emotional                                                                                 | To investigate the effect of "age of                                                                               | Forty-five children (ages 9-12 years) with                                                                                                                                                          | Reading difficulties initially determined by                                                                 | Winnepeg, Canada                        | Children reported on their internalising/externalising symptoms with the modified version of the | <b>Individual-level:</b> children's ability to cope with their                                                                                                                                                                                                                                                                      | Cross-sectional. Mediation analysis using the                                                                                       | Early identified children (before grade 1) were more likely to report increased externalising and                                                                                                                                                                                                                                                                                                                                                                                                                                                                                                       |

| Author (Date)              | Title                                                                                                     | Aim of study                                                                                                                                                          | Population                                                                                                                                                                                        | Learning/Reading Difficulties                                                                                                      | Context                                                                                                                                                  | Mental Health Concept                                                                                                                                                                                                                | Third factor of interest                                                                                                                                                                                                                                                                                                                                                                                                                                                                                 | Methodology                                                                                                      | Key findings                                                                                                                                                                                                                                                                                                                                                                                                                                     |
|----------------------------|-----------------------------------------------------------------------------------------------------------|-----------------------------------------------------------------------------------------------------------------------------------------------------------------------|---------------------------------------------------------------------------------------------------------------------------------------------------------------------------------------------------|------------------------------------------------------------------------------------------------------------------------------------|----------------------------------------------------------------------------------------------------------------------------------------------------------|--------------------------------------------------------------------------------------------------------------------------------------------------------------------------------------------------------------------------------------|----------------------------------------------------------------------------------------------------------------------------------------------------------------------------------------------------------------------------------------------------------------------------------------------------------------------------------------------------------------------------------------------------------------------------------------------------------------------------------------------------------|------------------------------------------------------------------------------------------------------------------|--------------------------------------------------------------------------------------------------------------------------------------------------------------------------------------------------------------------------------------------------------------------------------------------------------------------------------------------------------------------------------------------------------------------------------------------------|
|                            | adjustment: Internalizing patterns depend on age of identification                                        | "Identification" on children's coping strategies and internalising/externalising symptoms                                                                             | reading difficulties were recruited from schools and childcare centres                                                                                                                            | teacher/parent nomination and then confirmed through scores on standardised tests of word-reading administered by the researchers  |                                                                                                                                                          | Self-Description Questionnaire (SDQ; Marsh, 1990) used by other studies using the Early Childhood Longitudinal Study; this scale has six items relating to externalising symptoms and eight items relating to internalising symptoms | reading difficulties was measured by self-report using an adaptation of the Response to Stress Questionnaire-School version (RSQ; Connor-Smith et al., 2000) - items were adapted to refer to school/reading related stress. Additionally, the age of identification of the child's reading difficulties was reported by an item on the parent survey and coded dichotomously as early (poor reading identified $\leq 6$ years) and late identified (reading difficulties identified between 7-12 years) | PROCESS macro (Hayes, 2018).                                                                                     | internalising symptoms relative to those classified as being identified later. Furthermore, the way children reported coping with their reading difficulties did not appear to influence the association between age of identification and mental health outcomes                                                                                                                                                                                |
| Terras et al., (2009) [86] | Dyslexia and psycho-social functioning: An exploratory study of the role of self-esteem and understanding | To investigate the nature of the relationship between self-esteem, mental health, and family factors (i.e., understanding dyslexia and the parent-child relationship) | A convenience sample of 68 children and adolescents with dyslexia (age range = 7.67–16.58 years, Mage = 11.2 years, 44 male) and their parents were recruited through a dyslexia service/advocacy | All children had been assessed as having dyslexia by an educational psychologist using the IQ-reading ability discrepancy approach | United Kingdom. All families were members of "Dyslexia Action" in Scotland. High percentage of parents (52%) were in professional/managerial occupations | Children's socio-emotional difficulties were measured by parent report with the Strengths and Difficulties Questionnaire (SDQ; Goodman, 1997). A sub-sample of 35 children completed the child version of the SDQ                    | <b>Individual-level:</b> Children's self-esteem was measured by child and parent report with Harter's Self-profile for Children (SPCC; Harter, 1985) and survey items measured self-understanding of dyslexia. <b>Family-level:</b> Parent understanding of dyslexia and parent/child relationship quality                                                                                                                                                                                               | Mixed methods design. Cross sectional data was analysed by Pearson correlations and compared to population norms | Dyslexia was associated with socio-emotional difficulties. Low self-esteem positively correlated with socio-emotional difficulties in this sample. Further, there was a positive association between poor academic self-esteem and SDQ "emotional difficulties". Children's socio-emotional wellbeing was associated with having more positive attitudes to dyslexia (both parents and children) and more positive peer and parent relationships |

| Author (Date)                        | Title                                                                                | Aim of study                                                                               | Population                                                                                                                                                                                                                          | Learning/Reading Difficulties                                                                                                                                                                                                                   | Context                                                                                         | Mental Health Concept                                                                                                                                                                                                                                                                                                                                                                                                                                                         | Third factor of interest                                                                                                                                                                                                                                                                                                                                                                                                                                                          | Methodology                                                                                  | Key findings                                                                                                                                                                                                                                                                                                                                                                       |
|--------------------------------------|--------------------------------------------------------------------------------------|--------------------------------------------------------------------------------------------|-------------------------------------------------------------------------------------------------------------------------------------------------------------------------------------------------------------------------------------|-------------------------------------------------------------------------------------------------------------------------------------------------------------------------------------------------------------------------------------------------|-------------------------------------------------------------------------------------------------|-------------------------------------------------------------------------------------------------------------------------------------------------------------------------------------------------------------------------------------------------------------------------------------------------------------------------------------------------------------------------------------------------------------------------------------------------------------------------------|-----------------------------------------------------------------------------------------------------------------------------------------------------------------------------------------------------------------------------------------------------------------------------------------------------------------------------------------------------------------------------------------------------------------------------------------------------------------------------------|----------------------------------------------------------------------------------------------|------------------------------------------------------------------------------------------------------------------------------------------------------------------------------------------------------------------------------------------------------------------------------------------------------------------------------------------------------------------------------------|
|                                      |                                                                                      |                                                                                            | group in Scotland                                                                                                                                                                                                                   |                                                                                                                                                                                                                                                 |                                                                                                 |                                                                                                                                                                                                                                                                                                                                                                                                                                                                               | was measured by survey items of the researcher's own design. <b>Community-level:</b> Peer problems were measured by parents using the peer problem sub-scale of the SDQ                                                                                                                                                                                                                                                                                                           |                                                                                              |                                                                                                                                                                                                                                                                                                                                                                                    |
| Thomson et al. (1990)[87]            | Behavior problems in children with the presenting problem of poor school performance | Compared behavioural difficulties among a variety of children with low school performance  | A total sample of 79 children and adolescents (70% males, aged 6-15 years) divided into a learning disabled group; a group with low IQ; a group with borderline IQ; and a control group with normal IQ and no learning difficulties | Thirty-four children met criteria for learning disability based on IQ-discrepancy and performance in the lowest 20% of children on standardised tests of reading, writing or mathematics. The number of children with dyslexia was not reported | USA. All children were experiencing low school performance                                      | Internalising/externalising symptoms were assessed by parent report using a combined checklist based on items from two standardised measures (one being the Child Behaviour Checklist (Achenbach & Edelbrock, 1983) and the other being the Missouri Children's Behaviour Checklist (MCBC; Sines, Pauker, Sines, & Owen, 1969) which contains six subscales which purport to measure aggression, inhibition, activity level, sleep disturbance, somatization, and sociability | <b>Individual-level:</b> Children reported on their self-esteem using Harter's Perceived Competency Scale for Children (Harter, 1982) which includes subscales that relate to cognitive, social and physical self-worth. Parents reported on children's sociability with the MCBC. <b>Family-level:</b> family functioning was measured by parent-report with the Family Relationship Index (FRI; Holahan & Moos, 1981) a measure of family cohesion, expressiveness and conflict | Cross-sectional. ANOVA and MANOVA were used to analyse the data                              | The MCBC sociability factor did not relate to internalising/externalising symptoms in this study. Nevertheless, across subgroups, more behavioural difficulties were associated with lower self-worth and family functioning described as being more controlling and less supportive. Further, internalising symptoms were negatively related to lower levels of social self-worth |
| Tistan (1993)[88]<br>Doctoral thesis | Learning disabilities and depression in children: The development of self-concept    | To investigate the association between learning disabilities, depression, self-esteem, and | The sample consisted of 90, 8-11 year old children (60 with learning difficulties and 30                                                                                                                                            | The children with learning difficulties were recruited from special education classes within                                                                                                                                                    | Described by the researcher as a middle-class suburban community with minimal ethnic diversity. | Children's symptoms of depression were measured by self-report with the Children's Depression Inventory (Kovacs, 1983)                                                                                                                                                                                                                                                                                                                                                        | <b>Individual-level:</b> children's self-concept was measured by self-report with the Piers-Harris Self-Concept Scale (Harris, 1969) and their                                                                                                                                                                                                                                                                                                                                    | Cross-sectional. Described by the researcher as a quasi-experimental group comparison design | Children with learning difficulties, compared to those without learning difficulties, reported more depression in this study. Furthermore, poor self-concept and poor reading comprehension were associated with more                                                                                                                                                              |



| Author (Date)           | Title                                                                                                          | Aim of study                                                                                                                                                                | Population                                                                                                                                                                                    | Learning/Reading Difficulties                                                                                                                                    | Context                                                                                                                | Mental Health Concept                                                                                                                                                                                                                                                                                                                                                            | Third factor of interest                                                                                                                                                                                                                                                                                                             | Methodology                                                                                                                                                                                                                                          | Key findings                                                                                                                                                                                                                                                                                                                                                                                                                             |
|-------------------------|----------------------------------------------------------------------------------------------------------------|-----------------------------------------------------------------------------------------------------------------------------------------------------------------------------|-----------------------------------------------------------------------------------------------------------------------------------------------------------------------------------------------|------------------------------------------------------------------------------------------------------------------------------------------------------------------|------------------------------------------------------------------------------------------------------------------------|----------------------------------------------------------------------------------------------------------------------------------------------------------------------------------------------------------------------------------------------------------------------------------------------------------------------------------------------------------------------------------|--------------------------------------------------------------------------------------------------------------------------------------------------------------------------------------------------------------------------------------------------------------------------------------------------------------------------------------|------------------------------------------------------------------------------------------------------------------------------------------------------------------------------------------------------------------------------------------------------|------------------------------------------------------------------------------------------------------------------------------------------------------------------------------------------------------------------------------------------------------------------------------------------------------------------------------------------------------------------------------------------------------------------------------------------|
|                         | and achievement                                                                                                | school achievement                                                                                                                                                          | without learning difficulties)                                                                                                                                                                | mainstream school settings and had learning difficulties confirmed through psycho-educational assessment                                                         | New Jersey, USA                                                                                                        |                                                                                                                                                                                                                                                                                                                                                                                  | reading achievement (as a measure of school achievement) was measured by the Woodcock Reading Mastery Tests – Revised (Woodcock, 1987)                                                                                                                                                                                               |                                                                                                                                                                                                                                                      | depression among children with learning difficulties. The researcher suggested that the findings support a view that that learning difficulties in combination with depression may be associated with poor self-concept rather than learning disabilities alone                                                                                                                                                                          |
| Törő et al., (2018)[89] | Reading disability spectrum: Early and late recognition, sub-threshold, and full comorbidity                   | To investigate the comorbidity of reading difficulties with sub-threshold and full psychiatric disorders and the influence of age of reading difficulties this relationship | 130 children and adolescents (7-18 years) those with reading difficulties (n = 48, Mage = 10.23 years, 40% girls) and those without reading difficulties (n = 82, Mage=9.66 years, 39% girls) | A Hungarian adaptation of the Dyslexia Differential diagnosis Maas-tricht-Hungarian Standard Test (3DM-H; Toth et al., 2014) was used to verify group membership | Children were recruited through the Department of Children and Family Services, Vecses City Local Government, Hungary. | The Mini International Neuropsychiatric Interview Kid, a diagnostic interview which assesses for 25 child psychiatric disorders related to the DSM-IV, Fourth edition (APA, 1994) was used. This produces a total externalising and total internalising score per participant. Children < 13 years were interviewed with a parent and children ≥ 13 years were interviewed alone | <b>Individual-level:</b> Age of recognition of reading difficulties were investigated in association with the severity of reading difficulties and mental health concerns                                                                                                                                                            | Cross-sectional data                                                                                                                                                                                                                                 | Higher levels of internalising and externalising disorders were more prevalent in the group with, relative to those without, reading difficulties, regardless of reading difficulty severity. When considering both sub-threshold and full psychiatric diagnoses together, externalising symptoms and mood disorders were more prevalent among children whose reading difficulties were recognized late, rather than early in their life |
| Tsovili (2004)[90]      | The relationship between language teachers' attitudes and the state-trait anxiety of adolescents with dyslexia | To investigate anxiety among adolescents with dyslexia and the role of teacher attitudes                                                                                    | 68 adolescents with dyslexia (52 male; Mage = 15 years) and their language teachers (31 males) selected at random from a hospital outpatient service and a specialist dyslexia centre         | All child participants had been previously diagnosed with dyslexia by a multidisciplinary team within a hospital setting                                         | Greater Athens area, Greece                                                                                            | The adolescent's state-trait anxiety was measured by a Greek adaptation of the State-Trait Anxiety Inventory for Children (Psychountaki, 1995; Spielberger et al., 1973). The state anxiety component of the measure was adapted by the researchers to measure reading-related anxiety                                                                                           | <b>Individual-level:</b> through interviews the researcher explored students' attitudes to learning and ways of coping with difficulties.<br><b>Community-level:</b> Teachers completed a questionnaire of the researchers own making (called the Teacher Questionnaire) which purported to measure student-teacher relationship and | Mixed methods design. Group differences on variables of interest were first computed followed by correlational and regression analysis. The adolescents with the lowest and highest levels of reading anxiety (5% of research group at both ends = 9 | Adolescents with dyslexia reported higher reading anxiety but lower levels of trait anxiety than those without reading difficulties. During the interviews, problem-focused coping styles and teacher understanding were identified as protective whereas "learned helplessness" was described as contributing to risk for reading anxiety                                                                                               |

| Author<br>(Date)             | Title                                                                                                                                                     | Aim of study                                                                                                                         | Population                                                                                                                                             | Learning/Reading Difficulties                                                                                                                                                                                         | Context | Mental Health Concept                                                                                                                                                | Third factor of interest                                                                                                                                                                                                                                                                                                                                                                                                                        | Methodology                                                                                                                                                                 | Key findings                                                                                                                                                                                                                                                                                                                                                                        |
|------------------------------|-----------------------------------------------------------------------------------------------------------------------------------------------------------|--------------------------------------------------------------------------------------------------------------------------------------|--------------------------------------------------------------------------------------------------------------------------------------------------------|-----------------------------------------------------------------------------------------------------------------------------------------------------------------------------------------------------------------------|---------|----------------------------------------------------------------------------------------------------------------------------------------------------------------------|-------------------------------------------------------------------------------------------------------------------------------------------------------------------------------------------------------------------------------------------------------------------------------------------------------------------------------------------------------------------------------------------------------------------------------------------------|-----------------------------------------------------------------------------------------------------------------------------------------------------------------------------|-------------------------------------------------------------------------------------------------------------------------------------------------------------------------------------------------------------------------------------------------------------------------------------------------------------------------------------------------------------------------------------|
|                              |                                                                                                                                                           |                                                                                                                                      |                                                                                                                                                        |                                                                                                                                                                                                                       |         |                                                                                                                                                                      | teaching style/behaviour/attitude                                                                                                                                                                                                                                                                                                                                                                                                               | participants) were then interviewed                                                                                                                                         |                                                                                                                                                                                                                                                                                                                                                                                     |
| Turunen et al.<br>(2019)[91] | Word reading skills and externalizing and internalizing problems from grade 1 to grade 2 - Developmental trajectories and bullying involvement in grade 3 | To investigate associations between word-reading skills and internalizing/externalizing behaviour, on bullying involvement over time | A sample of 480 Finnish children (Mage = 7 years 2 months at start of study) were tracked from kindergarten to year 3                                  | Groups of below average and skilled readers were formed based on performance on word-reading tests administered at all time-points during the study                                                                   | Finland | Externalising and internalising symptoms were evaluated by teachers at all three time-points using the Strengths and Difficulties Questionnaire (SDQ; Goodman, 1997) | <b>Community-level:</b> Grade 3 children reported on their bullying involvement (with sub-scales measuring: bullies/victims/ and bully-victims) with the Olweus Bully/Victim Questionnaire (Olweus, 1996).                                                                                                                                                                                                                                      | Longitudinal design                                                                                                                                                         | The researchers concluded that the findings suggest that reading difficulties alone do not increase the risk of bullying involvement but add cumulative risk, alongside internalising/externalising symptoms, to children being bullying perpetrators or bully-victims                                                                                                              |
| Undheim et al.<br>(2008)[92] | Psychosocial factors and reading difficulties: Students with reading difficulties drawn from a representative population sample                           | To investigate a variety of psychosocial variables in a community-based sample of adolescents with and without reading difficulties. | A sample of 2,464 Norwegian adolescents (12-15 years, 50.8% girls) participated. The sample contained a sub-sample with reading difficulties (n = 199) | Determined by two self-report items: "Have you had specific reading and writing problems (dyslexia) in the last 12 months?" and "are the amount of reading problems "large problems" "some problems" or "no problems" | Norway  | Depression was measured by self-report with the Mood and Feelings Questionnaire (MFQ; Angold, 1989)                                                                  | <b>Individual-level:</b> Children reported on their self-esteem with the Self-Perception Profile for Adolescents (SPPA; Harter, 1988, Wichstrom, 1995); their levels of school stress with the Early Adolescent Stress Questionnaire (EASQ; Sund et al., 2003) <b>Family and Community-level:</b> Children reported on their attachment to parents and peers with the Inventory of Parent and Peer Attachment (IPPA; Armsden & Greenberg, 1987) | Cross-sectional. A series of regressions was conducted to examine differences between the two groups (with and without reading difficulties) on the psycho-social variables | Adolescents with reading difficulties, compared to those without reading difficulties, reported lower attachment to parents (but not peers), lower global self-worth as well as higher rates of depression, school stress, and worry about going to school. Adolescents' self-esteem did not moderate the association between school stress and reading difficulties in this sample |

| Author (Date)                         | Title                                                                                                                                                             | Aim of study                                                                                                                                       | Population                                                                                                                                                                                                | Learning/Reading Difficulties                                                                                                                               | Context                                                                                              | Mental Health Concept                                                                                                                                                                                                                                                                                                                                                                                                            | Third factor of interest                                                                                                                                                                                                                                                                    | Methodology                                                                                    | Key findings                                                                                                                                                                                                                                                               |
|---------------------------------------|-------------------------------------------------------------------------------------------------------------------------------------------------------------------|----------------------------------------------------------------------------------------------------------------------------------------------------|-----------------------------------------------------------------------------------------------------------------------------------------------------------------------------------------------------------|-------------------------------------------------------------------------------------------------------------------------------------------------------------|------------------------------------------------------------------------------------------------------|----------------------------------------------------------------------------------------------------------------------------------------------------------------------------------------------------------------------------------------------------------------------------------------------------------------------------------------------------------------------------------------------------------------------------------|---------------------------------------------------------------------------------------------------------------------------------------------------------------------------------------------------------------------------------------------------------------------------------------------|------------------------------------------------------------------------------------------------|----------------------------------------------------------------------------------------------------------------------------------------------------------------------------------------------------------------------------------------------------------------------------|
| Undheim et al. (2011)[93]             | Emotional and behavioral problems among school adolescents with and without reading difficulties as measured by the Youth Self-Report: A one-year follow up study | To investigate the association between reading difficulties and emotional/behavioral difficulties across time                                      | A sample of 191 Norwegian adolescents, 12-15 years, 7.8% with reading difficulties                                                                                                                        | Based on adolescent's self-report of reading difficulties at Time-point 1                                                                                   | Norway                                                                                               | Internalising/externalising symptoms measured by self-report with the Norwegian version of the Youth Self Report - Child Behaviour Checklist (YSR-CBCL; Achenbach, 1991)                                                                                                                                                                                                                                                         | <b>Community-level:</b> Adolescent's social difficulties/experiences was measured by self-report with the 8-item social problems sub-scale of the YSR-CBCL                                                                                                                                  | Longitudinal design.                                                                           | Reading difficulties were associated with higher self-reported internalising symptoms, externalising symptoms, and social difficulties. Furthermore, reading difficulties predicted high levels of social difficulties prospectively irrespective of educational placement |
| Valenti (1986)[94]<br>Doctoral thesis | Manifest aggression, state/trait anxiety, locus of control, perceived parental attention, and reading level among learning disabled adolescent males              | To investigate family and personality factors in association with anxiety and aggression among adolescent males with reading/learning difficulties | 49 adolescents (aged 12-18 years, all male)                                                                                                                                                               | All had met an IQ-discrepancy diagnostic criteria for learning disability. Reading level was also assessed by the researcher by a standardised reading test | Boston, USA. The boys were recruited from specialist schools for children with learning difficulties | Aggression (externalising) and State/Trait anxiety (internalising) were measured by child self-report with the Manifest Aggression Scale (Jesness, 1966) and The State-Trait Manifest Anxiety Scale (version not described)                                                                                                                                                                                                      | <b>Individual-level:</b> Children reported on their locus of control with the Locus of Control Scale (LOC; Nowicki-Strickland, 1973). <b>Family-level:</b> child-parent relationship from the perspective of the child was also assessed                                                    | Cross-sectional. Stepwise multiple regression with manifest aggression as the outcome variable | Higher levels of state and trait anxiety were associated with manifest aggression and less internally focused locus of control. An association between children's aggression and poor child-father relationship was also reported                                          |
| Willcutt et al. (2007)[95]            | Longitudinal study of reading disability and attention-deficit/hyperactivity disorder: Implications for education                                                 | To investigate the long term academic and psycho-social outcomes of children with reading difficulties (RD) (with and without ADHD)                | A sample of children (and their parents) with RD only (n= 71), co-morbid RD/ADHD (n= 51) and ADHD only (n=66) or neither disorder (n=118) Age at initial testing approx. 10-11 years and at the five-year | RD determined by the researchers based on scores on standardised tests of word reading                                                                      | USA. The children were recruited from an existing 5-year longitudinal twin study                     | The researchers developed a separate anxiety, depression and externalising symptoms composite score per child based on clinical interview (parents) and scores on standardised self-report measures such as the Children's Depression Inventory (Kovacs, 1988); the Youth Self-report of the Child Behaviour Checklist (CBCL; Achenbach & Rescorla, 2001); and the Children's Manifest Anxiety Scale; Reynolds & Richmond, 1978) | <b>Individual-level:</b> academic performance, measured by a composite score combining grade point averages and CBCL parent and self-ratings. <b>Community-level:</b> parents and children reported on their social functioning/social difficulties with survey items and the CBCL and YSR- | Longitudinal design. Regression analysis                                                       | Reading difficulties were associated with more academic difficulties, depression and adolescent-onset conduct disorder. Co-morbidity of reading difficulties with ADHD increased risk for academic difficulties and social difficulties                                    |

| Author (Date)              | Title                                                                                                                                              | Aim of study                                                                                 | Population                                                                                                                                                                                                                                                      | Learning/Reading Difficulties                                                                                                                                                                                                                 | Context                                                                        | Mental Health Concept                                                                                                                                                                                                                                                                                                                                                                                      | Third factor of interest                                                                                                                                                                                                                                                                                                                                                                                                                                                                                                                                                                    | Methodology                              | Key findings                                                                                                                                                                                                                                                                                                                          |
|----------------------------|----------------------------------------------------------------------------------------------------------------------------------------------------|----------------------------------------------------------------------------------------------|-----------------------------------------------------------------------------------------------------------------------------------------------------------------------------------------------------------------------------------------------------------------|-----------------------------------------------------------------------------------------------------------------------------------------------------------------------------------------------------------------------------------------------|--------------------------------------------------------------------------------|------------------------------------------------------------------------------------------------------------------------------------------------------------------------------------------------------------------------------------------------------------------------------------------------------------------------------------------------------------------------------------------------------------|---------------------------------------------------------------------------------------------------------------------------------------------------------------------------------------------------------------------------------------------------------------------------------------------------------------------------------------------------------------------------------------------------------------------------------------------------------------------------------------------------------------------------------------------------------------------------------------------|------------------------------------------|---------------------------------------------------------------------------------------------------------------------------------------------------------------------------------------------------------------------------------------------------------------------------------------------------------------------------------------|
|                            |                                                                                                                                                    |                                                                                              | follow-up approximately 15–16.3 years                                                                                                                                                                                                                           |                                                                                                                                                                                                                                               |                                                                                |                                                                                                                                                                                                                                                                                                                                                                                                            | CBCL social problems sub-scale. The survey also contained items to measure children's involvement in extra-curricular activities as an indicator of social engagement                                                                                                                                                                                                                                                                                                                                                                                                                       |                                          |                                                                                                                                                                                                                                                                                                                                       |
| Willcutt et al. (2013)[96] | Co-morbidity between reading disability and math disability: Concurrent psychopathology, functional impairment, and neuropsychological functioning | To better understand the aetiology of the co-morbidity of mathematics and reading disability | The sample consisted of children and adolescents aged 8–15 years: a group with reading disability (RD group n = 241); Mathematics disability (MD group, n = 183); co-morbid RD and MD (n = 188) and a control group with no known learning disability (n = 411) | RD was defined by a cut-off score 1.25 standard deviations below the estimated population mean (approximately 10th percentile) on an age-adjusted measure of word reading ability derived from the Peabody Individual Achievement Test (PIAT) | USA. The participants were recruited from an existing longitudinal twin study. | Symptoms of internalising/externalising disorders were measured by parent report with the Diagnostic Interview for Children and Adolescents (Reich, Wellner & Herjanic, 1997) and by parent and teacher report with the relevant versions of the Child Behaviour Checklist (CBCL; Achenbach & Rescorla, 1991); and the Disruptive Behaviour Rating Scale (DBRS; Barkley et al., 1992); and & Murphy, 1998) | <b>Individual-level:</b> The child survey measured children's perceptions of their academic achievement. Parents reported on their child's global functioning with the Child Global Assessment Scale (Setterberg et al., 1992); and parents and teachers reported on children's academic functioning with the relevant section of the DBRS. <b>Community-level:</b> Children were asked about the extent to which they liked school and children's social problems were reported on by parents and teachers with the CBCL social problems sub-scale; a rating of peer-liking from teacher's | Cross-sectional. Group comparison design | Higher levels of externalising symptoms appeared to be explained by ADHD in this sample, whereas reading difficulties were associated with higher levels of internalising symptoms (depression and generalized anxiety). Co-morbidity appeared to increase risk for social isolation, peer difficulties and poor academic functioning |

| Author (Date)               | Title                                                                                                                                        | Aim of study                                                                                                                                       | Population                                                                                                                                                               | Learning/Reading Difficulties                                                           | Context                                                                                                                       | Mental Health Concept                                                                                                                                                                                                                                  | Third factor of interest                                                                                                                                                                                                                                                                                                     | Methodology                                                                                                                                                                            | Key findings                                                                                                                                                                                                                                                                                                                                                           |
|-----------------------------|----------------------------------------------------------------------------------------------------------------------------------------------|----------------------------------------------------------------------------------------------------------------------------------------------------|--------------------------------------------------------------------------------------------------------------------------------------------------------------------------|-----------------------------------------------------------------------------------------|-------------------------------------------------------------------------------------------------------------------------------|--------------------------------------------------------------------------------------------------------------------------------------------------------------------------------------------------------------------------------------------------------|------------------------------------------------------------------------------------------------------------------------------------------------------------------------------------------------------------------------------------------------------------------------------------------------------------------------------|----------------------------------------------------------------------------------------------------------------------------------------------------------------------------------------|------------------------------------------------------------------------------------------------------------------------------------------------------------------------------------------------------------------------------------------------------------------------------------------------------------------------------------------------------------------------|
|                             |                                                                                                                                              |                                                                                                                                                    |                                                                                                                                                                          |                                                                                         |                                                                                                                               |                                                                                                                                                                                                                                                        | perspectives; and the Social Isolation scale from the Colorado Learning Difficulties Questionnaire (CLCQ; Willcutt et al., 2011)                                                                                                                                                                                             |                                                                                                                                                                                        |                                                                                                                                                                                                                                                                                                                                                                        |
| Zach et al. (2016)[97]      | Academic achievements, behavioral problems, and loneliness as predictors of social skills among students with and without learning disorders | To investigate whether academic achievement, learning difficulties, behaviour problems, and loneliness explain variance in students' social skills | Participants were 733 children and adolescents (6-13 years, 359 boys and 374 girls, 91 with learning difficulties (46 boys, 45 girls), 642 without learning difficulties | All in the LD group had a previous diagnosis based on DSM-4 criteria, was not described | Israel. Children were all in mainstream school settings                                                                       | Children's "behaviour problems" were assessed by teacher report with the problem behaviour sub-scale of the Social Skills Rating System (SSRS; Gresham & Elliot, 1990). This sub-scale measures internalising/externalising symptoms and hyperactivity | <b>Individual-level:</b> Teachers reported on children's social skills and academic competence with the relevant sub-scales of the SSRT. <b>Community-level:</b> Children self-reported on their loneliness with Asher and Wheeler's adapted version of their 24-item self-report measure (Asher, Hymel, and Renshaw, 1984). | Cross-sectional. Regression analysis                                                                                                                                                   | LD status did not explain variance in social skills, but academic achievement and behaviour problems did. Loneliness explained social skills variance amongst boys only. This finding suggests an association between social skills and internalising/externalising symptoms                                                                                           |
| Zuppardo et al., (2021)[98] | More than words: Anxiety, self-esteem and behavioral problems in children and adolescents with dyslexia                                      | To define clinical psycho-affective and behavioural profiles of dyslexia                                                                           | Children and adolescents (aged 8-18 years) participated including those with dyslexia and a control group without any known learning difficulty                          | Children and adolescents in the dyslexia group met DSM-5 diagnostic criteria            | Italy. All participants were native Italian speakers and recruited with the assistance of a Pediatric Neuropsychiatry service | Children's anxiety was measured by self-report with the Multi-dimensional Anxiety Scale for Children (MASC; March et al., 1997) and by parent report with the Child Behaviour Checklist (CBCL; Achenbach, 1991)                                        | <b>Individual-level:</b> children's self-esteem was measured by self-report with Bracken's Multi-dimensional Self-esteem Assessment Test (TMA; Bracken, 1993)                                                                                                                                                                | Cross-sectional. A MANCOVA was conducted to compare the groups on the psychosocial variables. A separate analysis looked at group differences related to age (children vs adolescents) | Children and adolescents with dyslexia had lower levels of self-esteem in academic and social situations, higher levels of anxiety and more behavioural problems than their peers without learning difficulties. Compared to adolescents with dyslexia, children with dyslexia appeared to experience more social anxiety, separation anxiety and behavioural problems |

## References

1. Abarrate, M. Behavior problems and social competence in attention deficit hyperactivity disorder children with and without a learning disorder. Ph.D., United States International University, Ann Arbor, 1993.
2. Aitken, M.; Martinussen, R.; Childs, R.; Tannock, R. Profiles of co-occurring difficulties identified through school-based screening. *Journal of Attention Disorders* **2020**, *24*, 1355-1365, doi:[10.1177/1087054716684377](https://doi.org/10.1177/1087054716684377).
3. Alexander-Passe, N. How dyslexic teenagers cope: An investigation of self-esteem, coping and depression. *Dyslexia: An International Journal of Research and Practice* **2006**, *12*, 256-275, doi:<http://dx.doi.org/10.1002/dys.318>.
4. Al-Yagon, M. Comorbid LD and ADHD in childhood: Socioemotional and behavioural adjustment and parents' positive and negative affect. *European Journal of Special Needs Education* **2009**, *24*, 371-391, doi:<http://dx.doi.org/10.1080/08856250903223054>.
5. Al-Yagon, M. Child-mother and child-father attachment security: Links to internalizing adjustment among children with learning disabilities. *Child Psychiatry & Human Development* **2014**, *45*, 119-131, doi:10.1007/s10578-013-0383-9.
6. Al-Yagon, M. Perceived close relationships with parents, teachers, and peers: Predictors of social, emotional, and behavioral features in adolescents with LD or comorbid LD and ADHD. *Journal of Learning Disabilities* **2016**, *49*, 597-615, doi:10.1177/0022219415620569.
7. Antshel, K.M.; Guy-Ronald, J. Maternal stress in Nonverbal Learning Disorder: A comparison with Reading Disorder. *Journal of Learning Disabilities* **2006**, *39*, 194-205, doi:<http://dx.doi.org/10.1177/00222194060390030101>.
8. Baumeister, A.L.; Storch, E.A.; Geffken, G.R. Peer victimization in children with learning disabilities. *Child & Adolescent Social Work Journal* **2008**, *25*, 11-23.
9. Benassi, E.; Camia, M.; Giovagnoli, S.; Scorza, M. Impaired school well-being in children with Specific Learning Disorder and its relationship to psychopathological symptoms. *European Journal of Special Needs Education* **2020**, doi:10.1080/08856257.2020.1842975.
10. Blicher, S.; Feingold, L.; Shany, M. The role of trait anxiety and preoccupation with reading disabilities of children and their mothers in predicting children's reading comprehension. *Journal of Learning Disabilities* **2017**, *50*, 309-321, doi:<http://dx.doi.org/10.1177/0022219415624101>.
11. Boetsch, E.A.; Green, P.A.; Pennington, B.F. Psychosocial correlates of dyslexia across the life span. *Development and Psychopathology* **1996**, *8*, 539-562, doi:<http://dx.doi.org/10.1017/S0954579400007264>.
12. Bonifacci, P.; Storti, M.; Tobia, V.; Suardi, A. Specific Learning Disorders: A look inside children's and parents' psychological well-being and relationships. *Journal of Learning Disabilities* **2016**, *49*, 532-545, doi:<https://dx.doi.org/10.1177/0022219414566681>.
13. Bonifacci, P.; Marra, V.; Desideri, L.; Tobia, V.; Baiocco, R.; Ottaviani, C. Rumination and emotional profile in children with Specific Learning Disorders and their parents. *International Journal of Environmental Research and Public Health* **2020**, *17*, 389, doi:<http://dx.doi.org/10.3390/ijerph17020389>.
14. Boyes, M.E.; Leitão, S.; Claessen, M.; Badcock, N.A.; Nayton, M. Correlates of externalising and internalising problems in children with dyslexia: An analysis of data from clinical casefiles. *Australian Psychologist* **2020**, *55*, 62-72, doi:10.1111/ap.12409.
15. Camilleri, S.; Chetcuti, D.; Falzon, R. "They labeled me ignorant": Narratives of Maltese youth with dyslexia on national examinations. *Sage Open* **2019**, *9*, 1-18, doi:<http://dx.doi.org/10.1177/2158244019855674>.
16. Capozzi, F.; Casini, M.P.; Romani, M.; De Gennaro, L.; Nicolais, G.; Solano, L. Psychiatric comorbidity in learning disorder: Analysis of family variables. *Child Psychiatry and Human Development* **2008**, *39*, 101-110, doi:<http://dx.doi.org/10.1007/s10578-007-0074-5>.

17. Carroll, J.M.; Maughan, B.; Goodman, R.; Meltzer, H. Literacy difficulties and psychiatric disorders: Evidence for comorbidity. *Journal of Child Psychology and Psychiatry* **2005**, *46*, 524-532, doi:<http://dx.doi.org/10.1111/j.1469-7610.2004.00366.x>.
18. Casey, R.; Levy, S.E.; Brown, K.; Brooks-Gunn, J. Impaired emotional health in children with mild reading disability. *Journal of Developmental and Behavioral Pediatrics* **1992**, *13*, 256-260, doi:10.1097/00004703-199208000-00003.
19. Cen, S.; Aytac, B. Ecocultural perspective in learning disability: Family support resources, values, child problem behaviors. *Learning Disability Quarterly* **2017**, *40*, 114-127, doi:10.1177/0731948716683516.
20. Chiappedi, M.; Baschenis, I.M. Specific learning disorders and anxiety: A matter of school experience? *Minerva Pediatr.* **2016**, *68*, 51-55.
21. Claessen, M.; Dzidic, P.; Boyes, M.; Badcock, N.; Nayton, M.; Leitao, S. Educators' perceptions of the impact of reading difficulties for young people. *Australian Journal of Learning Difficulties* **2020**, *25*, 51-64, doi:<http://dx.doi.org/10.1080/19404158.2020.1734952>.
22. Dahle, A.E.; Knivsberg, A.M.; Andreassen, A.B. Coexisting problem behaviour in severe dyslexia. *Journal of Research in Special Educational Needs* **2011**, *11*, 162-170, doi:10.1111/j.1471-3802.2010.01190.x.
23. Dahle, A.E.; Knivsberg, A.M. Internalizing, externalizing and attention problems in dyslexia. *Scandinavian Journal of Disability Research* **2014**, *16*, 179-193, doi:10.1080/15017419.2013.781953.
24. D'Amico, A.; Guastafarro, T. Emotional and meta-emotional intelligence as predictors of adjustment problems in students with Specific Learning Disorders. *International Journal of Emotional Education* **2017**, *9*, 17-30.
25. DeBrew, J. Who will help my son?: A family's journey with dyslexia. *Journal of Psychosocial Nursing & Mental Health Services* **2017**, *55*, 27-30, doi:<http://dx.doi.org/10.3928/02793695-20170718-04>.
26. de Lima, R.F.; Salgado-Azoni, C.A.; Dell'Agli, B.A.V.; Baptista, M.N.; Ciasca, S.M. Behavior problems and depressive symptoms in developmental dyslexia: Risk assessment in Brazilian students. *Clinical Neuropsychiatry: Journal of Treatment Evaluation* **2020**, *17*, 141-148.
27. Eissa, M. Behavioral and emotional problems associated with dyslexia in adolescence. *Current Psychiatry* **2010**, *17*(1), 17-25.
28. Fussell, J.J.; Macias, M.M.; Saylor, C.F. Social skills and behavior problems in children with disabilities with and without siblings. *Child Psychiatry and Human Development* **2005**, *36*, 227-241, doi:10.1007/s10578-005-4185-6.
29. Gadeyne, E.; Ghesquière, P.; Onghena, P. Psychosocial functioning of young children with learning problems. *Journal of Child Psychology & Psychiatry* **2004**, *45*, 510-521, doi:10.1111/j.1469-7610.2004.00241.x.
30. Gallegos, J.; Langley, A.; Villegas, D. Anxiety, depression, and coping skills among Mexican school children: A comparison of students with and without learning disabilities. *Learning Disability Quarterly* **2012**, *35*, 54-61, doi:10.1177/0731948711428772.
31. Giovagnoli, S.; Mandolesi, L.; Magri, S.; Gualtieri, L.; Fabbri, D.; Tossani, E.; Benassi, M. Internalizing symptoms in developmental dyslexia: A comparison between primary and secondary school. *Frontiers in Psychology* **2020**, *11*, 461, doi:<https://dx.doi.org/10.3389/fpsyg.2020.00461>.
32. Goldston, D.B.; Walsh, A.; Arnold, E.M.; Reboussin, B.; Daniel, S.S.; Erkanli, A.; Nutter, D.; Hickman, E.; Palmes, G.; Snider, E.; et al. Reading problems, psychiatric disorders, and functional impairment from mid- to late adolescence. *Journal of the American Academy of Child & Adolescent Psychiatry* **2007**, *46*, 25-32, doi:<http://dx.doi.org/10.1097/01.chi.0000242241.77302.f4>.
33. Granot, D. Socioemotional and behavioural adaptation of students with disabilities: The significance of teacher-student attachment-like relationships. *Emot. Behav. Difficulties* **2016**, *21*, 416-432, doi:10.1080/13632752.2016.1235324.
34. Haager, D.; Vaughn, S. Parent, teacher, peer, and self-reports of the social competence of students with learning disabilities. *Journal of Learning Disabilities* **1995**, *28*, 205-231, doi:10.1177/002221949502800403.

35. Heiervang, E.; Stevenson, J.; Lund, A.; Hugdahl, K. Behaviour problems in children with dyslexia. *Nordic Journal of Psychiatry* **2001**, *55*, 251-256, doi:10.1080/080394801681019101.
36. Heying, K.R. Social competence and behavioural problems in reading-disabled boys with and without attention deficit disorder Ph.D., United States International University, Ann Arbor, 1987.
37. Hirsh, R.A. Emotional responses to the reading difficulties experienced by young children enrolled in Title I: A qualitative study of students', teachers', and families' perspectives. PhD, Indiana University of Pennsylvania, Ann Arbor, 2014.
38. Horbach, J.; Mayer, A.; Scharke, W.; Heim, S.; Günther, T. Development of behavior problems in children with and without Specific Learning Disorders in reading and spelling from kindergarten to fifth grade. *Scientific Studies of Reading* **2020**, *24*, 57-71, doi:<http://dx.doi.org/10.1080/10888438.2019.1641504>.
39. Hossain, B.; Bent, S.; Hendren, R. The association between anxiety and academic performance in children with reading disorder: A longitudinal cohort study. *Dyslexia* **2021**, *27*(3), 342-354, doi:<http://dx.doi.org/10.1002/dys.1680>.
40. Hossain, B.; Chen, Y.; Bent, S.; Parenteau, C.; Widjaja, F.; Haft, S.L.; Hoeft, F.; Hendren, R.L. The role of grit and resilience in children with reading disorder: A longitudinal cohort study. *Annals of Dyslexia* **2022**, *72*, 1-27, doi:<https://dx.doi.org/10.1007/s11881-021-00238-w>.
41. Hughes, W.; Dawson, R.O.N. Memories of school: Adult dyslexics recall their school days. *Support for learning* **1995**, *10*, 181-184, doi:10.1111/j.1467-9604.1995.tb00037.x.
42. Ibhaur, S.; Anarghou, H.; Boulhana, A.; Najimi, M.; Chigr, F. Mental health among students with neurodevelopment disorders: Case of dyslexic children and adolescents. *Dementia & Neuropsychologia* **2021**, *15*, 533-540, doi:<https://dx.doi.org/10.1590/1980-57642021dn15-040014>.
43. Ilardi, M. Maternal mentalization and child psychosocial adaptation for children with learning and behavioral disorders. Ph.D., City University of New York, Ann Arbor, 2010.
44. Ingesson, S.G. Growing up with dyslexia: Interviews with teenagers and young adults. *School Psychology International* **2007**, *28*, 574-591, doi:<http://dx.doi.org/10.1177/0143034307085659>.
45. Iyanda, A.E. Bullying victimization of children with mental, emotional, and developmental or behavioral (MEDB) disorders in the United States. *J. Child Adolesc. Trauma* **2021**, doi:<http://dx.doi.org/10.1007/s40653-021-00368-8>.
46. Jordan, J.-A.; Dyer, K. Psychological well-being trajectories of individuals with dyslexia aged 3-11 years. *Dyslexia* **2017**, *23*, 161-180, doi:<http://dx.doi.org/10.1002/dys.1555>.
47. Kempe, C.; Gustafson, S.; Samuelsson, S. A longitudinal study of early reading difficulties and subsequent problem behaviors. *Scandinavian Journal of Psychology* **2011**, *52*, 242-250, doi:10.1111/j.1467-9450.2011.00870.x.
48. Konstantareas, M.M.; Homatidis, S. Parental perception of learning-disabled children's adjustment problems and related stress. *Journal of Abnormal Child Psychology* **1989**, *17*, 177-186, doi:10.1007/BF00913792.
49. Kopelman-Rubin, D.; Siegel, A.; Weiss, N.; Kats-Gold, I. The relationship between emotion regulation, school belonging, and psychosocial difficulties among adolescents with Specific Learning Disorder. *Children & Schools* **2020**, *42*, 216-224, doi:<http://dx.doi.org/10.1093/cs/cdaa022>.
50. La Greca, A.M.; Stone, W.L. LD status and achievement: confounding variables in the study of children's social status, self-esteem, and behavioral functioning. *Journal of Learning Disabilities* **1990**, *23*, 483-490, doi:10.1177/002221949002300806.
51. Lawrence, B.C.; Harrison, G.L.; Milford, T.M. Effects of positive parenting on mental health in adolescents with learning disabilities. *Learning Disabilities (Weston, Mass.)* **2019**, *17*, 223.
52. Lawrence, B.C. Bridging secondary survey data with in-depth case studies to advance understandings of youth learning and mental health concerns. *International Journal of Multiple Research Approaches* **2020**, *12*, 166-184, doi:10.29034/ijmra.v12n2a1.



- 
53. Learned, J.E. The Behavior Kids": examining the conflation of youth reading difficulty and behavior problem positioning among school institutional contexts. *American Educational Research Journal* **2016**, *53*, 1271-1309, doi:<http://dx.doi.org/10.3102/0002831216667545>.
54. Leitão, S.; Dzidic, P.; Claessen, M.; Gordon, J.; Howard, K.; Nayton, M.; Boyes, M.E. Exploring the impact of living with dyslexia: The perspectives of children and their parents. *International Journal of Speech-Language Pathology* **2017**, *19*, 322-334, doi:10.1080/17549507.2017.1309068.
55. Lin, Y.C.; Morgan, P.L.; Hillemeier, M.; Cook, M.; Maczuga, S.; Farkas, G. Reading, mathematics, and behavioral difficulties interrelate: Evidence from a cross-lagged panel design and population-based sample of US upper elementary students. *Behavioral Disorders* **2013**, *38*, 212-227, doi:10.1177/019874291303800404.
56. Lindeblad, E.; Svensson, I.; Gustafson, S. Self-concepts and psychological well-being assessed by Beck Youth Inventory among pupils with reading difficulties. *Reading Psychology* **2016**, *37*, 449-469, doi:<http://dx.doi.org/10.1080/02702711.2015.1060092>.
57. Lytton, H. Some psychological and sociological characteristics of "good" and "poor achievers" (boys) in remedial reading groups: Clinical case studies. *Human Development* **1968**, *11*, 260-276, doi:<http://dx.doi.org/10.1159/000270611>.
58. Mahdavi, S. The Influence of early parent involvement and depression on academic achievement, psychosocial behaviors, and motivation in children with learning disabilities across elementary school. PhD, Michigan State University, Ann Arbor, 2017.
59. Martinez, R.S. A comparison of learning disability subtypes in middle school: Self-concept, perceived social support, and emotional functioning. Ph.D., The University of Texas at Austin, Ann Arbor, 2002.
60. Matteucci, M.C.; Scalone, L.; Tomasetto, C.; Selleri, P.; Cavrini, G. Health-related quality of life and psychological wellbeing of children with Specific Learning Disorders and their mothers. *Research in Developmental Disabilities* **2019**, *87*, 43-53, doi:<http://dx.doi.org/10.1016/j.ridd.2019.02.003>.
61. Maughan, B.; Rowe, R.; Loeber, R.; Stouthamer-loeber, M. Reading problems and depressed mood. *Journal of Abnormal Child Psychology* **2003**, *31*, 219-229, doi:<http://dx.doi.org/10.1023/A:1022534527021>.
62. McArthur, G.; Badcock, N.; Castles, A.; Robidoux, S. Tracking the relations between children's reading and emotional health across time: Evidence from four large longitudinal studies. *Reading Research Quarterly* **2022**, *57*, 555-585, doi:<https://doi.org/10.1002/rrq.426>.
63. Mercer, K.L. Relations of self-efficacy to symptoms of depression and anxiety in adolescents with learning disabilities. Ph.D., The University of British Columbia (Canada), Ann Arbor, 2004.
64. Michaels, C.R.; Lewandowski, L.J. Psychological adjustment and family functioning of boys with learning disabilities. *Journal of Learning Disabilities* **1990**, *23*, 446-450, doi:10.1177/002221949002300709.
65. Morgan, P.L.; Farkas, G.; Tufis, P.A.; Sperling, R.A. Are reading and behavior problems risk factors for each other? *Journal of Learning Disabilities* **2008**, *41*, 417-436, doi:<http://dx.doi.org/10.1177/0022219408321123>.
66. Morgan, P.L.; Farkas, G.; Wu, Q. Do poor readers feel angry, sad, and unpopular? *Scientific Studies of Reading* **2012**, *16*, 360, doi:<http://dx.doi.org/10.1080/10888438.2011.570397>.
67. Newbury, J.; Justice, L.M.; Jiang, H.H.; Schmitt, M.B. Cognitive, noncognitive, and home environment correlates of reading difficulties in primary-grade students with language impairment. *Journal of Speech, Language & Hearing Research* **2020**, *63*, 1933-1946, doi:10.1044/2020\_jslhr-19-00363.
68. Novita, S. Secondary symptoms of dyslexia: A comparison of self-esteem and anxiety profiles of children with and without dyslexia. *European Journal of Special Needs Education* **2016**, *31*, 279-288, doi:<http://dx.doi.org/10.1080/08856257.2015.1125694>.

69. Novita, S.; Uyun, Q.; Witruk, E.; Siregar, J.R. Children with dyslexia in different cultures: Investigation of anxiety and coping strategies of children with dyslexia in Indonesia and Germany. *Annals of Dyslexia* **2019**, *69*, 204-218, doi:10.1007/s11881-019-00179-5.
70. Operto, F.F.; Smirni, D.; Scuoppo, C.; Padovano, C.; Vivenzio, V.; Quatrosi, G.; Carotenuto, M.; Precenzano, F.; Pastorino, G.M.G. Neuropsychological profile, emotional/behavioral problems, and parental stress in children with neurodevelopmental disorders. *Brain Sciences* **2021**, *11*, doi:10.3390/brainsci11050584.
71. Palti, G. A study of the socio-emotional aspects of educationally resilient dyslexic pupils. Ph.D., University of Bristol (United Kingdom), Ann Arbor, 1998.
72. Panicker, A.S.; Chelliah, A. Resilience and stress in children and adolescents with Specific Learning Disability. *Journal of the Canadian Academy of Child & Adolescent Psychiatry* **2016**, *25*, 17-23.
73. Parhiala, P.; Torppa, M.; Eklund, K.; Aro, T.; Poikkeus, A.M.; Heikkilä, R.; Ahonen, T. Psychosocial functioning of children with and without dyslexia: A follow-up study from ages four to nine. *Dyslexia* **2015**, *21*, 197-211, doi:<http://dx.doi.org/10.1002/dys.1486>.
74. Pih, G.F. A comparison of normal and disabled readers in elementary school on intellectual, self-esteem, and anxiety factors Ph.D., University of Georgia, Ann Arbor, 1984.
75. Russell, G.; Ford, T.; Ryder, D.; Norwich, B. Behavioural difficulties that co-occur with specific word reading difficulties: A UK population-based cohort study. *Dyslexia* **2015**, *21*, 123-141, doi:<http://dx.doi.org/10.1002/dys.1496>.
76. Sahin, B.; Karabekiroglu, K.; Aydin, M.; Cobanoglu, C.; Bozkurt, A.; Usta, M.B. The relationship of clinical symptoms with social cognition in children diagnosed with attention deficit hyperactivity disorder, specific learning disorder or autism spectrum disorder. *Psychiatry Investigation* **2018**, *15*, 1144-1153, doi:<http://dx.doi.org/10.30773/PI.2018.10.01>.
77. Sainio, P.J.; Eklund, K.M.; Ahonen, T.P.S.; Kiuru, N.H. The role of learning difficulties in adolescents' academic emotions and academic achievement. *Journal of Learning Disabilities* **2019**, *52*, 287-298, doi:<http://dx.doi.org/10.1177/0022219419841567>.
78. Singer, E. The strategies adopted by Dutch children with dyslexia to maintain their self-esteem when teased at school. *Journal of Learning Disabilities* **2005**, *38*, 411-423, doi:<http://dx.doi.org/10.1177/00222194050380050401>.
79. Singer, E. Coping with academic failure, a study of Dutch children with dyslexia. *Dyslexia* **2007**, *14*, 314-333, doi:10.1002/dys.352.
80. Smart, D.; Youssef, G.J.; Sanson, A.; Prior, M.; Toumbourou, J.W.; Olsson, C.A. Social mediators of relationships between childhood reading difficulties, behaviour problems, and secondary school noncompletion. *Australian Journal of Psychology* **2019**, *71*, 171-182, doi:<http://dx.doi.org/10.1111/ajpy.12220>.
81. Snowling, M.J.; Muter, V.; Carroll, J. Children at family risk of dyslexia: A follow-up in early adolescence. *Journal of Child Psychology and Psychiatry* **2007**, *48*, 609-618, doi:<http://dx.doi.org/10.1111/j.1469-7610.2006.01725.x>.
82. Sorrenti, L.; Spadaro, L.; Mafodda, A.V.; Scopelliti, G.; Orecchio, S.; Filippello, P. The predicting role of school learned helplessness in internalizing and externalizing problems: An exploratory study in students with Specific Learning Disorder. *Mediterr. J. Clin. Psychol.* **2019**, *7*, 1-13, doi:10.6092/2282-1619/2019.7.2035.
83. Speers, J. An auto/biographical investigation exploring the life-stories of adults with dyslexia. PhD thesis, Canterbury Christ Church University (United Kingdom), Ann Arbor, 2019.
84. Stanley, P.D.; Dai, Y.; Nolan, R.F. Differences in depression and self-esteem reported by learning disabled and behavior disordered middle school students. *Journal of Adolescence* **1997**, *20*, 219-222, doi:10.1006/jado.1996.0079.
85. Sukovieff, A.; Kruk, R.S. Reading difficulty and socio-emotional adjustment: Internalizing patterns depend on age of identification. *Cogent Educ.* **2021**, *8*, doi:10.1080/2331186X.2021.1910162.

- 
86. Terras, M.M.; Thompson, L.C.; Minnis, H. Dyslexia and psycho-social functioning: An exploratory study of the role of self-esteem and understanding. *Dyslexia* **2009**, *15*, 304-327, doi:10.1002/dys.386.
  87. Thompson Jr, R.J.; Lampron, L.B.; Johnson, D.F.; Eckstein, T.L. Behavior problems in children with the presenting problem of poor school performance. *J. Pediatr. Psychol.* **1990**, *15*, 3-20.
  88. Tistan, P.A. Learning disabilities and depression in children: The development of self-concept and achievement. Ph.D., Seton Hall University, School of Education, Ann Arbor, 1993.
  89. Törő, K.T.; Miklósi, M.; Horanyi, E.; Kovács, G.P.; Balázs, J. Reading disability spectrum: Early and late recognition, subthreshold, and full comorbidity. *Journal of Learning Disabilities* **2018**, *51*, 158-167, doi:10.1177/0022219417704169.
  90. Tsovoli, T.D. The relationship between language teachers' attitudes and the state-trait anxiety of adolescents with dyslexia. *Journal of Research in Reading* **2004**, *27*, 69-86, doi:http://dx.doi.org/10.1111/j.1467-9817.2004.00215.x.
  91. Turunen, T.; Kiuru, N.; Poskiparta, E.; Niemi, P.; Nurmi, J.E. Word reading skills and externalizing and internalizing problems from grade 1 to grade 2—Developmental trajectories and bullying involvement in grade 3. *Scientific Studies of Reading* **2019**, *23*, 161-177, doi:10.1080/10888438.2018.1497036.
  92. Undheim, A.M.; Sund, A.M. Psychosocial factors and reading difficulties: Students with reading difficulties drawn from a representative population sample. *Scandinavian Journal of Psychology* **2008**, *49*, 377-384, doi:10.1111/j.1467-9450.2008.00661.x.
  93. Undheim, A.M.; Wichstrøm, L.; Sund, A.M. Emotional and behavioral problems among school adolescents with and without reading difficulties as measured by the Youth Self-report: A one-year follow-up study. *Scandinavian Journal of Educational Research* **2011**, *55*, 291-305, doi:10.1080/00313831.2011.576879.
  94. Valenti, F.R. Manifest aggression, state/trait anxiety, locus of control, perceived parental attention, and reading level among learning disabled adolescent males, PhD thesis, Boston University, Ann Arbor, 1986.
  95. Willcutt, E.G.; Betjemann, R.S.; Pennington, B.F.; Olson, R.K.; DeFries, J.C.; Wadsworth, S.J. Longitudinal study of reading disability and attention-deficit/hyperactivity disorder: Implications for education. *Mind, Brain, and Education* **2007**, *1*, 181-192, doi:http://dx.doi.org/10.1111/j.1751-228X.2007.00019.x.
  96. Willcutt, E.G.; Petrill, S.A.; Wu, S.; Boada, R.; DeFries, J.C.; Olson, R.K.; Pennington, B.F. Comorbidity between reading disability and math disability: Concurrent psychopathology, functional impairment, and neuropsychological functioning. *Journal of Learning Disabilities* **2013**, *46*, 500-516, doi:10.1177/0022219413477476.
  97. Zach, S.; Yazdi-Ugav, O.; Zeev, A. Academic achievements, behavioral problems, and loneliness as predictors of social skills among students with and without learning disorders. *School Psychology International* **2016**, *37*, 378-396, doi:10.1177/0143034316649231.
  98. Zuppardo, L.; Serrano, F.; Pirrone, C.; Rodriguez-Fuentes, A. More than words: Anxiety, self-esteem and behavioral problems in children and adolescents with dyslexia. *Learning Disability Quarterly* **2021**, doi:10.1177/07319487211041103.
